# Supplementary material for: JRmGRN: joint reconstruction of multiple gene regulatory networks with common hub genes using data from multiple tissues or conditions
Source: Oxford University Press journal article supplement (doi:10.1093/bioinformatics/bty354), 2018-04-27
Supplement: bioinformatics_34_20_3470_s8.xlsx [file bioinformatics_34_20_3470_s8.xlsx]

## Sheet: gene_info
symbol	gene_id		CONNECTIVITY	X	Freq_in_DE	light_GO	freq_in_light_GO	Type	Short_description	Curator_summary	Computational_description	Cellular.components	GO_desc	evidence	Mol..Function	Desc	evidence.1	Biol.Proc	DESC	Wvidence	symbol	Length	wCot1h.1	wCot1h.2	W1H	wCot2h.1	wCot2h.2	W2H	wCot30m.1	wCot30m.2	W30M	wCot3h.1	wCot3h.2	W3H	wCot4h.1	wCot4h.2	W4H	wCot7h.1	wCot7h.2	W7H	sCot1h.1	sCot1h.2	S1H	sCot2h.1	sCot2h.2	S2H	sCot30m.1	sCot30m.2	S30MIN
PLPC	AT2G02710	AT2G02710	196	1481	1	NA	NA	protein_coding	PLPB (PAS/LOV PROTEIN B); signal transducer/ two-component sensor	Encodes a putative blue light receptor protein.	PAS/LOV PROTEIN C (PLPC); FUNCTIONS IN: two-component sensor activity, signal transducer activity; INVOLVED IN: signal transduction, regulation of transcription, DNA-dependent, two-component signal transduction system (phosphorelay); LOCATED IN: cellular_component unknown; EXPRESSED IN: 23 plant structures; EXPRESSED DURING: 14 growth stages; CONTAINS InterPro DOMAIN/s: PAC motif (InterPro:IPR001…	GO:0005575	cellular_component	Communication:1345790	GO:0000155 | GO:0000155 | GO:0004871 | GO:0004871 | GO:0004871	two-component sensor activity | two-component sensor activity | signal transducer activity | signal transducer activity | signal transducer activity	AnalysisReference:501730468 | AnalysisReference:501730468 | Communication:501714663 | AnalysisReference:501730468 | AnalysisReference:501730468	GO:0000160 | GO:0006355 | GO:0006355 | GO:0007165 | GO:0007165	two-component signal transduction system (phosphorelay) | "regulation of transcription, DNA-dependent" | "regulation of transcription, DNA-dependent" | signal transduction | signal transduction	AnalysisReference:501730468 | Communication:501714663 | AnalysisReference:501730468 | Communication:501714663 | AnalysisReference:501730468	PLPC	1724	281	315	298	522	462	492	707	666	686.5	480	765	622.5	949	1229	1089	1453	2205	1829	399	474	436.5	595	531	563	290	330	310
PLIM2a	AT2G45800	AT2G45800	195	299	1	NA	NA	protein_coding	LIM domain-containing protein	---	LIM domain-containing protein; FUNCTIONS IN: zinc ion binding; INVOLVED IN: biological_process unknown; LOCATED IN: cellular_component unknown; EXPRESSED IN: 9 plant structures; EXPRESSED DURING: L mature pollen stage, M germinated pollen stage, 4 anthesis, C globular stage, petal differentiation and expansion stage; CONTAINS InterPro DOMAIN/s: Zinc finger, LIM-type (InterPro:IPR001781); BEST Ara…	GO:0005575	cellular_component	Communication:501683652	GO:0008270 | GO:0008270	zinc ion binding | zinc ion binding	AnalysisReference:501730468 | AnalysisReference:501730468	GO:0008150	biological_process	Communication:501683652	PLIM2a	1166	232	318	275	216	179	197.5	196	212	204	127	196	161.5	147	164	155.5	63	64	63.5	235	242	238.5	176	152	164	309	340	324.5
AT3G45260	AT3G45260	AT3G45260	195	314	1	NA	NA	protein_coding	zinc finger (C2H2 type) family protein	---	zinc finger (C2H2 type) family protein; FUNCTIONS IN: transcription factor activity, zinc ion binding, nucleic acid binding; INVOLVED IN: regulation of transcription; LOCATED IN: intracellular; EXPRESSED IN: 13 plant structures; EXPRESSED DURING: 9 growth stages; CONTAINS InterPro DOMAIN/s: Zinc finger, C2H2-like (InterPro:IPR015880), Zinc finger, C2H2-type (InterPro:IPR007087); BEST Arabidopsis …	GO:0005622	intracellular	AnalysisReference:501730468	GO:0003676 | GO:0003700 | GO:0008270	nucleic acid binding | transcription factor activity | zinc ion binding	Communication:501714663 | Publication:1345963|PMID:11118137 | Communication:501714663	GO:0045449	regulation of transcription	Publication:1345963|PMID:11118137	AT3G45260	1885	39	50	44.5	77	68	72.5	224	201	212.5	149	171	160	215	234	224.5	388	587	487.5	38	51	44.5	120	91	105.5	54	53	53.5
BLH10	AT1G19700	AT1G19700	193	244	1	NA	NA	protein_coding	BEL10 (BEL1-LIKE HOMEODOMAIN 10); DNA binding / transcription factor	Encodes a member of the BEL family of homeodomain proteins. Its interaction with PLP (PAS/LOV PROTEIN) is diminished by blue light.	BEL1-LIKE HOMEODOMAIN 10 (BEL10); FUNCTIONS IN: transcription factor activity, DNA binding; INVOLVED IN: regulation of transcription, DNA-dependent, regulation of transcription; LOCATED IN: nucleus; EXPRESSED IN: 20 plant structures; EXPRESSED DURING: 11 growth stages; CONTAINS InterPro DOMAIN/s: Homeobox (InterPro:IPR001356), Homeodomain-like (InterPro:IPR009057), POX (InterPro:IPR006563), Homeo…	GO:0005634 | GO:0005634	nucleus | nucleus	AnalysisReference:501730468 | Communication:501714663	GO:0003677 | GO:0003700	DNA binding | transcription factor activity	Communication:501714663 | Publication:1345963|PMID:11118137	GO:0006355 | GO:0006355 | GO:0045449	regulation of transcription, DNA-dependent | "regulation of transcription, DNA-dependent" | regulation of transcription	Communication:501714663 | AnalysisReference:501730468 | AnalysisReference:501730468	BLH10	2375	3875	5135	4505	3167	2809	2988	3399	3668	3533.5	2112	2743	2427.5	1966	2528	2247	1001	1249	1125	3363	3267	3315	2612	2273	2442.5	4747	5573	5160
CCL	AT3G26740	AT3G26740	193	1767	1	NA	NA	protein_coding	CCL (CCR-LIKE)	transcripts are differentially regulated at the level of mRNA stability at different times of day controlled by the circadian clock. mRNAs are targets of the mRNA degradation pathway mediated by the downstream (DST) instability determinant.	CCR-LIKE (CCL); FUNCTIONS IN: molecular_function unknown; INVOLVED IN: biological_process unknown; LOCATED IN: chloroplast; EXPRESSED IN: 23 plant structures; EXPRESSED DURING: 13 growth stages; CONTAINS InterPro DOMAIN/s: Light regulated Lir1 (InterPro:IPR009856); Has 44 Blast hits to 44 proteins in 17 species: Archae - 0; Bacteria - 0; Metazoa - 0; Fungi - 0; Plants - 44; Viruses - 0; Other Euk…	GO:0009507 | GO:0009507	chloroplast | chloroplast	Publication:501712079|PMID:15028209 | Publication:501724486|PMID:18431481	GO:0003674	molecular_function	Communication:501683652	GO:0008150	biological_process	Communication:1345790	CCL	712	87	94	90.5	225	171	198	235	185	210	681	1021	851	1921	2565	2243	7520	10620	9070	187	137	162	519	420	469.5	119	119	119
AT1G62310	AT1G62310	AT1G62310	192	255	1	NA	NA	protein_coding	transcription factor jumonji (jmjC) domain-containing protein	---	transcription factor jumonji (jmjC) domain-containing protein; FUNCTIONS IN: protein binding, transcription factor activity, zinc ion binding; EXPRESSED IN: 22 plant structures; EXPRESSED DURING: 14 growth stages; CONTAINS InterPro DOMAIN/s: Transcription factor jumonji/aspartyl beta-hydroxylase (InterPro:IPR003347), Zinc finger, RING-type (InterPro:IPR001841), Transcription factor jumonji (Inter…	---	---	---	GO:0003700 | GO:0005515 | GO:0008270	transcription factor activity | protein binding | zinc ion binding	Communication:501714663 | AnalysisReference:501730468 | AnalysisReference:501730468	---	---	---	AT1G62310	2687	115	147	131	157	125	141	434	395	414.5	220	292	256	299	422	360.5	472	587	529.5	144	149	146.5	221	176	198.5	177	196	186.5
PEX11B	AT3G47430	AT3G47430	192	1797	1	NA	NA	protein_coding	PEX11B	member of the peroxin11 (PEX11) gene family, located on the peroxisome membrane, controls peroxisome proliferation.	PEX11B; FUNCTIONS IN: molecular_function unknown; INVOLVED IN: peroxisome fission, response to light stimulus, peroxisome organization; LOCATED IN: peroxisomal membrane; EXPRESSED IN: 19 plant structures; EXPRESSED DURING: 13 growth stages; CONTAINS InterPro DOMAIN/s: Peroxisomal biogenesis factor 11 (InterPro:IPR008733); BEST Arabidopsis thaliana protein match is: PEX11A (PEROXIN 11A) (TAIR:AT1G…	GO:0005778 | GO:0005778	peroxisomal membrane | peroxisomal membrane	Communication:501714663 | Publication:501720792|PMID:17220199	GO:0003674	molecular_function	Communication:1345790	GO:0007031 | GO:0016559 | GO:0016559 | GO:0016559	peroxisome organization | peroxisome fission | peroxisome fission | peroxisome fission	Publication:501721644|PMID:17478547 | Publication:501720792|PMID:17220199 | Communication:501714663 | Publication:501720792|PMID:17220199	PEX11B	979	3223	3714	3468.5	2794	2674	2734	2789	2820	2804.5	2119	2700	2409.5	2105	2438	2271.5	1024	1274	1149	3219	3383	3301	2759	2293	2526	3635	4330	3982.5
BZO2H3	AT5G28770	AT5G28770	192	367	2	NA	NA	protein_coding	BZO2H3; DNA binding / protein heterodimerization/ transcription factor	bZIP protein BZO2H3 mRNA, partial cds	BZO2H3; FUNCTIONS IN: transcription factor activity, protein heterodimerization activity, DNA binding; INVOLVED IN: regulation of transcription, DNA-dependent; LOCATED IN: nucleus; EXPRESSED IN: 22 plant structures; EXPRESSED DURING: 13 growth stages; CONTAINS InterPro DOMAIN/s: Basic-leucine zipper (bZIP) transcription factor (InterPro:IPR004827), bZIP transcription factor, bZIP-1 (InterPro:IPR0…	GO:0005634	nucleus	AnalysisReference:501730468	GO:0003677 | GO:0003700 | GO:0003700 | GO:0003700 | GO:0046982	DNA binding | transcription factor activity | transcription factor activity | transcription factor activity | protein heterodimerization activity	Communication:501714663 | Communication:501714663 | Publication:1345963|PMID:11118137 | Publication:1547369|PMID:11906833 | Publication:501719057|PMID:16709202	GO:0006355 | GO:0006355	regulation of transcription, DNA-dependent | "regulation of transcription, DNA-dependent"	Communication:501714663 | AnalysisReference:501730468	BZO2H3	1276	176	169	172.5	896	618	757	406	382	394	709	1088	898.5	1316	1551	1433.5	1601	2377	1989	446	664	555	907	664	785.5	141	162	151.5
PD1	AT2G27820	AT2G27820	190	89	1	AT2G27820	1	protein_coding	PD1 (PREPHENATE DEHYDRATASE 1); arogenate dehydratase/ prephenate dehydratase	Encodes a plastid-localized arogenate dehydratase involved in phenylalanine biosynthesis. Not less than six genes encoding ADT were identi&#64257;ed in the Arabidopsis genome: ADT1 [At1g11790]; ADT2 [At3g07630]; ADT3 [At2g27820]; ADT4 [At3g44720]; ADT5 [At5g22630]; and ADT6 [At1g08250].	PREPHENATE DEHYDRATASE 1 (PD1); FUNCTIONS IN: arogenate dehydratase activity, prephenate dehydratase activity; INVOLVED IN: tyrosine biosynthetic process, response to low fluence blue light stimulus by blue low-fluence system, L-phenylalanine biosynthetic process; LOCATED IN: cytosol, chloroplast; EXPRESSED IN: 21 plant structures; EXPRESSED DURING: 13 growth stages; CONTAINS InterPro DOMAIN/s: P…	GO:0005829 | GO:0009507	cytosol | chloroplast	Publication:501718375|PMID:16415218 | Publication:501729586|PMID:19136569	GO:0004664 | GO:0047769	prephenate dehydratase activity | arogenate dehydratase activity	Communication:501714663 | Publication:501722870|PMID:17726025	GO:0006571 | GO:0009094 | GO:0009094 | GO:0010244	tyrosine biosynthetic process | L-phenylalanine biosynthetic process | L-phenylalanine biosynthetic process | response to low fluence blue light stimulus by blue low-fluence system	Publication:501718375|PMID:16415218 | Publication:501718375|PMID:16415218 | Communication:501714663 | Publication:501718375|PMID:16415218	PD1	1521	3007	4038	3522.5	2305	2172	2238.5	2555	2644	2599.5	1334	1760	1547	1431	1744	1587.5	958	1305	1131.5	3136	3417	3276.5	2099	1756	1927.5	3816	4404	4110
ELIP1	AT3G22840	AT3G22840	189	134	2	AT3G22840	2	protein_coding	ELIP1 (EARLY LIGHT-INDUCABLE PROTEIN); chlorophyll binding	Encodes an early light-inducible protein.	EARLY LIGHT-INDUCABLE PROTEIN (ELIP1); FUNCTIONS IN: chlorophyll binding; INVOLVED IN: response to cold; EXPRESSED IN: 21 plant structures; EXPRESSED DURING: 12 growth stages; BEST Arabidopsis thaliana protein match is: ELIP2 (EARLY LIGHT-INDUCIBLE PROTEIN 2); chlorophyll binding (TAIR:AT4G14690.1); Has 240 Blast hits to 240 proteins in 42 species: Archae - 0; Bacteria - 5; Metazoa - 0; Fungi - 0…	---	---	---	GO:0016168	chlorophyll binding	Communication:501714663	GO:0009409	response to cold	Publication:501717819|PMID:16258011	ELIP1	884	4093	5499	4796	4039	3957	3998	1740	1804	1772	1513	2156	1834.5	1135	1036	1085.5	189	241	215	4124	4176	4150	2893	2128	2510.5	4352	4133	4242.5
TCP11	AT5G08330	AT5G08330	189	358	1	NA	NA	protein_coding	TCP family transcription factor, putative	---	TCP family transcription factor, putative; FUNCTIONS IN: transcription factor activity; INVOLVED IN: regulation of transcription; LOCATED IN: cellular_component unknown; EXPRESSED IN: 21 plant structures; EXPRESSED DURING: 13 growth stages; CONTAINS InterPro DOMAIN/s: Transcription factor, TCP (InterPro:IPR005333), Transcription factor TCP subgroup (InterPro:IPR017887); BEST Arabidopsis thaliana …	GO:0005575	cellular_component	Communication:1345790	GO:0003700 | GO:0003700	transcription factor activity | transcription factor activity	Communication:501714663 | Publication:1345963|PMID:11118137	GO:0045449	regulation of transcription	Publication:1345963|PMID:11118137	TCP11	1070	302	404	353	830	722	776	1483	1679	1581	1071	1347	1209	1241	1599	1420	1787	2471	2129	478	490	484	902	707	804.5	573	660	616.5
POP12	AT5G44110	AT5G44110	187	200	1	AT5G44110	1	protein_coding	POP1; transporter	Encodes a member of the NAP subfamily of ABC transporters.	POP1; FUNCTIONS IN: transporter activity; INVOLVED IN: response to red light, response to far red light; EXPRESSED IN: 23 plant structures; EXPRESSED DURING: 13 growth stages; BEST Arabidopsis thaliana protein match is: ABC transporter family protein (TAIR:AT1G03905.1); Has 5451 Blast hits to 5433 proteins in 1170 species: Archae - 54; Bacteria - 3903; Metazoa - 218; Fungi - 244; Plants - 149; Vi…	---	---	---	GO:0005215 | GO:0005215	transporter activity | transporter activity	Communication:1674996 | Publication:501680567|PMID:11346655	GO:0010114 | GO:0010218	response to red light | response to far red light	Publication:501720486|PMID:17076805 | Publication:501720486|PMID:17076805	POP12	1077	1496	2016	1756	344	332	338	1281	1608	1444.5	194	219	206.5	187	185	186	147	167	157	1004	878	941	331	244	287.5	2087	2301	2194
AT3G15570	AT3G15570	AT3G15570	185	118	1	AT3G15570	1	protein_coding	phototropic-responsive NPH3 family protein	---	phototropic-responsive NPH3 family protein; FUNCTIONS IN: signal transducer activity; INVOLVED IN: response to light stimulus; LOCATED IN: cellular_component unknown; EXPRESSED IN: 14 plant structures; EXPRESSED DURING: 9 growth stages; CONTAINS InterPro DOMAIN/s: NPH3 (InterPro:IPR004249); BEST Arabidopsis thaliana protein match is: phototropic-responsive NPH3 family protein (TAIR:AT1G52770.1); …	GO:0005575	cellular_component	Communication:1345790	GO:0004871 | GO:0004871	signal transducer activity | signal transducer activity	Communication:501714663 | AnalysisReference:501730468	GO:0009416 | GO:0009416	response to light stimulus | response to light stimulus	Communication:501714663 | AnalysisReference:501730468	AT3G15570	1999	80	82	81	286	243	264.5	173	148	160.5	392	525	458.5	751	943	847	996	1485	1240.5	246	338	292	357	283	320	137	148	142.5
NAC102	AT5G63790	AT5G63790	174	392	1	NA	NA	protein_coding	ANAC102 (ARABIDOPSIS NAC DOMAIN CONTAINING PROTEIN 102); transcription factor	Encodes a member of the NAC family of transcription factors. ANAC102 appears to have a role in mediating response to low oxygen stress (hypoxia) in germinating seedlings.	ARABIDOPSIS NAC DOMAIN CONTAINING PROTEIN 102 (ANAC102); FUNCTIONS IN: transcription factor activity; INVOLVED IN: multicellular organismal development, response to hypoxia; EXPRESSED IN: 26 plant structures; EXPRESSED DURING: 12 growth stages; CONTAINS InterPro DOMAIN/s: No apical meristem (NAM) protein (InterPro:IPR003441); BEST Arabidopsis thaliana protein match is: ATAF2; transcription activa…	---	---	---	GO:0003700	transcription factor activity	Publication:1345963|PMID:11118137	GO:0001666 | GO:0007275	response to hypoxia | multicellular organismal development	Publication:501729465|PMID:19176720 | Communication:501714663	NAC102	1317	548	662	605	712	591	651.5	2044	2360	2202	828	950	889	798	975	886.5	852	1145	998.5	519	585	552	859	756	807.5	832	940	886
WAV2	AT5G20520	AT5G20520	172	2122	1	NA	NA	protein_coding	WAV2 (WAVY GROWTH 2)	Encodes a Bem46-like protein. WAV2 negatively regulates root bending when roots alter their growth direction. It's not involved in sensing environmental stimuli (e.g. gravity, light, water, touch).	WAVY GROWTH 2 (WAV2); INVOLVED IN: phototropism, response to water, positive gravitropism, root development; LOCATED IN: in 7 components; EXPRESSED IN: 28 plant structures; EXPRESSED DURING: 16 growth stages; CONTAINS InterPro DOMAIN/s: Alpha/beta hydrolase fold-1 (InterPro:IPR000073); BEST Arabidopsis thaliana protein match is: unknown protein (TAIR:AT1G13610.1); Has 3329 Blast hits to 3329 prot…	GO:0005783 | GO:0005886 | GO:0019866	endoplasmic reticulum | plasma membrane | organelle inner membrane	Publication:501718909|PMID:16618929 | Publication:501714404|PMID:15659627 | Publication:501714404|PMID:15659627	---	---	---	GO:0048364	root development	Publication:501714404|PMID:15659627	WAV2	1448	591	744	667.5	666	541	603.5	1714	1729	1721.5	505	646	575.5	606	667	636.5	550	674	612	599	682	640.5	555	511	533	738	889	813.5
EIP6	AT3G21150	AT3G21150	34	121	1	AT3G21150	1	protein_coding	zinc finger (B-box type) family protein	---	zinc finger (B-box type) family protein; FUNCTIONS IN: transcription factor activity, zinc ion binding; INVOLVED IN: response to chitin, regulation of transcription; LOCATED IN: intracellular; CONTAINS InterPro DOMAIN/s: Zinc finger, B-box (InterPro:IPR000315); BEST Arabidopsis thaliana protein match is: zinc ion binding (TAIR:AT4G15248.1); Has 570 Blast hits to 534 proteins in 37 species: Archae…	GO:0005622	intracellular	AnalysisReference:501730468	GO:0003700 | GO:0008270	transcription factor activity | zinc ion binding	Publication:1345963|PMID:11118137 | Communication:501714663	GO:0010200 | GO:0045449	response to chitin | regulation of transcription	Publication:501722879|PMID:17722694 | Publication:1345963|PMID:11118137	EIP6	904	939	1561	1250	839	703	771	5216	6412	5814	519	531	525	276	309	292.5	38	35	36.5	868	708	788	912	682	797	2062	2453	2257.5
GA4H	AT1G80340	AT1G80340	33	73	1	AT1G80340	1	protein_coding	GA3OX2 (GIBBERELLIN 3-OXIDASE 2); gibberellin 3-beta-dioxygenase	Encodes a protein with gibberellin 3 &#946;-hydroxylase activity. The protein was heterologously expressed in E. coli and shown to catalyze the hydroxylation of both GA9 and GA20.	GIBBERELLIN 3-OXIDASE 2 (GA3OX2); FUNCTIONS IN: gibberellin 3-beta-dioxygenase activity; INVOLVED IN: response to red or far red light, response to red light, gibberellin biosynthetic process, seed germination; LOCATED IN: cellular_component unknown; EXPRESSED IN: 13 plant structures; EXPRESSED DURING: seedling growth; CONTAINS InterPro DOMAIN/s: 2OG-Fe(II) oxygenase (InterPro:IPR005123); BEST Ar…	GO:0005575	cellular_component	Communication:1345790	GO:0016707 | GO:0016707	gibberellin 3-beta-dioxygenase activity | gibberellin 3-beta-dioxygenase activity	Publication:1990|PMID:9836749 | Publication:1990|PMID:9836749	GO:0009639 | GO:0009686 | GO:0009686 | GO:0009845 | GO:0010114	response to red or far red light | gibberellin biosynthetic process | gibberellin biosynthetic process | seed germination | response to red light	Publication:501720219|PMID:17010113 | Publication:1990|PMID:9836749 | Publication:501716353|PMID:15923331 | Publication:1990|PMID:9836749 | Publication:501721355|PMID:17449805	GA4H	1083	8	19	13.5	30	35	32.5	2	0	1	32	41	36.5	34	56	45	91	111	101	20	28	24	39	32	35.5	16	15	15.5
AT5G61590	AT5G61590	AT5G61590	33	388	1	NA	NA	protein_coding	AP2 domain-containing transcription factor family protein	encodes a member of the ERF (ethylene response factor) subfamily B-3 of ERF/AP2 transcription factor family. The protein contains one AP2 domain. There are 18 members in this subfamily including ATERF-1, ATERF-2, AND ATERF-5.	AP2 domain-containing transcription factor family protein; FUNCTIONS IN: transcription factor activity, DNA binding; INVOLVED IN: response to water deprivation, regulation of transcription, DNA-dependent; LOCATED IN: nucleus; EXPRESSED IN: 22 plant structures; EXPRESSED DURING: 13 growth stages; CONTAINS InterPro DOMAIN/s: DNA-binding, integrase-type (InterPro:IPR016177), Pathogenesis-related tra…	GO:0005634	nucleus	Communication:501714663	GO:0003677 | GO:0003700 | GO:0003700 | GO:0003700	DNA binding | transcription factor activity | transcription factor activity | transcription factor activity	Communication:501714663 | Communication:501714663 | Publication:2298|PMID:9687012 | Publication:1345963|PMID:11118137	GO:0006355 | GO:0009414	regulation of transcription, DNA-dependent | response to water deprivation	Communication:501714663 | Publication:501725136|PMID:18552355	AT5G61590	887	277	235	256	553	510	531.5	110	97	103.5	713	1026	869.5	1024	1404	1214	2059	3174	2616.5	284	392	338	429	335	382	173	200	186.5
TED_5	AT5G11260	AT5G11260	32	187	1	AT5G11260	1	protein_coding	HY5 (ELONGATED HYPOCOTYL 5); DNA binding / double-stranded DNA binding / transcription factor	Basic leucine zipper (bZIP) transcription factor. Nuclear localization. Involved in light-regulated transcriptional activation of G-box-containing promoters. Negatively regulated by Cop1. Although cytokinins do not appear to affect the gene's promoter activity, they appear to stabilize the protein. HY5 plays a role in anthocyanin accumulation in far-red light and blue light, but not in red light …	ELONGATED HYPOCOTYL 5 (HY5); FUNCTIONS IN: double-stranded DNA binding, transcription factor activity, DNA binding; INVOLVED IN: in 12 processes; LOCATED IN: nucleus; EXPRESSED IN: 23 plant structures; EXPRESSED DURING: 13 growth stages; CONTAINS InterPro DOMAIN/s: Basic-leucine zipper (bZIP) transcription factor (InterPro:IPR004827), bZIP transcription factor, bZIP-1 (InterPro:IPR011616), cAMP r…	GO:0005634 | GO:0005634 | GO:0005634	nucleus | nucleus | nucleus	Publication:2576|PMID:9596629 | Publication:2931|PMID:9367981 | Publication:501719242|PMID:16829591	GO:0003677 | GO:0003677 | GO:0003677 | GO:0003690 | GO:0003700 | GO:0003700 | GO:0003700 | GO:0003700	DNA binding | DNA binding | DNA binding | double-stranded DNA binding | transcription factor activity | transcription factor activity | transcription factor activity | transcription factor activity	Publication:501720919|PMID:17319847 | Publication:501720919|PMID:17319847 | Publication:2576|PMID:9596629 | Publication:501724355|PMID:18332440 | Communication:501714663 | Publication:5837|PMID:11019812 | Publication:1345963|PMID:11118137 | Publication:1547369|PMID:11906833	GO:0006355 | GO:0006355 | GO:0009640 | GO:0009640 | GO:0009737 | GO:0009740 | GO:0009963 | GO:0010017 | GO:0010099 | GO:0010114 | GO:0010218 | GO:0010224 | GO:0010224 | GO:0010224 | GO:0031539	regulation of transcription, DNA-dependent | "regulation of transcription, DNA-dependent" | photomorphogenesis | photomorphogenesis | response to abscisic acid stimulus | gibberellic acid mediated signaling | positive regulation of flavonoid biosynthetic process | red or far red light signaling pathway | regulation of photomorphogenesis | response to red light | response to far red light | respon…	Communication:501714663 | Publication:5837|PMID:11019812 | Publication:25|PMID:10990463 | Publication:501679594|PMID:11145879 | Publication:501724355|PMID:18332440 | Publication:501723840|PMID:18053005 | Publication:501719242|PMID:16829591 | Publication:501719809|PMID:16891401 | Publication:501723840|PMID:18053005 | Publication:501720486|PMID:17076805 | Publication:501720486|PMID:17076805 | Publi…	TED_5	902	1495	1774	1634.5	666	536	601	2587	2749	2668	398	426	412	348	319	333.5	128	175	151.5	883	777	830	558	465	511.5	2158	2397	2277.5
LHY1	AT1G01060	AT1G01060	31	1	1	AT1G01060	1	protein_coding	LHY (LATE ELONGATED HYPOCOTYL); DNA binding / transcription factor	LHY encodes a myb-related putative transcription factor involved in circadian rhythm along with another myb transcription factor CCA1	LATE ELONGATED HYPOCOTYL (LHY); FUNCTIONS IN: transcription factor activity, DNA binding; INVOLVED IN: in 11 processes; EXPRESSED IN: 22 plant structures; EXPRESSED DURING: 13 growth stages; CONTAINS InterPro DOMAIN/s: SANT, DNA-binding (InterPro:IPR001005), Homeodomain-like (InterPro:IPR009057), Myb, DNA-binding (InterPro:IPR014778), Myb-like DNA-binding region, SHAQKYF class (InterPro:IPR006447…	---	---	---	GO:0003677 | GO:0003700 | GO:0003700	DNA binding | transcription factor activity | transcription factor activity	Communication:501714663 | Publication:1345963|PMID:11118137 | Publication:2432|PMID:9657154	GO:0009651 | GO:0009723 | GO:0009733 | GO:0009737 | GO:0009739 | GO:0009751 | GO:0009753 | GO:0042752 | GO:0045449 | GO:0046686 | GO:0048574	response to salt stress | response to ethylene stimulus | response to auxin stimulus | response to abscisic acid stimulus | response to gibberellin stimulus | response to salicylic acid stimulus | response to jasmonic acid stimulus | regulation of circadian rhythm | regulation of transcription | response to cadmium ion | "long-day photoperiodism, flowering"	Publication:501718564|PMID:16463103 | Publication:501718564|PMID:16463103 | Publication:501718564|PMID:16463103 | Publication:501718564|PMID:16463103 | Publication:501718564|PMID:16463103 | Publication:501718564|PMID:16463103 | Publication:501718564|PMID:16463103 | Publication:501681442|PMID:0012007421 | Publication:1345963|PMID:11118137 | Publication:501718564|PMID:16463103 | Publication:5017291…	LHY1	3234	19782	26282	23032	11379	10223	10801	46903	46427	46665	5492	6548	6020	3454	3781	3617.5	188	306	247	16716	18553	17634.5	8916	7982	8449	26401	30591	28496
REF3	AT2G30490	AT2G30490	31	91	1	AT2G30490	1	protein_coding	C4H (CINNAMATE-4-HYDROXYLASE); trans-cinnamate 4-monooxygenase	Encodes a cinnamate-4-hydroxylase.	CINNAMATE-4-HYDROXYLASE (C4H); FUNCTIONS IN: trans-cinnamate 4-monooxygenase activity; INVOLVED IN: phenylpropanoid biosynthetic process, response to light stimulus, response to wounding; LOCATED IN: endoplasmic reticulum, plasma membrane, membrane, plant-type cell wall; EXPRESSED IN: 25 plant structures; EXPRESSED DURING: 14 growth stages; CONTAINS InterPro DOMAIN/s: Cytochrome P450 (InterPro:IP…	GO:0005783 | GO:0005783 | GO:0005886 | GO:0005886 | GO:0005886 | GO:0009505 | GO:0016020	endoplasmic reticulum | endoplasmic reticulum | plasma membrane | plasma membrane | plasma membrane | plant-type cell wall | membrane	Publication:3403|PMID:9085571 | Publication:501718909|PMID:16618929 | Publication:501720626|PMID:17151019 | Publication:501720929|PMID:17317660 | Publication:501722708|PMID:17644812 | Publication:501718077|PMID:16287169 | Publication:501721401|PMID:17432890	GO:0016710	trans-cinnamate 4-monooxygenase activity	Publication:3403|PMID:9085571	GO:0009416 | GO:0009416 | GO:0009555 | GO:0009611 | GO:0009698 | GO:0009699 | GO:0009699 | GO:0009808 | GO:0032502 | GO:0040007	response to light stimulus | response to light stimulus | pollen development | response to wounding | phenylpropanoid metabolic process | phenylpropanoid biosynthetic process | phenylpropanoid biosynthetic process | lignin metabolic process | developmental process | growth	Publication:3403|PMID:9085571 | Publication:3404|PMID:9085570 | Publication:501733890|PMID:19682296 | Publication:3404|PMID:9085570 | Publication:501733890|PMID:19682296 | Publication:3403|PMID:9085571 | Publication:3404|PMID:9085570 | Publication:501733890|PMID:19682296 | Publication:501733890|PMID:19682296 | Publication:501733890|PMID:19682296	REF3	1803	11029	12561	11795	16599	15892	16245.5	4669	4983	4826	4987	7584	6285.5	4897	5631	5264	2344	3064	2704	15293	18569	16931	10250	9117	9683.5	9589	10943	10266
SOB7	AT1G17060	AT1G17060	30	13	1	AT1G17060	1	protein_coding	CYP72C1 (CYTOCHROME P450 72C1); electron carrier/ heme binding / iron ion binding / monooxygenase/ oxygen binding	Encodes a protein with similarity to other cytochrome P450's and is a homolog of BAS1. Over expression causes a dwarf phenotype resembling brassinolide resistant mutants. Double mutant analysis of sob7/bas1 loss of function mutants suggests these genes have redundant functions in light responsiveness. SOB7 may function in metabolizing brassinolides. Expressed in leaf, root, stem and silique but e…	CYTOCHROME P450 72C1 (CYP72C1); FUNCTIONS IN: electron carrier activity, monooxygenase activity, iron ion binding, oxygen binding, heme binding; INVOLVED IN: response to light stimulus, unidimensional cell growth, brassinosteroid metabolic process; LOCATED IN: endomembrane system; EXPRESSED IN: 10 plant structures; EXPRESSED DURING: 6 growth stages; CONTAINS InterPro DOMAIN/s: Cytochrome P450 (In…	GO:0012505	endomembrane system	AnalysisReference:501730133	GO:0004497 | GO:0005506 | GO:0009055 | GO:0019825 | GO:0020037	monooxygenase activity | iron ion binding | electron carrier activity | oxygen binding | heme binding	AnalysisReference:501730468 | AnalysisReference:501730468 | AnalysisReference:501730468 | Communication:501714663 | AnalysisReference:501730468	GO:0009416 | GO:0009826 | GO:0016131 | GO:0016131	response to light stimulus | unidimensional cell growth | brassinosteroid metabolic process | brassinosteroid metabolic process	Publication:501715001|PMID:15773851 | Publication:501715017|PMID:15773850 | Publication:501715001|PMID:15773851 | Publication:501714567|PMID:15689343	SOB7	1817	58	74	66	182	136	159	248	283	265.5	130	207	168.5	145	164	154.5	177	231	204	92	98	95	212	155	183.5	85	103	94
PRR7	AT5G02810	AT5G02810	30	350	1	NA	NA	protein_coding	PRR7 (PSEUDO-RESPONSE REGULATOR 7); transcription regulator/ two-component response regulator	PRR7 and PRR9 are partially redundant essential components of a temperature-sensitive circadian system. CCA1 and LHY had a positive effect on PRR7 expression levels.	PSEUDO-RESPONSE REGULATOR 7 (PRR7); FUNCTIONS IN: transcription regulator activity, two-component response regulator activity; INVOLVED IN: red or far red light signaling pathway, response to temperature stimulus, circadian rhythm; LOCATED IN: mitochondrion, nucleus; EXPRESSED IN: 24 plant structures; EXPRESSED DURING: 13 growth stages; CONTAINS InterPro DOMAIN/s: CheY-like (InterPro:IPR011006), …	GO:0005634 | GO:0005739	nucleus | mitochondrion	Publication:501711256|PMID:14563930 | Publication:501711651|PMID:14671022	GO:0000156 | GO:0030528	two-component response regulator activity | transcription regulator activity	Communication:1675000 | Publication:501681565|PMID:12068096	GO:0007623 | GO:0007623 | GO:0009266 | GO:0010017	circadian rhythm | circadian rhythm | response to temperature stimulus | red or far red light signaling pathway	Publication:501714580|PMID:15695441 | Publication:501683132|PMID:11100772 | Publication:501715037|PMID:15767265 | Publication:501711256|PMID:14563930	PRR7	2831	443	573	508	1153	903	1028	308	340	324	1502	2221	1861.5	3123	4226	3674.5	6555	9393	7974	753	734	743.5	1264	1078	1171	548	657	602.5
AT5G54630	AT5G54630	AT5G54630	30	383	1	NA	NA	protein_coding	zinc finger protein-related	---	zinc finger protein-related; FUNCTIONS IN: transcription factor activity; INVOLVED IN: regulation of transcription; LOCATED IN: intracellular; EXPRESSED IN: 21 plant structures; EXPRESSED DURING: 13 growth stages; CONTAINS InterPro DOMAIN/s: Zinc finger, C2H2-like (InterPro:IPR015880), Zinc finger, C2H2-type (InterPro:IPR007087); BEST Arabidopsis thaliana protein match is: zinc finger (C2H2 type)…	GO:0005622	intracellular	AnalysisReference:501730468	GO:0003700	transcription factor activity	Publication:1345963|PMID:11118137	GO:0045449	regulation of transcription	Publication:1345963|PMID:11118137	AT5G54630	1575	628	635	631.5	816	661	738.5	358	310	334	847	1042	944.5	1217	1529	1373	1342	1831	1586.5	1077	1209	1143	1009	813	911	531	630	580.5
4CL3	AT1G65060	AT1G65060	29	42	1	AT1G65060	1	protein_coding	4CL3; 4-coumarate-CoA ligase	encodes an isoform of 4-coumarate:CoA ligase (4CL), which is involved in the last step of the general phenylpropanoid pathway. mRNA levels are not induced in response to wounding or to fungal infection by P. parasitica. mRNA is expressed in flowers, to a lesser degree in mature leaves and siliques and marginally in seedling roots and bolting stems of mature plants. The catalytic efficiency was in…	4CL3; FUNCTIONS IN: 4-coumarate-CoA ligase activity; INVOLVED IN: phenylpropanoid metabolic process, response to UV, defense response to fungus, response to wounding, pollen exine formation; LOCATED IN: cellular_component unknown; EXPRESSED IN: 16 plant structures; EXPRESSED DURING: 11 growth stages; CONTAINS InterPro DOMAIN/s: AMP-dependent synthetase and ligase (InterPro:IPR000873); BEST Arabid…	GO:0005575	cellular_component	Communication:1345790	GO:0016207 | GO:0016207	4-coumarate-CoA ligase activity | 4-coumarate-CoA ligase activity	Publication:1317|PMID:10417722 | Publication:1317|PMID:10417722	GO:0009411 | GO:0009698 | GO:0009698 | GO:0010584	response to UV | phenylpropanoid metabolic process | phenylpropanoid metabolic process | pollen exine formation	Publication:1317|PMID:10417722 | Publication:1317|PMID:10417722 | Publication:1317|PMID:10417722 | Communication:501724251	4CL3	2081	1897	1917	1907	1764	1694	1729	496	355	425.5	355	472	413.5	322	323	322.5	106	142	124	2419	4289	3354	1010	830	920	1480	1610	1545
MIPS2	AT2G22240	AT2G22240	29	86	1	AT2G22240	1	protein_coding	MIPS2 (MYO-INOSITOL-1-PHOSTPATE SYNTHASE 2); binding / catalytic/ inositol-3-phosphate synthase	** Referred to as MIPS1 in Mitsuhashi et al 2008. Myo-inositol-1-phosphate synthase isoform 2. Expressed in leaf, root and silique. Immunolocaliazation experiments with an antibody recognizing MIPS1, MIPS2, and MIPS3 showed endosperm localization.	MYO-INOSITOL-1-PHOSTPATE SYNTHASE 2 (MIPS2); FUNCTIONS IN: binding, inositol-3-phosphate synthase activity, catalytic activity; INVOLVED IN: in 9 processes; LOCATED IN: cellular_component unknown; EXPRESSED IN: 25 plant structures; EXPRESSED DURING: 13 growth stages; CONTAINS InterPro DOMAIN/s: Myo-inositol-1-phosphate synthase (InterPro:IPR002587), Myo-inositol-1-phosphate synthase, GAPDH-like (…	GO:0005575	cellular_component	Communication:1345790	GO:0003824 | GO:0004512 | GO:0004512 | GO:0005488	catalytic activity | inositol-3-phosphate synthase activity | inositol-3-phosphate synthase activity | binding	AnalysisReference:501730468 | Communication:501714663 | AnalysisReference:501730468 | AnalysisReference:501730468	GO:0006021 | GO:0008654 | GO:0009408 | GO:0009644 | GO:0010264 | GO:0042542 | GO:0042742 | GO:0050832 | GO:0051607	inositol biosynthetic process | phospholipid biosynthetic process | response to heat | response to high light intensity | myo-inositol hexakisphosphate biosynthetic process | response to hydrogen peroxide | defense response to bacterium | defense response to fungus | defense response to virus	Communication:501714663 | Communication:501714663 | Publication:501720058|PMID:17059409 | Publication:501720058|PMID:17059409 | Publication:501727287|PMID:18643983 | Publication:501720058|PMID:17059409 | Publication:501727287|PMID:18643983 | Publication:501727287|PMID:18643983 | Publication:501727287|PMID:18643983	MIPS2	1985	1607	2660	2133.5	2539	2557	2548	666	923	794.5	1187	1799	1493	1144	1563	1353.5	402	561	481.5	3134	2586	2860	2186	2129	2157.5	2101	2257	2179
ATTZF1	AT2G25900	AT2G25900	29	284	2	NA	NA	protein_coding	ATCTH; transcription factor	putative Cys3His zinc finger protein (ATCTH) mRNA, complete	ATCTH; FUNCTIONS IN: transcription factor activity; INVOLVED IN: regulation of transcription; EXPRESSED IN: 21 plant structures; EXPRESSED DURING: 13 growth stages; CONTAINS InterPro DOMAIN/s: Zinc finger, CCCH-type (InterPro:IPR000571); BEST Arabidopsis thaliana protein match is: zinc finger (CCCH-type) family protein (TAIR:AT2G19810.1); Has 530 Blast hits to 507 proteins in 97 species: Archae -…	---	---	---	GO:0003700	transcription factor activity	Publication:1345963|PMID:11118137	GO:0045449	regulation of transcription	Publication:1345963|PMID:11118137	ATTZF1	1787	195	170	182.5	467	396	431.5	92	85	88.5	575	880	727.5	1279	1571	1425	1536	2575	2055.5	253	302	277.5	933	743	838	167	215	191
SHM4	AT4G13930	AT4G13930	29	400	1	NA	NA	protein_coding	SHM4 (serine hydroxymethyltransferase 4); catalytic/ glycine hydroxymethyltransferase/ pyridoxal phosphate binding	Encodes a serine hydroxymethyltransferase maximally expressed in root	serine hydroxymethyltransferase 4 (SHM4); FUNCTIONS IN: pyridoxal phosphate binding, glycine hydroxymethyltransferase activity, catalytic activity; INVOLVED IN: response to cadmium ion, glycine metabolic process, L-serine metabolic process; LOCATED IN: cytosol, plasma membrane, membrane; EXPRESSED IN: 9 plant structures; EXPRESSED DURING: seedling growth; CONTAINS InterPro DOMAIN/s: Pyridoxal pho…	GO:0005829 | GO:0005886 | GO:0016020	cytosol | plasma membrane | membrane	Publication:437|PMID:10806255 | Publication:501722708|PMID:17644812 | Publication:501721401|PMID:17432890	GO:0003824 | GO:0004372 | GO:0004372 | GO:0030170	catalytic activity | glycine hydroxymethyltransferase activity | glycine hydroxymethyltransferase activity | pyridoxal phosphate binding	AnalysisReference:501730468 | Communication:501714663 | AnalysisReference:501730468 | AnalysisReference:501730468	GO:0006544 | GO:0006563 | GO:0046686	glycine metabolic process | L-serine metabolic process | response to cadmium ion	Communication:501714663 | Communication:501714663 | Publication:501718481|PMID:16502469	SHM4	1822	12313	15654	13983.5	16315	17013	16664	8065	8683	8374	6268	8880	7574	6741	7931	7336	4355	6085	5220	17796	19269	18532.5	13372	11429	12400.5	14329	16079	15204
AT1G26790	AT1G26790	AT1G26790	28	249	2	NA	NA	protein_coding	Dof-type zinc finger domain-containing protein	---	Dof-type zinc finger domain-containing protein; FUNCTIONS IN: transcription factor activity, DNA binding; INVOLVED IN: regulation of transcription; LOCATED IN: endomembrane system; EXPRESSED IN: stem; CONTAINS InterPro DOMAIN/s: Zinc finger, Dof-type (InterPro:IPR003851); BEST Arabidopsis thaliana protein match is: Dof-type zinc finger domain-containing protein (TAIR:AT1G69570.1); Has 675 Blast h…	GO:0012505	endomembrane system	AnalysisReference:501730133	GO:0003677 | GO:0003700 | GO:0003700	DNA binding | transcription factor activity | transcription factor activity	Communication:501714663 | Publication:1345963|PMID:11118137 | Publication:501682896|PMID:12475498	GO:0045449	regulation of transcription	Publication:1345963|PMID:11118137	AT1G26790	1191	1229	1425	1327	994	799	896.5	2360	2237	2298.5	437	536	486.5	202	183	192.5	6	7	6.5	1321	1609	1465	866	659	762.5	1518	1802	1660
CYP85A2	AT3G30180	AT3G30180	28	471	1	NA	NA	protein_coding	BR6OX2 (BRASSINOSTEROID-6-OXIDASE 2); monooxygenase/ oxygen binding	Encodes a cytochrome p450 enzyme that catalyzes the last reaction in the production of brassinolide. It is capable of converting 6-deoxocastasterone into castasterone, a C-6 oxidation, as well as the further conversion of castasterone into brassinolide by a Baeyer-Villinger oxidation reaction at C-6, resulting in the formation of an unusual seven-membered lactone ring. The enzyme possesses high a…	BRASSINOSTEROID-6-OXIDASE 2 (BR6OX2); FUNCTIONS IN: monooxygenase activity, oxygen binding; INVOLVED IN: response to light stimulus, circadian rhythm, brassinosteroid biosynthetic process; LOCATED IN: endomembrane system; EXPRESSED IN: 24 plant structures; EXPRESSED DURING: 14 growth stages; CONTAINS InterPro DOMAIN/s: Cytochrome P450 (InterPro:IPR001128), Cytochrome P450, C-terminal region (Inte…	GO:0012505	endomembrane system	AnalysisReference:501730133	GO:0004497 | GO:0004497 | GO:0019825	monooxygenase activity | monooxygenase activity | oxygen binding	Publication:501714744|PMID:15710611 | Publication:501717373|PMID:16024588 | Communication:501714663	GO:0016132	brassinosteroid biosynthetic process	Publication:501714744|PMID:15710611	CYP85A2	1784	944	1078	1011	347	303	325	1335	1320	1327.5	441	386	413.5	601	542	571.5	337	435	386	467	541	504	257	235	246	1291	1447	1369
SNP2	AT3G50660	AT3G50660	28	477	1	NA	NA	protein_coding	DWF4 (DWARF 4); steroid 22-alpha hydroxylase	Encodes a 22&#945; hydroxylase whose reaction is a rate-limiting step in brassinosteroid biosynthetic pathway. The protein is a member of CYP90B gene family. CLM is an epi-allele with small, compressed rosette, reduced internode length, and reduced fertility, appears in selfed ddm mutant plants possibly due to loss of cytosine methylation. Transcripts accumulate in actively growing tissues, and G…	DWARF 4 (DWF4); FUNCTIONS IN: steroid 22-alpha hydroxylase activity; INVOLVED IN: leaf shaping, response to brassinosteroid stimulus, leaf development, unidimensional cell growth, brassinosteroid biosynthetic process; LOCATED IN: endoplasmic reticulum; EXPRESSED IN: 26 plant structures; EXPRESSED DURING: 14 growth stages; CONTAINS InterPro DOMAIN/s: Cytochrome P450 (InterPro:IPR001128), Cytochrom…	GO:0005783	endoplasmic reticulum	Publication:501718411|PMID:16407451	GO:0010012 | GO:0010012	steroid 22-alpha hydroxylase activity | steroid 22-alpha hydroxylase activity	Publication:501718590|PMID:16460510 | Publication:501680127|PMID:11319239	GO:0009741 | GO:0009741 | GO:0009826 | GO:0010358 | GO:0016132 | GO:0016132 | GO:0048366	response to brassinosteroid stimulus | response to brassinosteroid stimulus | unidimensional cell growth | leaf shaping | brassinosteroid biosynthetic process | brassinosteroid biosynthetic process | leaf development	Publication:501718411|PMID:16407451 | Publication:501718411|PMID:16407451 | Publication:2665|PMID:9490745 | Publication:501728640|PMID:17908154 | Publication:2664|PMID:9490746 | Publication:2664|PMID:9490746 | Publication:501728640|PMID:17908154	SNP2	1740	321	377	349	396	287	341.5	805	765	785	473	492	482.5	545	594	569.5	449	513	481	379	418	398.5	173	183	178	1036	1367	1201.5
ACBP3	AT4G24230	AT4G24230	28	154	1	AT4G24230	1	protein_coding	ACBP3 (ACYL-COA-BINDING DOMAIN 3); acyl-CoA binding	acyl-CoA-binding protein ACBP3. Localized extracellularly in transiently expressed tobacco BY-2 cells and onion epidermal cells. Binds arachidonyl-CoA with high affinity.	ACYL-COA-BINDING DOMAIN 3 (ACBP3); FUNCTIONS IN: acyl-CoA binding; INVOLVED IN: fatty acid transport; LOCATED IN: extracellular region; EXPRESSED IN: 6 plant structures; CONTAINS InterPro DOMAIN/s: Acyl-CoA-binding protein, ACBP (InterPro:IPR000582), FERM/acyl-CoA-binding protein, 3-helical bundle (InterPro:IPR014352); BEST Arabidopsis thaliana protein match is: ACBP1 (ACYL-COA BINDING PROTEIN 1)…	GO:0005576	extracellular region	Publication:501717890|PMID:16231156	GO:0000062 | GO:0000062	acyl-CoA binding | acyl-CoA binding	Publication:501717890|PMID:16231156 | Communication:501714663	GO:0015908	fatty acid transport	Publication:501717890|PMID:16231156	ACBP3	1786	172	203	187.5	226	217	221.5	626	658	642	239	388	313.5	392	497	444.5	480	651	565.5	165	201	183	268	225	246.5	187	234	210.5
LCL1	AT5G02840	AT5G02840	28	351	1	NA	NA	protein_coding	LCL1 (LHY/CCA1-like 1); DNA binding / transcription factor	CCA1 and LHY colocalize in the nucleus and form heterodimers in vivo. CCA1 and LHY function synergistically in regulating circadian rhythms of Arabidopsis.	LHY/CCA1-like 1 (LCL1); FUNCTIONS IN: transcription factor activity, DNA binding; INVOLVED IN: in 10 processes; LOCATED IN: nucleus; EXPRESSED IN: 27 plant structures; EXPRESSED DURING: 15 growth stages; CONTAINS InterPro DOMAIN/s: SANT, DNA-binding (InterPro:IPR001005), Homeodomain-like (InterPro:IPR009057), Myb, DNA-binding (InterPro:IPR014778), Myb-type HTH DNA-binding domain (InterPro:IPR0179…	GO:0005634	nucleus	Publication:501729854|PMID:19218364	GO:0003677 | GO:0003700 | GO:0003700	DNA binding | transcription factor activity | transcription factor activity	Communication:501714663 | Communication:501714663 | Publication:1345963|PMID:11118137	GO:0006355 | GO:0007623 | GO:0009651 | GO:0009723 | GO:0009733 | GO:0009737 | GO:0009739 | GO:0009751 | GO:0009753 | GO:0046686	regulation of transcription, DNA-dependent | circadian rhythm | response to salt stress | response to ethylene stimulus | response to auxin stimulus | response to abscisic acid stimulus | response to gibberellin stimulus | response to salicylic acid stimulus | response to jasmonic acid stimulus | response to cadmium ion	Communication:501714663 | Publication:501729854|PMID:19218364 | Publication:501718564|PMID:16463103 | Publication:501718564|PMID:16463103 | Publication:501718564|PMID:16463103 | Publication:501718564|PMID:16463103 | Publication:501718564|PMID:16463103 | Publication:501718564|PMID:16463103 | Publication:501718564|PMID:16463103 | Publication:501718564|PMID:16463103	LCL1	1623	2142	2872	2507	2147	1927	2037	7117	7529	7323	1800	2421	2110.5	1862	2508	2185	1191	1568	1379.5	2249	2365	2307	2206	1807	2006.5	2582	3023	2802.5
RHS5	AT1G34760	AT1G34760	27	1319	2	NA	NA	protein_coding	GRF11 (GENERAL REGULATORY FACTOR 11); ATPase binding / amino acid binding / protein binding / protein phosphorylated amino acid binding	Encodes a 14-3-3 protein. Binds H+-ATPase in response to blue light.	GENERAL REGULATORY FACTOR 11 (GRF11); FUNCTIONS IN: protein phosphorylated amino acid binding, protein binding, amino acid binding, ATPase binding; LOCATED IN: cellular_component unknown; EXPRESSED IN: 7 plant structures; EXPRESSED DURING: 4 leaf senescence stage; CONTAINS InterPro DOMAIN/s: 14-3-3 protein (InterPro:IPR000308); BEST Arabidopsis thaliana protein match is: GRF10 (GENERAL REGULATORY…	GO:0005575	cellular_component	Communication:1345790	GO:0005515 | GO:0005515 | GO:0016597 | GO:0045309 | GO:0051117	protein binding | protein binding | amino acid binding | protein phosphorylated amino acid binding | ATPase binding	Publication:501681748 | Publication:501681748 | Publication:501683240|PMID:10836149 | Publication:834|PMID:10631267 | Publication:501716548|PMID:15821287	---	---	---	RHS5	1054	303	409	356	172	136	154	1209	1218	1213.5	183	226	204.5	232	292	262	223	320	271.5	185	190	187.5	193	198	195.5	375	460	417.5
NR2	AT1G37130	AT1G37130	27	19	1	AT1G37130	1	protein_coding	NIA2 (NITRATE REDUCTASE 2); nitrate reductase (NADH)/ nitrate reductase	Identified as a mutant resistant to chlorate. Encodes nitrate reductase structural gene. Involved in nitrate assimilation. Has nitrate reductase activity. Up-regulated by the fungus P. indica. Binds transcription factor At2g35940.	NITRATE REDUCTASE 2 (NIA2); FUNCTIONS IN: nitrate reductase activity, nitrate reductase (NADH) activity; INVOLVED IN: nitrate assimilation, nitric oxide biosynthetic process, response to light stimulus, response to symbiotic fungus; LOCATED IN: plasma membrane, vacuole; EXPRESSED IN: 25 plant structures; EXPRESSED DURING: 13 growth stages; CONTAINS InterPro DOMAIN/s: Cytochrome b5, heme-binding s…	GO:0005773 | GO:0005886	vacuole | plasma membrane	Publication:501714874|PMID:15539469 | Publication:501720929|PMID:17317660	GO:0008940 | GO:0008940 | GO:0008940 | GO:0008940 | GO:0008940 | GO:0009703 | GO:0009703	nitrate reductase activity | nitrate reductase activity | nitrate reductase activity | nitrate reductase activity | nitrate reductase activity | nitrate reductase (NADH) activity | nitrate reductase (NADH) activity	Publication:4866|PMID:8182055 | Publication:4866|PMID:8182055 | Publication:5539|PMID:1840922 | Publication:5712|PMID:2905260 | Publication:5712|PMID:2905260 | Publication:4866|PMID:8182055 | Publication:4866|PMID:8182055	GO:0006809 | GO:0009416 | GO:0009610 | GO:0042128	nitric oxide biosynthetic process | response to light stimulus | response to symbiotic fungus | nitrate assimilation	Publication:501682465|PMID:0012446847 | Publication:501716328|PMID:15908593 | Publication:501721500|PMID:17397506 | Publication:5194|PMID:8510658	NR2	3130	17638	21230	19434	39394	31596	35495	85540	84771	85155.5	30237	40711	35474	21832	24120	22976	16366	20783	18574.5	17513	20369	18941	20038	22135	21086.5	34095	44830	39462.5
AT4CL1	AT1G51680	AT1G51680	27	24	2	AT1G51680	2	protein_coding	4CL1 (4-COUMARATE:COA LIGASE 1); 4-coumarate-CoA ligase	encodes an isoform of 4-coumarate:CoA ligase (4CL), which is involved in the last step of the general phenylpropanoid pathway. In addition to 4-coumarate, it also converts ferulate. The catalytic efficiency was in the following (descending) order: p-coumaric acid, ferulic acid, caffeic acid and 5-OH-ferulic acid. At4CL1 was unable to use sinapic acid as substrate.	4-COUMARATE:COA LIGASE 1 (4CL1); FUNCTIONS IN: 4-coumarate-CoA ligase activity; INVOLVED IN: phenylpropanoid metabolic process, response to UV, response to fungus, response to wounding; LOCATED IN: cellular_component unknown; EXPRESSED IN: 23 plant structures; EXPRESSED DURING: 13 growth stages; CONTAINS InterPro DOMAIN/s: AMP-dependent synthetase and ligase (InterPro:IPR000873); BEST Arabidopsis…	GO:0005575	cellular_component	Communication:1345790	GO:0016207 | GO:0016207	4-coumarate-CoA ligase activity | 4-coumarate-CoA ligase activity	Publication:1317|PMID:10417722 | Publication:1317|PMID:10417722	GO:0009411 | GO:0009611 | GO:0009620 | GO:0009698 | GO:0009698	response to UV | response to wounding | response to fungus | phenylpropanoid metabolic process | phenylpropanoid metabolic process	Publication:1317|PMID:10417722 | Publication:1317|PMID:10417722 | Publication:1317|PMID:10417722 | Publication:1317|PMID:10417722 | Publication:1317|PMID:10417722	AT4CL1	2258	7751	9074	8412.5	13217	13485	13351	2510	2643	2576.5	4455	6519	5487	5190	6005	5597.5	3022	3804	3413	12413	14731	13572	7694	5783	6738.5	6140	7082	6611
MYBL2	AT1G71030	AT1G71030	27	264	2	NA	NA	protein_coding	MYBL2 (ARABIDOPSIS MYB-LIKE 2); DNA binding / transcription factor	Encodes a putative myb family transcription factor. In contrast to most other myb-like proteins its myb domain consists of a single repeat. A proline-rich region potentially involved in transactivation is found in the C-terminal part of the protein. Its transcript accumulates mainly in leaves.	ARABIDOPSIS MYB-LIKE 2 (MYBL2); FUNCTIONS IN: transcription factor activity, DNA binding; INVOLVED IN: in 11 processes; EXPRESSED IN: 20 plant structures; EXPRESSED DURING: 13 growth stages; CONTAINS InterPro DOMAIN/s: SANT, DNA-binding (InterPro:IPR001005), Homeodomain-like (InterPro:IPR009057), Myb, DNA-binding (InterPro:IPR014778), Myb-type HTH DNA-binding domain (InterPro:IPR017930), Homeodom…	---	---	---	GO:0003677 | GO:0003700 | GO:0003700	DNA binding | transcription factor activity | transcription factor activity	Communication:501714663 | Communication:501714663 | Publication:1345963|PMID:11118137	GO:0006355 | GO:0009644 | GO:0009651 | GO:0009718 | GO:0009723 | GO:0009737 | GO:0009739 | GO:0009751 | GO:0009753 | GO:0010023 | GO:0046686	regulation of transcription, DNA-dependent | response to high light intensity | response to salt stress | anthocyanin biosynthetic process | response to ethylene stimulus | response to abscisic acid stimulus | response to gibberellin stimulus | response to salicylic acid stimulus | response to jasmonic acid stimulus | proanthocyanidin biosynthetic process | response to cadmium ion	Communication:501714663 | Publication:501725206|PMID:18532977 | Publication:501718564|PMID:16463103 | Publication:501725206|PMID:18532977 | Publication:501718564|PMID:16463103 | Publication:501718564|PMID:16463103 | Publication:501718564|PMID:16463103 | Publication:501718564|PMID:16463103 | Publication:501718564|PMID:16463103 | Publication:501725206|PMID:18532977 | Publication:501718564|PMID:1646…	MYBL2	986	85	121	103	297	235	266	40	58	49	488	759	623.5	1032	1547	1289.5	1904	3029	2466.5	191	148	169.5	803	583	693	100	94	97
Toc12	AT1G80920	AT1G80920	27	75	2	AT1G80920	2	protein_coding	J8; heat shock protein binding / unfolded protein binding	J8 mRNA, nuclear gene encoding plastid protein, complete	J8; FUNCTIONS IN: unfolded protein binding, heat shock protein binding; INVOLVED IN: protein folding; LOCATED IN: chloroplast; EXPRESSED IN: 24 plant structures; EXPRESSED DURING: 15 growth stages; CONTAINS InterPro DOMAIN/s: Molecular chaperone, heat shock protein, Hsp40, DnaJ (InterPro:IPR015609), Heat shock protein DnaJ, N-terminal (InterPro:IPR001623), Heat shock protein DnaJ (InterPro:IPR003…	GO:0009507	chloroplast	AnalysisReference:501730133	GO:0031072 | GO:0051082	heat shock protein binding | unfolded protein binding	AnalysisReference:501730468 | AnalysisReference:501730468	GO:0006457 | GO:0006457	protein folding | protein folding	Communication:501714663 | AnalysisReference:501730468	Toc12	852	409	364	386.5	551	452	501.5	247	210	228.5	515	672	593.5	1131	1323	1227	2227	3166	2696.5	338	412	375	743	542	642.5	341	425	383
PFA-DSP2	AT2G32960	AT2G32960	27	1555	1	NA	NA	protein_coding	tyrosine specific protein phosphatase family protein	---	tyrosine specific protein phosphatase family protein; FUNCTIONS IN: phosphatase activity, protein tyrosine phosphatase activity, catalytic activity; INVOLVED IN: dephosphorylation; LOCATED IN: cellular_component unknown; CONTAINS InterPro DOMAIN/s: Protein-tyrosine phosphatase, active site (InterPro:IPR016130), Protein-tyrosine phosphatase (InterPro:IPR000387), Protein-tyrosine phosphatase, SIW14…	GO:0005575	cellular_component	Communication:1345790	GO:0003824 | GO:0004725 | GO:0016791	catalytic activity | protein tyrosine phosphatase activity | phosphatase activity	Communication:501714663 | AnalysisReference:501730468 | AnalysisReference:501730468	GO:0016311	dephosphorylation	AnalysisReference:501730468	PFA-DSP2	1239	181	237	209	162	154	158	307	282	294.5	83	110	96.5	63	78	70.5	27	36	31.5	177	207	192	73	56	64.5	237	279	258
PAL1	AT2G37040	AT2G37040	27	103	1	AT2G37040	1	protein_coding	pal1 (Phe ammonia lyase 1); phenylalanine ammonia-lyase	encodes a protein similar to phenylalanine ammonia-lyase	Phe ammonia lyase 1 (pal1); FUNCTIONS IN: phenylalanine ammonia-lyase activity; INVOLVED IN: response to oxidative stress, phenylpropanoid biosynthetic process, response to wounding, defense response; LOCATED IN: cytoplasm; EXPRESSED IN: 22 plant structures; EXPRESSED DURING: 13 growth stages; CONTAINS InterPro DOMAIN/s: Phenylalanine/histidine ammonia-lyase (InterPro:IPR001106), L-Aspartase-like…	GO:0005737	cytoplasm	AnalysisReference:501730468	GO:0045548 | GO:0045548	phenylalanine ammonia-lyase activity | phenylalanine ammonia-lyase activity	Publication:501675229 | Publication:4577|PMID:7888622	GO:0006952 | GO:0006979 | GO:0009611 | GO:0009699	defense response | response to oxidative stress | response to wounding | phenylpropanoid biosynthetic process	Publication:4577|PMID:7888622 | Publication:501714511|PMID:15634198 | Publication:4577|PMID:7888622 | Publication:501675229	PAL1	2530	12139	12957	12548	18325	18719	18522	3388	3435	3411.5	5369	7752	6560.5	6577	7178	6877.5	3182	3616	3399	15168	26733	20950.5	10268	9588	9928	9635	10549	10092
HSP70	AT3G12580	AT3G12580	27	116	1	AT3G12580	1	protein_coding	HSP70 (heat shock protein 70); ATP binding	---	heat shock protein 70 (HSP70); FUNCTIONS IN: ATP binding; INVOLVED IN: in 8 processes; LOCATED IN: cytosol, mitochondrion, cell wall, plasma membrane; EXPRESSED IN: 23 plant structures; EXPRESSED DURING: 11 growth stages; CONTAINS InterPro DOMAIN/s: Heat shock protein 70, conserved site (InterPro:IPR018181), Heat shock protein Hsp70 (InterPro:IPR001023), Heat shock protein 70 (InterPro:IPR013126)…	GO:0005618 | GO:0005739 | GO:0005829 | GO:0005886 | GO:0005886 | GO:0005886	cell wall | mitochondrion | cytosol | plasma membrane | plasma membrane | plasma membrane	Publication:501718077|PMID:16287169 | Publication:501720283|PMID:17137349 | Publication:501680755|PMID:11402207 | Publication:501720626|PMID:17151019 | Publication:501720929|PMID:17317660 | Publication:501722708|PMID:17644812	GO:0005524	ATP binding	Publication:501720283|PMID:17137349	GO:0006457 | GO:0009408 | GO:0009408 | GO:0009615 | GO:0009617 | GO:0009644 | GO:0042542 | GO:0046686	protein folding | response to heat | response to heat | response to virus | response to bacterium | response to high light intensity | response to hydrogen peroxide | response to cadmium ion	Publication:501680755|PMID:11402207 | Publication:501720058|PMID:17059409 | Publication:501680755|PMID:11402207 | Publication:501714984|PMID:15805473 | Publication:501723792|PMID:18065690 | Publication:501720058|PMID:17059409 | Publication:501720058|PMID:17059409 | Publication:501718481|PMID:16502469	HSP70	2282	8745	14327	11536	12565	11261	11913	851	748	799.5	984	2121	1552.5	637	843	740	178	659	418.5	19594	9747	14670.5	5888	6260	6074	6631	6350	6490.5
SMZ	AT3G54990	AT3G54990	27	321	4	NA	NA	protein_coding	SMZ (SCHLAFMUTZE); DNA binding / transcription factor	Encodes a AP2 domain transcription factor that can repress flowering. SMZ and its paralogous gene, SNARCHZAPFEN (SNZ), share a signature with partial complementarity to the miR172 microRNA, whose precursor is induced upon flowering.	SCHLAFMUTZE (SMZ); FUNCTIONS IN: transcription factor activity, DNA binding; INVOLVED IN: multicellular organismal development, negative regulation of flower development, regulation of transcription, DNA-dependent; LOCATED IN: nucleus; EXPRESSED IN: 17 plant structures; EXPRESSED DURING: 9 growth stages; CONTAINS InterPro DOMAIN/s: DNA-binding, integrase-type (InterPro:IPR016177), Pathogenesis-re…	GO:0005634 | GO:0005634	nucleus | nucleus	Publication:101|PMID:10948255 | Publication:4759|PMID:7919989	GO:0003677 | GO:0003677 | GO:0003700 | GO:0003700 | GO:0003700	DNA binding | DNA binding | transcription factor activity | transcription factor activity | transcription factor activity	Communication:501714663 | Publication:501683170|PMID:7756828 | Communication:501714663 | Publication:4759|PMID:7919989 | Publication:1345963|PMID:11118137	GO:0006355 | GO:0006355 | GO:0007275	regulation of transcription, DNA-dependent | "regulation of transcription, DNA-dependent" | multicellular organismal development	Communication:501714663 | Publication:501683170|PMID:7756828 | Publication:3195|PMID:9192694	SMZ	1072	1623	1912	1767.5	644	586	615	1178	1163	1170.5	396	454	425	485	576	530.5	361	459	410	1089	985	1037	352	233	292.5	1734	2003	1868.5
BZIP61	AT3G58120	AT3G58120	27	325	2	NA	NA	protein_coding	BZIP61; DNA binding / transcription activator/ transcription factor	Encodes a member of the BZIP family of transcription factors. Forms heterodimers with the related protein AtbZIP34. Binds to G-boxes in vitro and is localized to the nucleus in onion epidermal cells.	BZIP61; FUNCTIONS IN: transcription factor activity, transcription activator activity, DNA binding; INVOLVED IN: regulation of transcription, DNA-dependent; LOCATED IN: nucleus; EXPRESSED IN: 20 plant structures; EXPRESSED DURING: 12 growth stages; CONTAINS InterPro DOMAIN/s: Basic-leucine zipper (bZIP) transcription factor (InterPro:IPR004827), Basic leucine zipper (InterPro:IPR011700); BEST Ara…	GO:0005634	nucleus	Publication:501722898|PMID:17719007	GO:0003677 | GO:0003700 | GO:0003700 | GO:0016563	DNA binding | transcription factor activity | transcription factor activity | transcription activator activity	Publication:501722898|PMID:17719007 | Publication:1345963|PMID:11118137 | Publication:1547369|PMID:11906833 | Publication:501722898|PMID:17719007	GO:0006355	regulation of transcription, DNA-dependent	AnalysisReference:501730468	BZIP61	1554	287	317	302	827	659	743	1682	1817	1749.5	930	1200	1065	946	1062	1004	1114	1611	1362.5	738	1231	984.5	1266	1169	1217.5	551	632	591.5
RSR4	AT5G01410	AT5G01410	27	175	1	AT5G01410	1	protein_coding	RSR4 (REDUCED SUGAR RESPONSE 4); protein heterodimerization/ protein homodimerization	Encodes a protein predicted to function in tandem with PDX2 to form glutamine amidotransferase complex with involved in vitamin B6 biosynthesis.	REDUCED SUGAR RESPONSE 4 (RSR4); FUNCTIONS IN: protein heterodimerization activity, protein homodimerization activity; INVOLVED IN: in 12 processes; LOCATED IN: cytosol, endomembrane system, plasma membrane; EXPRESSED IN: 26 plant structures; EXPRESSED DURING: 15 growth stages; CONTAINS InterPro DOMAIN/s: Vitamin B6 biosynthesis protein (InterPro:IPR001852), Ribulose-phosphate binding barrel (Int…	GO:0005829 | GO:0005886 | GO:0012505	cytosol | plasma membrane | endomembrane system	Publication:501717762|PMID:16157873 | Publication:501717882|PMID:16236150 | Publication:501717882|PMID:16236150	GO:0042803 | GO:0046982	protein homodimerization activity | protein heterodimerization activity	Publication:501719430|PMID:16766694 | Publication:501719430|PMID:16766694	GO:0006520 | GO:0006950 | GO:0006979 | GO:0006982 | GO:0008615 | GO:0009646 | GO:0009651 | GO:0010224 | GO:0010335 | GO:0015994 | GO:0042538 | GO:0042819	cellular amino acid metabolic process | response to stress | response to oxidative stress | response to lipid hydroperoxide | pyridoxine biosynthetic process | response to absence of light | response to salt stress | response to UV-B | response to non-ionic osmotic stress | chlorophyll metabolic process | hyperosmotic salinity response | vitamin B6 biosynthetic process	Publication:501719430|PMID:16766694 | Publication:501717882|PMID:16236150 | Publication:501717882|PMID:16236150 | Publication:501717882|PMID:16236150 | Publication:501717882|PMID:16236150 | Publication:501720767|PMID:17227548 | Publication:501720767|PMID:17227548 | Publication:501714274|PMID:15474373 | Publication:501720767|PMID:17227548 | Publication:501719430|PMID:16766694 | Publication:5017178…	RSR4	1297	15290	20921	18105.5	20039	19915	19977	11309	12606	11957.5	12805	18830	15817.5	13388	17527	15457.5	8474	11075	9774.5	20265	20686	20475.5	17974	15488	16731	18876	21229	20052.5
HSFB2A	AT5G62020	AT5G62020	27	390	1	NA	NA	protein_coding	AT-HSFB2A; DNA binding / transcription factor	member of Heat Stress Transcription Factor (Hsf) family	AT-HSFB2A; FUNCTIONS IN: transcription factor activity, DNA binding; INVOLVED IN: response to chitin; LOCATED IN: nucleus; EXPRESSED IN: 18 plant structures; EXPRESSED DURING: 11 growth stages; CONTAINS InterPro DOMAIN/s: Winged helix repressor DNA-binding (InterPro:IPR011991), Heat shock factor (HSF)-type, DNA-binding (InterPro:IPR000232); BEST Arabidopsis thaliana protein match is: AT-HSFB2B; t…	GO:0005634	nucleus	AnalysisReference:501730468	GO:0003677 | GO:0003700 | GO:0003700	DNA binding | transcription factor activity | transcription factor activity	Communication:501714663 | Communication:501714663 | Publication:1345963|PMID:11118137	GO:0010200	response to chitin	Publication:501722879|PMID:17722694	HSFB2A	1472	517	660	588.5	475	439	457	240	297	268.5	256	350	303	276	369	322.5	187	224	205.5	841	853	847	419	353	386	586	585	585.5
ERF11	AT1G28370	AT1G28370	26	250	1	NA	NA	protein_coding	ERF11 (ERF DOMAIN PROTEIN 11); DNA binding / transcription factor/ transcription repressor	encodes a member of the ERF (ethylene response factor) subfamily B-1 of ERF/AP2 transcription factor family. The protein contains one AP2 domain. There are 15 members in this subfamily including ATERF-3, ATERF-4, ATERF-7, and leafy petiole.	ERF DOMAIN PROTEIN 11 (ERF11); FUNCTIONS IN: transcription repressor activity, transcription factor activity, DNA binding; INVOLVED IN: ethylene mediated signaling pathway, regulation of transcription, DNA-dependent; LOCATED IN: nucleus; EXPRESSED IN: 19 plant structures; EXPRESSED DURING: 10 growth stages; CONTAINS InterPro DOMAIN/s: DNA-binding, integrase-type (InterPro:IPR016177), Pathogenesis…	GO:0005634	nucleus	Publication:501680601|PMID:11487705	GO:0003677 | GO:0003700 | GO:0003700 | GO:0003700 | GO:0016564	DNA binding | transcription factor activity | transcription factor activity | transcription factor activity | transcription repressor activity	Publication:501680601|PMID:11487705 | Publication:2298|PMID:9687012 | Publication:501680601|PMID:11487705 | Publication:1345963|PMID:11118137 | Publication:501680601|PMID:11487705	GO:0006355 | GO:0009873	regulation of transcription, DNA-dependent | ethylene mediated signaling pathway	Publication:501680601|PMID:11487705 | Publication:2298|PMID:9687012	ERF11	972	4	6	5	18	18	18	47	73	60	21	25	23	7	17	12	9	10	9.5	11	18	14.5	21	26	23.5	19	10	14.5
J3	AT3G44110	AT3G44110	26	136	1	AT3G44110	1	protein_coding	ATJ3; protein binding	homologous to the co-chaperon DNAJ protein from E coli	ATJ3; FUNCTIONS IN: protein binding; INVOLVED IN: protein folding; LOCATED IN: nucleolus, cell wall, plasma membrane; EXPRESSED IN: 26 plant structures; EXPRESSED DURING: 15 growth stages; CONTAINS InterPro DOMAIN/s: Molecular chaperone, heat shock protein, Hsp40, DnaJ (InterPro:IPR015609), HSP40/DnaJ peptide-binding (InterPro:IPR008971), Chaperone DnaJ, C-terminal (InterPro:IPR002939), Heat shoc…	GO:0005618 | GO:0005730 | GO:0005886 | GO:0005886	cell wall | nucleolus | plasma membrane | plasma membrane	Publication:501718077|PMID:16287169 | Publication:501714224|PMID:15496452 | Publication:501720929|PMID:17317660 | Publication:501722708|PMID:17644812	GO:0005515	protein binding	Publication:501675721	GO:0006457 | GO:0006457 | GO:0006457	protein folding | protein folding | protein folding	Communication:501714663 | Publication:501675721 | Publication:501675721	J3	1781	11215	12272	11743.5	10310	8521	9415.5	7409	6759	7084	3710	4724	4217	3843	4272	4057.5	3091	4150	3620.5	13976	12226	13101	7486	6060	6773	10960	11906	11433
SZF1	AT3G55980	AT3G55980	26	322	1	NA	NA	protein_coding	SZF1 (SALT-INDUCIBLE ZINC FINGER 1); transcription factor	---	SALT-INDUCIBLE ZINC FINGER 1 (SZF1); FUNCTIONS IN: transcription factor activity; INVOLVED IN: response to chitin, regulation of transcription; LOCATED IN: cellular_component unknown; EXPRESSED IN: 22 plant structures; EXPRESSED DURING: 13 growth stages; CONTAINS InterPro DOMAIN/s: Zinc finger, CCCH-type (InterPro:IPR000571), Ankyrin (InterPro:IPR002110); BEST Arabidopsis thaliana protein match i…	GO:0005575	cellular_component	Communication:1345790	GO:0003700	transcription factor activity	Publication:1345963|PMID:11118137	GO:0010200 | GO:0045449	response to chitin | regulation of transcription	Publication:501722879|PMID:17722694 | Publication:1345963|PMID:11118137	SZF1	2153	479	600	539.5	1824	1951	1887.5	3566	5360	4463	935	1487	1211	616	966	791	504	710	607	1546	1465	1505.5	1156	873	1014.5	1267	1008	1137.5
FTQ4	AT4G25470	AT4G25470	26	341	1	NA	NA	protein_coding	CBF2 (C-REPEAT/DRE BINDING FACTOR 2); DNA binding / transcription activator/ transcription factor	Encodes a member of the DREB subfamily A-1 of ERF/AP2 transcription factor family (CBF2). The protein contains one AP2 domain. There are six members in this subfamily, including CBF1, CBF2, and CBF3. This gene is involved in response to low temperature, abscisic acid, and circadian rhythm. Overexpressing this gene leads to increased freeze tolerance and induces the expression level of 85 cold-ind…	C-REPEAT/DRE BINDING FACTOR 2 (CBF2); FUNCTIONS IN: transcription factor activity, transcription activator activity, DNA binding; INVOLVED IN: cold acclimation, response to cold, response to abscisic acid stimulus, regulation of transcription, DNA-dependent, circadian rhythm; LOCATED IN: nucleus; EXPRESSED IN: 20 plant structures; EXPRESSED DURING: 7 growth stages; CONTAINS InterPro DOMAIN/s: DNA…	GO:0005634	nucleus	Communication:501714663	GO:0003677 | GO:0003700 | GO:0003700 | GO:0016563 | GO:0016563	DNA binding | transcription factor activity | transcription factor activity | transcription activator activity | transcription activator activity	Communication:501714663 | Communication:501714663 | Publication:1345963|PMID:11118137 | Publication:2251|PMID:9707537 | Publication:1804|PMID:9952441	GO:0006355 | GO:0009409 | GO:0009409 | GO:0009409 | GO:0009631	regulation of transcription, DNA-dependent | response to cold | response to cold | response to cold | cold acclimation	Communication:501714663 | Publication:2201|PMID:9735350 | Publication:1804|PMID:9952441 | Publication:501717819|PMID:16258011 | Publication:501713232|PMID:15356394	FTQ4	944	6	12	9	45	36	40.5	269	384	326.5	42	51	46.5	64	53	58.5	91	76	83.5	64	72	68	84	36	60	29	19	24
GNL	AT4G26150	AT4G26150	26	343	2	NA	NA	protein_coding	CGA1 (CYTOKININ-RESPONSIVE GATA FACTOR 1); transcription factor	---	CYTOKININ-RESPONSIVE GATA FACTOR 1 (CGA1); FUNCTIONS IN: transcription factor activity; INVOLVED IN: response to cytokinin stimulus; LOCATED IN: nucleus; EXPRESSED IN: 12 plant structures; EXPRESSED DURING: 6 growth stages; CONTAINS InterPro DOMAIN/s: Zinc finger, NHR/GATA-type (InterPro:IPR013088), Zinc finger, GATA-type (InterPro:IPR000679); BEST Arabidopsis thaliana protein match is: GNC (GATA…	GO:0005634	nucleus	AnalysisReference:501730468	GO:0003700 | GO:0003700	transcription factor activity | transcription factor activity	Communication:501714663 | Publication:1345963|PMID:11118137	GO:0009735	response to cytokinin stimulus	Publication:501717764|PMID:16212609	GNL	1304	2693	3636	3164.5	1537	1206	1371.5	8936	9523	9229.5	1019	1246	1132.5	781	1044	912.5	295	344	319.5	1268	1054	1161	1028	782	905	3504	4243	3873.5
ATAF2	AT5G08790	AT5G08790	26	185	1	AT5G08790	1	protein_coding	ATAF2; transcription activator	induced by wounding, belongs to a large family of putative transcriptional activators with NAC domain.	ATAF2; FUNCTIONS IN: transcription activator activity; INVOLVED IN: in 8 processes; LOCATED IN: nucleus; EXPRESSED IN: primary root, lateral root, root cap of the lateral root, cotyledon, adult leaf; CONTAINS InterPro DOMAIN/s: No apical meristem (NAM) protein (InterPro:IPR003441); BEST Arabidopsis thaliana protein match is: ANAC102 (ARABIDOPSIS NAC DOMAIN CONTAINING PROTEIN 102); transcription f…	GO:0005634	nucleus	Publication:501683531|PMID:12646039	GO:0016563	transcription activator activity	Publication:501680151|PMID:11516145	GO:0007275 | GO:0008361 | GO:0009416 | GO:0009611 | GO:0009611 | GO:0009620 | GO:0009744 | GO:0009751 | GO:0009753	multicellular organismal development | regulation of cell size | response to light stimulus | response to wounding | response to wounding | response to fungus | response to sucrose stimulus | response to salicylic acid stimulus | response to jasmonic acid stimulus	Communication:501714663 | Publication:501717608|PMID:16115070 | Publication:501717608|PMID:16115070 | Publication:501680151|PMID:11516145 | Publication:501717608|PMID:16115070 | Publication:501717608|PMID:16115070 | Publication:501717608|PMID:16115070 | Publication:501717608|PMID:16115070 | Publication:501717608|PMID:16115070	ATAF2	1234	325	468	396.5	460	411	435.5	1228	1265	1246.5	466	555	510.5	481	544	512.5	448	584	516	406	463	434.5	555	471	513	537	638	587.5
HB5	AT5G65310	AT5G65310	26	393	3	NA	NA	protein_coding	ATHB5 (ARABIDOPSIS THALIANA HOMEOBOX PROTEIN 5); protein homodimerization/ sequence-specific DNA binding / transcription activator/ transcription factor	Encodes a class I HDZip (homeodomain-leucine zipper) protein that is a positive regulator of ABA-responsiveness, mediating the inhibitory effect of ABA on growth during seedling establishment.	ARABIDOPSIS THALIANA HOMEOBOX PROTEIN 5 (ATHB5); FUNCTIONS IN: transcription factor activity, sequence-specific DNA binding, protein homodimerization activity, transcription activator activity; INVOLVED IN: positive regulation of transcription, abscisic acid mediated signaling, regulation of abscisic acid mediated signaling, response to abscisic acid stimulus, regulation of transcription, DNA-dep…	GO:0005634 | GO:0005634	nucleus | nucleus	AnalysisReference:501730468 | Communication:501714663	GO:0003700 | GO:0003700 | GO:0003700 | GO:0016563 | GO:0042803 | GO:0043565	transcription factor activity | transcription factor activity | transcription factor activity | transcription activator activity | protein homodimerization activity | sequence-specific DNA binding	Publication:501705889|PMID:12678559 | Publication:1345963|PMID:11118137 | Publication:4723|PMID:7948864 | Publication:501717432|PMID:16055682 | Publication:501680370|PMID:11247607 | Publication:501680370|PMID:11247607	GO:0006355 | GO:0009737 | GO:0009737 | GO:0009738 | GO:0009787 | GO:0045941	regulation of transcription, DNA-dependent | response to abscisic acid stimulus | response to abscisic acid stimulus | abscisic acid mediated signaling | regulation of abscisic acid mediated signaling | positive regulation of transcription	Communication:501714663 | Publication:501705889|PMID:12678559 | Publication:501705889|PMID:12678559 | Publication:501705889|PMID:12678559 | Publication:1546898 | Publication:501717432|PMID:16055682	HB5	1924	259	325	292	396	354	375	719	713	716	420	517	468.5	801	833	817	1307	1719	1513	379	411	395	747	631	689	451	436	443.5
AT1G51140	AT1G51140	AT1G51140	25	253	2	NA	NA	protein_coding	basic helix-loop-helix (bHLH) family protein	---	basic helix-loop-helix (bHLH) family protein; FUNCTIONS IN: transcription factor activity, DNA binding; INVOLVED IN: regulation of transcription; LOCATED IN: nucleus; EXPRESSED IN: 22 plant structures; EXPRESSED DURING: 13 growth stages; CONTAINS InterPro DOMAIN/s: Basic helix-loop-helix dimerisation region bHLH (InterPro:IPR001092), Helix-loop-helix DNA-binding (InterPro:IPR011598); BEST Arabido…	GO:0005634	nucleus	AnalysisReference:501730468	GO:0003677 | GO:0003700 | GO:0003700	DNA binding | transcription factor activity | transcription factor activity	Communication:501714663 | Publication:1345963|PMID:11118137 | Publication:501705886|PMID:12679534	GO:0045449	regulation of transcription	Publication:1345963|PMID:11118137	AT1G51140	1625	182	253	217.5	610	581	595.5	171	154	162.5	276	384	330	341	458	399.5	149	194	171.5	433	527	480	469	401	435	252	311	281.5
AT1G59860	AT1G59860	AT1G59860	25	40	1	AT1G59860	1	protein_coding	17.6 kDa class I heat shock protein (HSP17.6A-CI)	---	17.6 kDa class I heat shock protein (HSP17.6A-CI); INVOLVED IN: response to heat; EXPRESSED IN: male gametophyte, pollen tube; EXPRESSED DURING: M germinated pollen stage; CONTAINS InterPro DOMAIN/s: Heat shock protein Hsp20 (InterPro:IPR002068), HSP20-like chaperone (InterPro:IPR008978); BEST Arabidopsis thaliana protein match is: 17.8 kDa class I heat shock protein (HSP17.8-CI) (TAIR:AT1G07400.…	---	---	---	---	---	---	GO:0009408	response to heat	Communication:501714663	AT1G59860	720	153	257	205	93	97	95	28	25	26.5	22	39	30.5	26	41	33.5	12	35	23.5	240	98	169	45	53	49	83	96	89.5
TIFY7	AT1G70700	AT1G70700	25	263	2	NA	NA	protein_coding	TIFY7	JAZ9 is a protein presumed to be involved in jasmonate signaling. JAZ9 transcript levels rise in response to a jasmonate stimulus. JAZ9 can interact with the COI1 F-box subunit of an SCF E3 ubiquitin ligase in a yeast-two-hybrid assay only in the presence of jasmonate-isoleucine (JA-ILE) or coronatine. The Jas domain appears to be important for JAZ9-COI1 interactions in the presence of coronatine…	TIFY7; FUNCTIONS IN: molecular_function unknown; INVOLVED IN: response to jasmonic acid stimulus; LOCATED IN: cellular_component unknown; EXPRESSED IN: 21 plant structures; EXPRESSED DURING: 13 growth stages; CONTAINS InterPro DOMAIN/s: Tify (InterPro:IPR010399), CCT domain-like (InterPro:IPR018467); BEST Arabidopsis thaliana protein match is: JAZ4 (JASMONATE-ZIM-DOMAIN PROTEIN 4) (TAIR:AT1G48500…	GO:0005575	cellular_component	Communication:1345790	GO:0003674	molecular_function	Communication:1345790	GO:0009753	response to jasmonic acid stimulus	Publication:501722828|PMID:17637677	TIFY7	1247	2704	2995	2849.5	2910	2715	2812.5	1951	1822	1886.5	1803	2418	2110.5	1889	2453	2171	991	1343	1167	3069	3368	3218.5	2184	1771	1977.5	2807	3242	3024.5
GATA8	AT3G54810	AT3G54810	25	320	2	NA	NA	protein_coding	zinc finger (GATA type) family protein	Encodes a protein containing a GATA type zinc finger domain that is expressed in the embryo axis and involved in germination. Mutants have a reduced rate of germination even when stratified.	BLUE MICROPYLAR END 3 (BME3); FUNCTIONS IN: transcription factor activity; INVOLVED IN: seed germination; LOCATED IN: nucleus; EXPRESSED IN: 22 plant structures; EXPRESSED DURING: 13 growth stages; CONTAINS InterPro DOMAIN/s: Zinc finger, NHR/GATA-type (InterPro:IPR013088), Transcription factor, GATA, plant (InterPro:IPR016679), Zinc finger, GATA-type (InterPro:IPR000679); BEST Arabidopsis thalia…	GO:0005634	nucleus	AnalysisReference:501730468	GO:0003700 | GO:0003700	transcription factor activity | transcription factor activity	Communication:501714663 | Publication:1345963|PMID:11118137	GO:0009845	seed germination	Publication:501718230|PMID:16359389	GATA8	1869	433	572	502.5	1176	1037	1106.5	1707	1957	1832	588	799	693.5	579	759	669	633	878	755.5	1381	1666	1523.5	826	703	764.5	682	743	712.5
GATA4	AT3G60530	AT3G60530	25	148	4	AT3G60530	4	protein_coding	zinc finger (GATA type) family protein	---	zinc finger (GATA type) family protein; FUNCTIONS IN: transcription factor activity; INVOLVED IN: regulation of transcription, DNA-dependent; LOCATED IN: nucleus; EXPRESSED IN: 19 plant structures; EXPRESSED DURING: 13 growth stages; CONTAINS InterPro DOMAIN/s: Zinc finger, NHR/GATA-type (InterPro:IPR013088), Transcription factor, GATA, plant (InterPro:IPR016679), Zinc finger, GATA-type (InterPro…	GO:0005634	nucleus	AnalysisReference:501730468	GO:0003700 | GO:0003700	transcription factor activity | transcription factor activity	Communication:501714663 | Publication:1345963|PMID:11118137	GO:0006355	regulation of transcription, DNA-dependent	AnalysisReference:501730468	GATA4	1096	129	170	149.5	177	136	156.5	385	380	382.5	183	204	193.5	230	308	269	393	515	454	132	131	131.5	240	216	228	158	177	167.5
Hop3	AT4G12400	AT4G12400	25	1907	1	NA	NA	protein_coding	stress-inducible protein, putative	---	stress-inducible protein, putative; FUNCTIONS IN: binding; INVOLVED IN: response to high light intensity, response to hydrogen peroxide, response to heat, response to stress; LOCATED IN: cellular_component unknown; EXPRESSED IN: 18 plant structures; EXPRESSED DURING: 7 growth stages; CONTAINS InterPro DOMAIN/s: Heat shock chaperonin-binding (InterPro:IPR006636), Tetratricopeptide TPR-1 (InterPro:…	GO:0005575	cellular_component	Communication:1345790	GO:0005488	binding	AnalysisReference:501730468	GO:0006950 | GO:0009408 | GO:0009644 | GO:0042542	response to stress | response to heat | response to high light intensity | response to hydrogen peroxide	Communication:501714663 | Publication:501720058|PMID:17059409 | Publication:501720058|PMID:17059409 | Publication:501720058|PMID:17059409	Hop3	2082	1192	1762	1477	1140	961	1050.5	369	341	355	264	379	321.5	221	256	238.5	125	186	155.5	2348	1303	1825.5	691	611	651	1002	1031	1016.5
ATG8F	AT4G16520	AT4G16520	25	1931	1	NA	NA	protein_coding	ATG8F (autophagy 8f); microtubule binding	---	autophagy 8f (ATG8F); FUNCTIONS IN: microtubule binding; INVOLVED IN: autophagy; EXPRESSED IN: 23 plant structures; EXPRESSED DURING: 13 growth stages; CONTAINS InterPro DOMAIN/s: Light chain 3 (LC3) (InterPro:IPR004241); BEST Arabidopsis thaliana protein match is: AtATG8e; microtubule binding (TAIR:AT2G45170.2); Has 1164 Blast hits to 1162 proteins in 201 species: Archae - 0; Bacteria - 0; Metaz…	---	---	---	GO:0008017	microtubule binding	Communication:501714663	GO:0006914	autophagy	Communication:501714663	ATG8F	934	288	355	321.5	472	322	397	1154	1014	1084	544	684	614	862	828	845	936	1041	988.5	277	375	326	445	552	498.5	368	439	403.5
TMO3	AT4G23750	AT4G23750	25	340	1	NA	NA	protein_coding	CRF2 (CYTOKININ RESPONSE FACTOR 2); DNA binding / transcription factor	encodes a member of the ERF (ethylene response factor) subfamily B-5 of ERF/AP2 transcription factor family. The protein contains one AP2 domain. There are 7 members in this subfamily.	CYTOKININ RESPONSE FACTOR 2 (CRF2); FUNCTIONS IN: transcription factor activity, DNA binding; INVOLVED IN: cotyledon development, regulation of transcription, DNA-dependent, transcription factor import into nucleus; LOCATED IN: nucleus; EXPRESSED IN: 15 plant structures; EXPRESSED DURING: 7 growth stages; CONTAINS InterPro DOMAIN/s: DNA-binding, integrase-type (InterPro:IPR016177), Pathogenesis-r…	GO:0005634	nucleus	Communication:501714663	GO:0003677 | GO:0003700 | GO:0003700	DNA binding | transcription factor activity | transcription factor activity	Communication:501714663 | Communication:501714663 | Publication:1345963|PMID:11118137	GO:0006355 | GO:0042991 | GO:0048825	regulation of transcription, DNA-dependent | transcription factor import into nucleus | cotyledon development	Communication:501714663 | Publication:501719226|PMID:16832061 | Publication:501719226|PMID:16832061	TMO3	1831	449	570	509.5	454	392	423	2263	2746	2504.5	338	430	384	300	377	338.5	413	590	501.5	584	532	558	257	231	244	666	797	731.5
DEAR2	AT5G67190	AT5G67190	25	396	1	NA	NA	protein_coding	AP2 domain-containing transcription factor, putative	encodes a member of the DREB subfamily A-5 of ERF/AP2 transcription factor family. The protein contains one AP2 domain. There are 16 members in this subfamily including RAP2.1, RAP2.9 and RAP2.10.	AP2 domain-containing transcription factor, putative; FUNCTIONS IN: transcription factor activity, DNA binding; INVOLVED IN: regulation of transcription, DNA-dependent; LOCATED IN: nucleus; EXPRESSED IN: male gametophyte, sepal, carpel; EXPRESSED DURING: 4 anthesis; CONTAINS InterPro DOMAIN/s: DNA-binding, integrase-type (InterPro:IPR016177), Pathogenesis-related transcriptional factor and ERF, D…	GO:0005634	nucleus	Communication:501714663	GO:0003677 | GO:0003700 | GO:0003700	DNA binding | transcription factor activity | transcription factor activity	Communication:501714663 | Communication:501714663 | Publication:1345963|PMID:11118137	GO:0006355 | GO:0006355	regulation of transcription, DNA-dependent | "regulation of transcription, DNA-dependent"	Communication:501714663 | AnalysisReference:501730468	DEAR2	555	403	412	407.5	257	246	251.5	74	60	67	187	244	215.5	200	311	255.5	165	229	197	369	365	367	251	209	230	328	408	368
MYBR1	AT5G67300	AT5G67300	25	397	1	NA	NA	protein_coding	MYBR1 (MYB DOMAIN PROTEIN R1); DNA binding / transcription factor	Member of the R2R3 factor MYB gene family involved in mediating plant responses to a variety of abiotic stimiuli.	MYB DOMAIN PROTEIN R1 (MYBR1); FUNCTIONS IN: transcription factor activity, DNA binding; INVOLVED IN: in 12 processes; LOCATED IN: nucleus; EXPRESSED IN: 24 plant structures; EXPRESSED DURING: 13 growth stages; CONTAINS InterPro DOMAIN/s: SANT, DNA-binding (InterPro:IPR001005), Homeodomain-like (InterPro:IPR009057), Myb, DNA-binding (InterPro:IPR014778), Myb-type HTH DNA-binding domain (InterPro:…	GO:0005634	nucleus	Publication:501723687|PMID:18162593	GO:0003677 | GO:0003700	DNA binding | transcription factor activity	Communication:501714663 | Publication:1345963|PMID:11118137	GO:0006355 | GO:0006950 | GO:0009414 | GO:0009651 | GO:0009723 | GO:0009733 | GO:0009737 | GO:0009737 | GO:0009739 | GO:0009751 | GO:0009753 | GO:0010200 | GO:0046686	regulation of transcription, DNA-dependent | response to stress | response to water deprivation | response to salt stress | response to ethylene stimulus | response to auxin stimulus | response to abscisic acid stimulus | response to abscisic acid stimulus | response to gibberellin stimulus | response to salicylic acid stimulus | response to jasmonic acid stimulus | response to chitin | response …	Communication:501714663 | Publication:501723687|PMID:18162593 | Publication:501725136|PMID:18552355 | Publication:501718564|PMID:16463103 | Publication:501718564|PMID:16463103 | Publication:501718564|PMID:16463103 | Publication:501723687|PMID:18162593 | Publication:501718564|PMID:16463103 | Publication:501718564|PMID:16463103 | Publication:501718564|PMID:16463103 | Publication:501718564|PMID:1646…	MYBR1	1985	642	970	806	1371	1126	1248.5	3725	3845	3785	832	1226	1029	994	1296	1145	971	1282	1126.5	1044	1273	1158.5	1084	877	980.5	1068	1146	1107
AT1G04880	AT1G04880	AT1G04880	24	234	1	NA	NA	protein_coding	high mobility group (HMG1/2) family protein / ARID/BRIGHT DNA-binding domain-containing protein	---	high mobility group (HMG1/2) family protein / ARID/BRIGHT DNA-binding domain-containing protein; FUNCTIONS IN: transcription factor activity; INVOLVED IN: regulation of transcription; LOCATED IN: intracellular, nucleus; EXPRESSED IN: 9 plant structures; EXPRESSED DURING: 7 growth stages; CONTAINS InterPro DOMAIN/s: High mobility group, superfamily (InterPro:IPR009071), High mobility group, HMG1/H…	GO:0005622 | GO:0005634	intracellular | nucleus	AnalysisReference:501730468 | AnalysisReference:501730468	GO:0003700	transcription factor activity	Publication:1345963|PMID:11118137	GO:0045449	regulation of transcription	Publication:1345963|PMID:11118137	AT1G04880	1587	157	175	166	299	270	284.5	92	87	89.5	179	225	202	141	171	156	30	45	37.5	306	252	279	212	165	188.5	208	263	235.5
RAP2.4	AT1G22190	AT1G22190	24	246	1	NA	NA	protein_coding	AP2 domain-containing transcription factor, putative	---	AP2 domain-containing transcription factor, putative; FUNCTIONS IN: transcription factor activity, DNA binding; INVOLVED IN: regulation of transcription, DNA-dependent; LOCATED IN: nucleus; EXPRESSED IN: 22 plant structures; EXPRESSED DURING: 13 growth stages; CONTAINS InterPro DOMAIN/s: DNA-binding, integrase-type (InterPro:IPR016177), Pathogenesis-related transcriptional factor and ERF, DNA-bin…	GO:0005634	nucleus	Publication:3195|PMID:9192694	GO:0003677 | GO:0003700 | GO:0003700	DNA binding | transcription factor activity | transcription factor activity	Publication:3195|PMID:9192694 | Publication:3195|PMID:9192694 | Publication:1345963|PMID:11118137	GO:0006355 | GO:0006355	regulation of transcription, DNA-dependent | "regulation of transcription, DNA-dependent"	Communication:501714663 | AnalysisReference:501730468	RAP2.4	1507	467	572	519.5	863	743	803	1682	2303	1992.5	629	868	748.5	520	765	642.5	401	526	463.5	879	1017	948	867	635	751	753	727	740
AT2G18300	AT2G18300	AT2G18300	24	275	1	NA	NA	protein_coding	basic helix-loop-helix (bHLH) family protein	---	basic helix-loop-helix (bHLH) family protein; FUNCTIONS IN: transcription factor activity; INVOLVED IN: response to cytokinin stimulus, regulation of transcription; LOCATED IN: nucleus; EXPRESSED IN: 13 plant structures; EXPRESSED DURING: 8 growth stages; CONTAINS InterPro DOMAIN/s: Basic helix-loop-helix dimerisation region bHLH (InterPro:IPR001092), Helix-loop-helix DNA-binding (InterPro:IPR011…	GO:0005634	nucleus	AnalysisReference:501730468	GO:0003700 | GO:0003700	transcription factor activity | transcription factor activity	Publication:1345963|PMID:11118137 | Publication:501705886|PMID:12679534	GO:0009735 | GO:0045449	response to cytokinin stimulus | regulation of transcription	Publication:501717764|PMID:16212609 | Publication:1345963|PMID:11118137	AT2G18300	1861	1125	1008	1066.5	2012	1695	1853.5	1519	1340	1429.5	1897	2674	2285.5	2638	3242	2940	3096	4469	3782.5	2689	2735	2712	2056	1731	1893.5	1137	1514	1325.5
ARF10	AT2G28350	AT2G28350	24	286	1	NA	NA	protein_coding	ARF10 (AUXIN RESPONSE FACTOR 10); miRNA binding / transcription factor	Involved in root cap cell differentiation.	AUXIN RESPONSE FACTOR 10 (ARF10); FUNCTIONS IN: transcription factor activity, miRNA binding; INVOLVED IN: in 13 processes; LOCATED IN: nucleus; EXPRESSED IN: 25 plant structures; EXPRESSED DURING: 15 growth stages; CONTAINS InterPro DOMAIN/s: Aux/IAA-ARF-dimerisation (InterPro:IPR011525), Transcriptional factor B3 (InterPro:IPR003340), Auxin response factor (InterPro:IPR010525); BEST Arabidopsis…	GO:0005634	nucleus	AnalysisReference:501730468	GO:0003700 | GO:0035198 | GO:0035198	transcription factor activity | miRNA binding | miRNA binding	Publication:1345963|PMID:11118137 | Publication:501715170|PMID:15829600 | Publication:501715170|PMID:15829600	GO:0006355 | GO:0007389 | GO:0009734 | GO:0009738 | GO:0009743 | GO:0010154 | GO:0031540 | GO:0048366 | GO:0048441 | GO:0048442 | GO:0048589 | GO:0048829 | GO:0048829 | GO:0051301	regulation of transcription, DNA-dependent | pattern specification process | auxin mediated signaling pathway | abscisic acid mediated signaling | response to carbohydrate stimulus | fruit development | regulation of anthocyanin biosynthetic process | leaf development | petal development | sepal development | developmental growth | root cap development | root cap development | cell division	Communication:501714663 | Publication:501717443|PMID:16006581 | Publication:501723012|PMID:17672844 | Publication:501723012|PMID:17672844 | Publication:501723012|PMID:17672844 | Publication:501723012|PMID:17672844 | Publication:501723012|PMID:17672844 | Publication:501723012|PMID:17672844 | Publication:501723012|PMID:17672844 | Publication:501723012|PMID:17672844 | Publication:501723012|PMID:1767…	ARF10	2265	811	1009	910	1716	1370	1543	1338	1287	1312.5	1045	1233	1139	995	1197	1096	639	737	688	2234	2493	2363.5	1565	1246	1405.5	1033	1132	1082.5
ETC2	AT2G30420	AT2G30420	24	287	1	NA	NA	protein_coding	ETC2; DNA binding / transcription factor	In a tandem repeat with AT2G30424 and AT2G30432	ETC2; FUNCTIONS IN: transcription factor activity, DNA binding; INVOLVED IN: regulation of transcription; LOCATED IN: mitochondrion; CONTAINS InterPro DOMAIN/s: SANT, DNA-binding (InterPro:IPR001005), Myb, DNA-binding (InterPro:IPR014778), Homeodomain-related (InterPro:IPR012287), Myb transcription factor (InterPro:IPR015495); BEST Arabidopsis thaliana protein match is: TCL2 (TRICHOMELESS 2); DNA…	GO:0005739	mitochondrion	AnalysisReference:501730133	GO:0003677 | GO:0003700	DNA binding | transcription factor activity	Communication:501714663 | Publication:1345963|PMID:11118137	GO:0045449	regulation of transcription	Publication:1345963|PMID:11118137	ETC2	696	54	44	49	89	53	71	30	27	28.5	83	122	102.5	114	121	117.5	108	155	131.5	101	112	106.5	94	73	83.5	45	65	55
PFG2	AT3G62610	AT3G62610	24	330	1	NA	NA	protein_coding	ATMYB11 (MYB DOMAIN PROTEIN 11); DNA binding / transcription factor	Member of the R2R3 factor gene family.	MYB DOMAIN PROTEIN 11 (ATMYB11); FUNCTIONS IN: transcription factor activity, DNA binding; INVOLVED IN: flavonol biosynthetic process, regulation of transcription, DNA-dependent; EXPRESSED IN: 9 plant structures; EXPRESSED DURING: 6 growth stages; CONTAINS InterPro DOMAIN/s: SANT, DNA-binding (InterPro:IPR001005), Homeodomain-like (InterPro:IPR009057), Myb, DNA-binding (InterPro:IPR014778), Myb-t…	---	---	---	GO:0003677 | GO:0003700	DNA binding | transcription factor activity	Communication:501714663 | Publication:1345963|PMID:11118137	GO:0006355 | GO:0051555	regulation of transcription, DNA-dependent | flavonol biosynthetic process	Publication:1979|PMID:9839469 | Publication:501721436|PMID:17419845	PFG2	1246	42	76	59	31	41	36	55	48	51.5	21	22	21.5	11	12	11.5	5	4	4.5	30	42	36	24	20	22	51	49	50
OZF2	AT4G29190	AT4G29190	24	345	3	NA	NA	protein_coding	zinc finger (CCCH-type) family protein	---	zinc finger (CCCH-type) family protein; FUNCTIONS IN: transcription factor activity; INVOLVED IN: regulation of transcription; LOCATED IN: cellular_component unknown; EXPRESSED IN: 23 plant structures; EXPRESSED DURING: 13 growth stages; CONTAINS InterPro DOMAIN/s: Zinc finger, CCCH-type (InterPro:IPR000571); BEST Arabidopsis thaliana protein match is: zinc finger (CCCH-type) family protein (TAIR…	GO:0005575	cellular_component	Communication:1345790	GO:0003700	transcription factor activity	Publication:1345963|PMID:11118137	GO:0045449	regulation of transcription	Publication:1345963|PMID:11118137	OZF2	1436	55	55	55	69	64	66.5	96	106	101	76	76	76	141	191	166	325	543	434	72	62	67	105	85	95	66	103	84.5
SIGD	AT5G13730	AT5G13730	24	188	1	AT5G13730	1	protein_coding	SIG4 (SIGMA FACTOR 4); DNA binding / DNA-directed RNA polymerase/ sigma factor/ transcription factor	Encodes sigma 4 factor, involved in regulating the activity of the plastid-encoded RNA polymerase PEP. Regulates the overall quantity of NDH complexes and thus influences NDH activity.	SIGMA FACTOR 4 (SIG4); FUNCTIONS IN: DNA-directed RNA polymerase activity, transcription factor activity, sigma factor activity, DNA binding; INVOLVED IN: regulation of transcription, DNA-dependent, transcription initiation; LOCATED IN: chloroplast; EXPRESSED IN: 20 plant structures; EXPRESSED DURING: 13 growth stages; CONTAINS InterPro DOMAIN/s: RNA polymerase sigma factor, region 2 (InterPro:IP…	GO:0009507	chloroplast	AnalysisReference:501730133	GO:0003677 | GO:0003700 | GO:0003899 | GO:0016987	DNA binding | transcription factor activity | DNA-directed RNA polymerase activity | sigma factor activity	Communication:501714663 | Communication:501714663 | Communication:501714663 | Publication:37|PMID:10984613	GO:0006352 | GO:0006355	transcription initiation | "regulation of transcription, DNA-dependent"	Publication:37|PMID:10984613 | Communication:501714663	SIGD	1375	795	896	845.5	1031	833	932	681	572	626.5	920	1214	1067	1203	1471	1337	1288	1626	1457	950	1190	1070	927	778	852.5	924	1040	982
PFA-DSP5	AT5G16480	AT5G16480	24	2101	1	NA	NA	protein_coding	tyrosine specific protein phosphatase family protein	---	tyrosine specific protein phosphatase family protein; FUNCTIONS IN: phosphatase activity, protein tyrosine phosphatase activity, phosphoprotein phosphatase activity; INVOLVED IN: dephosphorylation; LOCATED IN: cellular_component unknown; EXPRESSED IN: 24 plant structures; EXPRESSED DURING: 15 growth stages; CONTAINS InterPro DOMAIN/s: Protein-tyrosine phosphatase, active site (InterPro:IPR016130)…	GO:0005575	cellular_component	Communication:1345790	GO:0004721 | GO:0004725 | GO:0016791	phosphoprotein phosphatase activity | protein tyrosine phosphatase activity | phosphatase activity	Communication:501714663 | AnalysisReference:501730468 | AnalysisReference:501730468	GO:0016311	dephosphorylation	AnalysisReference:501730468	PFA-DSP5	1115	129	157	143	174	126	150	357	321	339	150	163	156.5	145	164	154.5	161	214	187.5	156	133	144.5	128	116	122	140	140	140
CYP707A3	AT5G45340	AT5G45340	24	201	1	AT5G45340	1	protein_coding	CYP707A3; (+)-abscisic acid 8'-hydroxylase/ oxygen binding	Encodes a protein with ABA 8'-hydroxylase activity; involved in ABA catabolism. Mutant analyses show that disruption in the gene results in more drought tolerance whereas overexpression results in increased transpiration rate and reduced drought tolerance. Gene involved in postgermination growth. Plant P450 CYP707A3, ABA 8'-hydroxylase, binds enantioselectively (+)-ABA but not (-)-ABA, whereas th…	CYP707A3; FUNCTIONS IN: oxygen binding, (+)-abscisic acid 8'-hydroxylase activity; INVOLVED IN: in 8 processes; LOCATED IN: endomembrane system; EXPRESSED IN: 25 plant structures; EXPRESSED DURING: 12 growth stages; CONTAINS InterPro DOMAIN/s: Cytochrome P450 (InterPro:IPR001128), Cytochrome P450, C-terminal region (InterPro:IPR017973), Cytochrome P450, E-class, group I (InterPro:IPR002401), Cyto…	GO:0012505	endomembrane system	AnalysisReference:501730133	GO:0010295 | GO:0019825	(+)-abscisic acid 8'-hydroxylase activity | oxygen binding	Publication:501712328|PMID:15064374 | Communication:501714663	GO:0009414 | GO:0009414 | GO:0009639 | GO:0046345	response to water deprivation | response to water deprivation | response to red or far red light | abscisic acid catabolic process	Publication:501718896|PMID:16623881 | Publication:501718896|PMID:16623881 | Publication:501720219|PMID:17010113 | Publication:501718896|PMID:16623881	CYP707A3	1902	34	20	27	152	220	186	289	406	347.5	90	144	117	91	139	115	173	245	209	78	83	80.5	108	82	95	77	60	68.5
CP12	AT5G49480	AT5G49480	24	204	1	AT5G49480	1	protein_coding	ATCP1 (Ca2+-binding protein 1); calcium ion binding	AtCP1 encodes a novel Ca2+-binding protein, which shares sequence similarities with calmodulins. The expression of AtCP1 is induced by NaCl.	Ca2+-binding protein 1 (ATCP1); FUNCTIONS IN: calcium ion binding; INVOLVED IN: hyperosmotic salinity response; LOCATED IN: cytosol; EXPRESSED IN: 25 plant structures; EXPRESSED DURING: 14 growth stages; CONTAINS InterPro DOMAIN/s: EF-HAND 1 (InterPro:IPR018247), EF-HAND 2 (InterPro:IPR018249), EF-Hand type (InterPro:IPR011992), Calcium-binding EF-hand (InterPro:IPR002048), EF hand (InterPro:IPR0…	GO:0005829	cytosol	Publication:2348|PMID:9678579	GO:0005509 | GO:0005509	calcium ion binding | calcium ion binding	Publication:2348|PMID:9678579 | Communication:501714663	GO:0042538	hyperosmotic salinity response	Publication:2348|PMID:9678579	CP12	896	6572	8210	7391	5053	4700	4876.5	10166	9837	10001.5	4291	4597	4444	3942	5169	4555.5	1890	2685	2287.5	6244	7076	6660	4533	3582	4057.5	8151	10325	9238
NF-YC4	AT5G63470	AT5G63470	24	391	1	NA	NA	protein_coding	NF-YC4 (NUCLEAR FACTOR Y, SUBUNIT C4); DNA binding / transcription factor	---	NUCLEAR FACTOR Y, SUBUNIT C4 (NF-YC4); FUNCTIONS IN: transcription factor activity, DNA binding; INVOLVED IN: regulation of transcription, DNA-dependent; LOCATED IN: nucleus; EXPRESSED IN: male gametophyte, pollen tube; EXPRESSED DURING: L mature pollen stage, M germinated pollen stage; CONTAINS InterPro DOMAIN/s: Transcription factor CBF/NF-Y/archaeal histone (InterPro:IPR003958), Histone-fold (…	GO:0005634	nucleus	Publication:501683106|PMID:10446203	GO:0003677 | GO:0003700	DNA binding | transcription factor activity	Publication:501683106|PMID:10446203 | Publication:1345963|PMID:11118137	GO:0006355	regulation of transcription, DNA-dependent	Publication:501683106|PMID:10446203	NF-YC4	1390	231	335	283	329	246	287.5	658	627	642.5	332	474	403	578	694	636	906	1323	1114.5	258	358	308	379	340	359.5	238	304	271
GSTU17	AT1G10370	AT1G10370	23	10	1	AT1G10370	1	protein_coding	ERD9 (EARLY-RESPONSIVE TO DEHYDRATION 9); glutathione transferase	---	EARLY-RESPONSIVE TO DEHYDRATION 9 (ERD9); FUNCTIONS IN: glutathione transferase activity; INVOLVED IN: response to water deprivation, toxin catabolic process; LOCATED IN: chloroplast, cytoplasm; EXPRESSED IN: 21 plant structures; EXPRESSED DURING: 14 growth stages; CONTAINS InterPro DOMAIN/s: Thioredoxin fold (InterPro:IPR012335), Glutathione S-transferase, C-terminal (InterPro:IPR004046), Glutat…	GO:0005737 | GO:0009507	cytoplasm | chloroplast	Publication:501681713|PMID:12090627 | Publication:501724486|PMID:18431481	GO:0004364	glutathione transferase activity	Communication:501714663	GO:0009407	toxin catabolic process	Publication:501681713|PMID:12090627	GSTU17	962	5834	7212	6523	11021	10091	10556	2804	3098	2951	5713	8297	7005	5212	6023	5617.5	1352	1731	1541.5	7610	9606	8608	9459	8532	8995.5	5933	6906	6419.5
AT1G79700	AT1G79700	AT1G79700	23	270	5	NA	NA	protein_coding	ovule development protein, putative	---	ovule development protein, putative; FUNCTIONS IN: transcription factor activity, DNA binding; INVOLVED IN: organ morphogenesis, regulation of transcription, DNA-dependent; LOCATED IN: nucleus; EXPRESSED IN: 18 plant structures; EXPRESSED DURING: 11 growth stages; CONTAINS InterPro DOMAIN/s: DNA-binding, integrase-type (InterPro:IPR016177), Pathogenesis-related transcriptional factor and ERF, DNA…	GO:0005634	nucleus	Publication:101|PMID:10948255	GO:0003677 | GO:0003700 | GO:0003700	DNA binding | transcription factor activity | transcription factor activity	Publication:4031|PMID:8742707 | Publication:101|PMID:10948255 | Publication:1345963|PMID:11118137	GO:0006355 | GO:0009887	regulation of transcription, DNA-dependent | organ morphogenesis	Communication:501714663 | Publication:4031|PMID:8742707	AT1G79700	1112	25	34	29.5	53	49	51	249	197	223	65	104	84.5	120	107	113.5	138	189	163.5	53	62	57.5	120	116	118	38	41	39.5
AT2G19310	AT2G19310	AT2G19310	23	84	1	AT2G19310	1	protein_coding	---	---	FUNCTIONS IN: molecular_function unknown; INVOLVED IN: response to oxidative stress, response to high light intensity, response to hydrogen peroxide, response to heat; EXPRESSED IN: 22 plant structures; EXPRESSED DURING: 11 growth stages; CONTAINS InterPro DOMAIN/s: HSP20-like chaperone (InterPro:IPR008978); BEST Arabidopsis thaliana protein match is: HSP18.2 (heat shock protein 18.2) (TAIR:AT5G5…	---	---	---	GO:0003674	molecular_function	Communication:501683652	GO:0006979 | GO:0009408 | GO:0009644 | GO:0042542	response to oxidative stress | response to heat | response to high light intensity | response to hydrogen peroxide	Publication:501727372|PMID:18614705 | Publication:501720058|PMID:17059409 | Publication:501720058|PMID:17059409 | Publication:501720058|PMID:17059409	AT2G19310	613	1581	1854	1717.5	1173	1022	1097.5	978	776	877	487	742	614.5	656	778	717	439	585	512	1999	1578	1788.5	1016	984	1000	1491	1702	1596.5
DEAR3	AT2G23340	AT2G23340	23	282	1	NA	NA	protein_coding	AP2 domain-containing transcription factor, putative	encodes a member of the DREB subfamily A-5 of ERF/AP2 transcription factor family. The protein contains one AP2 domain. There are 16 members in this subfamily including RAP2.1, RAP2.9 and RAP2.10.	AP2 domain-containing transcription factor, putative; FUNCTIONS IN: transcription factor activity, DNA binding; INVOLVED IN: regulation of transcription, DNA-dependent; LOCATED IN: nucleus; EXPRESSED IN: 24 plant structures; EXPRESSED DURING: 15 growth stages; CONTAINS InterPro DOMAIN/s: DNA-binding, integrase-type (InterPro:IPR016177), Pathogenesis-related transcriptional factor and ERF, DNA-bin…	GO:0005634	nucleus	Communication:501714663	GO:0003677 | GO:0003700 | GO:0003700	DNA binding | transcription factor activity | transcription factor activity	Communication:501714663 | Communication:501714663 | Publication:1345963|PMID:11118137	GO:0006355 | GO:0006355	regulation of transcription, DNA-dependent | "regulation of transcription, DNA-dependent"	Communication:501714663 | AnalysisReference:501730468	DEAR3	878	176	223	199.5	99	117	108	132	96	114	97	105	101	110	140	125	114	163	138.5	146	151	148.5	96	68	82	190	229	209.5
WRKY33	AT2G38470	AT2G38470	23	291	1	NA	NA	protein_coding	WRKY33; transcription factor	Member of the plant WRKY transcription factor family. Regulates the antagonistic relationship between defense pathways mediating responses to P. syringae and necrotrophic fungal pathogens. Located in nucleus. Involved in response to various abiotic stresses - especially salt stress.	WRKY33; FUNCTIONS IN: transcription factor activity; INVOLVED IN: in 10 processes; LOCATED IN: nucleus; EXPRESSED IN: 22 plant structures; EXPRESSED DURING: 13 growth stages; CONTAINS InterPro DOMAIN/s: DNA-binding WRKY (InterPro:IPR003657); BEST Arabidopsis thaliana protein match is: WRKY4; DNA binding / transcription factor (TAIR:AT1G13960.2); Has 5341 Blast hits to 3123 proteins in 217 species…	GO:0005634 | GO:0005634	nucleus | nucleus	Publication:501720061|PMID:17059405 | Publication:501728999|PMID:18839316	GO:0003700 | GO:0003700 | GO:0003700 | GO:0003700 | GO:0003700 | GO:0003700	transcription factor activity | transcription factor activity | transcription factor activity | transcription factor activity | transcription factor activity | transcription factor activity	Publication:501720061|PMID:17059405 | Publication:492|PMID:10785665 | Publication:492|PMID:10785665 | Publication:1345963|PMID:11118137 | Communication:1674991 | Communication:1674991	GO:0006355 | GO:0006970 | GO:0009408 | GO:0009409 | GO:0009414 | GO:0009651 | GO:0010120 | GO:0010200 | GO:0042742 | GO:0050832	regulation of transcription, DNA-dependent | response to osmotic stress | response to heat | response to cold | response to water deprivation | response to salt stress | camalexin biosynthetic process | response to chitin | defense response to bacterium | defense response to fungus	Publication:492|PMID:10785665 | Publication:501728999|PMID:18839316 | Publication:501728999|PMID:18839316 | Publication:501728999|PMID:18839316 | Publication:501728999|PMID:18839316 | Publication:501728999|PMID:18839316 | Publication:501727265|PMID:18650934 | Publication:501722879|PMID:17722694 | Publication:501720061|PMID:17059405 | Publication:501720061|PMID:17059405	WRKY33	1902	194	233	213.5	622	748	685	1920	3070	2495	451	651	551	291	601	446	291	496	393.5	381	254	317.5	513	453	483	667	501	584
DGD1	AT3G11670	AT3G11670	23	840	1	NA	NA	protein_coding	DGD1 (DIGALACTOSYL DIACYLGLYCEROL DEFICIENT 1); UDP-galactosyltransferase/ galactolipid galactosyltransferase/ transferase, transferring glycosyl groups	Responsible for the final assembly of galactolipids in photosynthetic membranes. Provides stability to the PS I core complex (e.g. subunits PsaD, PsaE).	DIGALACTOSYL DIACYLGLYCEROL DEFICIENT 1 (DGD1); FUNCTIONS IN: transferase activity, transferring glycosyl groups, galactolipid galactosyltransferase activity, UDP-galactosyltransferase activity; INVOLVED IN: photosystem I stabilization, cellular response to magnesium starvation, galactolipid biosynthetic process, lipid transport, cellular response to nitrogen starvation; LOCATED IN: chloroplast o…	GO:0005739 | GO:0009707	mitochondrion | chloroplast outer membrane	Publication:501711651|PMID:14671022 | Publication:501680099|PMID:11429410	GO:0016757 | GO:0016757 | GO:0035250 | GO:0046480	transferase activity, transferring glycosyl groups | "transferase activity, transferring glycosyl groups" | UDP-galactosyltransferase activity | galactolipid galactosyltransferase activity	Publication:57|PMID:10973486 | Communication:1674999 | Publication:501714373|PMID:15590685 | Publication:1403|PMID:10381884	GO:0006869 | GO:0019375 | GO:0019375 | GO:0042550	lipid transport | galactolipid biosynthetic process | galactolipid biosynthetic process | photosystem I stabilization	Publication:1403|PMID:10381884 | Publication:1403|PMID:10381884 | Publication:1403|PMID:10381884 | Publication:501717442|PMID:15961080	DGD1	2764	2724	3389	3056.5	2820	2535	2677.5	2730	2574	2652	1807	2552	2179.5	2348	2898	2623	1439	1892	1665.5	4263	4279	4271	2802	2443	2622.5	4004	4460	4232
PCL1	AT3G46640	AT3G46640	23	315	1	NA	NA	protein_coding	PCL1 (PHYTOCLOCK 1); DNA binding / transcription factor	Encodes a myb family transcription factor with a single Myb DNA-binding domain (type SHAQKYF) that is unique to plants and is essential for circadian rhythms, specifically for transcriptional regulation within the circadian clock. LUX is required for normal rhythmic expression of multiple clock outputs in both constant light and darkness. It is coregulated with TOC1 and seems to be repressed by C…	PHYTOCLOCK 1 (PCL1); FUNCTIONS IN: transcription factor activity, DNA binding; INVOLVED IN: circadian rhythm, regulation of transcription; CONTAINS InterPro DOMAIN/s: Homeodomain-like (InterPro:IPR009057), Myb, DNA-binding (InterPro:IPR014778), Myb-type HTH DNA-binding domain (InterPro:IPR017930), Myb-like DNA-binding region, SHAQKYF class (InterPro:IPR006447), Homeodomain-related (InterPro:IPR01…	---	---	---	GO:0003677 | GO:0003700	DNA binding | transcription factor activity	Communication:501714663 | Publication:1345963|PMID:11118137	GO:0007623 | GO:0045449	circadian rhythm | regulation of transcription	Publication:501716571|PMID:16006522 | Publication:1345963|PMID:11118137	PCL1	1725	130	177	153.5	149	126	137.5	629	547	588	159	189	174	138	163	150.5	408	613	510.5	132	114	123	95	129	112	225	215	220
GATA6	AT3G51080	AT3G51080	23	145	1	AT3G51080	1	protein_coding	zinc finger (GATA type) family protein	---	zinc finger (GATA type) family protein; FUNCTIONS IN: transcription factor activity; INVOLVED IN: regulation of transcription, DNA-dependent; LOCATED IN: nucleus; CONTAINS InterPro DOMAIN/s: Zinc finger, NHR/GATA-type (InterPro:IPR013088), Transcription factor, GATA, plant (InterPro:IPR016679), Zinc finger, GATA-type (InterPro:IPR000679); BEST Arabidopsis thaliana protein match is: zinc finger (G…	GO:0005634	nucleus	AnalysisReference:501730468	GO:0003700 | GO:0003700	transcription factor activity | transcription factor activity	Communication:501714663 | Publication:1345963|PMID:11118137	GO:0006355	regulation of transcription, DNA-dependent	AnalysisReference:501730468	GATA6	1297	434	590	512	386	355	370.5	373	374	373.5	280	331	305.5	276	328	302	195	237	216	577	515	546	341	260	300.5	547	611	579
TT5	AT3G55120	AT3G55120	23	146	1	AT3G55120	1	protein_coding	TT5 (TRANSPARENT TESTA 5); chalcone isomerase	Catalyzes the conversion of chalcones into flavanones. Required for the accumulation of purple anthocyanins in leaves and stems.	TRANSPARENT TESTA 5 (TT5); FUNCTIONS IN: chalcone isomerase activity; INVOLVED IN: response to UV, response to UV-B, response to sucrose stimulus, flavonoid biosynthetic process; LOCATED IN: plant-type vacuole membrane, extrinsic to endoplasmic reticulum membrane, endoplasmic reticulum, nucleus; EXPRESSED IN: 24 plant structures; EXPRESSED DURING: 13 growth stages; CONTAINS InterPro DOMAIN/s: Cha…	GO:0005634 | GO:0005783 | GO:0005783 | GO:0009705 | GO:0042406	nucleus | endoplasmic reticulum | endoplasmic reticulum | plant-type vacuole membrane | extrinsic to endoplasmic reticulum membrane	Publication:501716341|PMID:15817473 | Publication:501680141|PMID:11489181 | Publication:501716341|PMID:15817473 | Publication:501680141|PMID:11489181 | Publication:501680141|PMID:11489181	GO:0045430	chalcone isomerase activity	Publication:5438|PMID:1354004	GO:0009411 | GO:0009813 | GO:0009813 | GO:0009813 | GO:0010224	response to UV | flavonoid biosynthetic process | flavonoid biosynthetic process | flavonoid biosynthetic process | response to UV-B	Publication:4112|PMID:8587977 | Publication:4210|PMID:8528278 | Publication:4210|PMID:8528278 | Publication:5438|PMID:1354004 | Publication:501682161|PMID:0012271060	TT5	930	1098	1279	1188.5	1064	1043	1053.5	559	538	548.5	491	587	539	644	614	629	298	360	329	1178	1617	1397.5	800	592	696	1054	1250	1152
ELIP2	AT4G14690	AT4G14690	23	151	1	AT4G14690	1	protein_coding	ELIP2 (EARLY LIGHT-INDUCIBLE PROTEIN 2); chlorophyll binding	Encodes an early light-induced protein. ELIPs are thought not to be directly involved in the synthesis and assembly of specific photosynthetic complexes, but rather affect the biogenesis of all chlorophyll-binding complexes. A study (PMID 17553115) has shown that the chlorophyll synthesis pathway was downregulated as a result of constitutive ELIP2 expression, leading to decreased chlorophyll avai…	EARLY LIGHT-INDUCIBLE PROTEIN 2 (ELIP2); FUNCTIONS IN: chlorophyll binding; INVOLVED IN: regulation of chlorophyll biosynthetic process, response to UV-B, response to red light, response to far red light; EXPRESSED IN: 14 plant structures; EXPRESSED DURING: 6 growth stages; BEST Arabidopsis thaliana protein match is: ELIP1 (EARLY LIGHT-INDUCABLE PROTEIN); chlorophyll binding (TAIR:AT3G22840.1); H…	---	---	---	GO:0016168	chlorophyll binding	Communication:501714663	GO:0010114 | GO:0010218 | GO:0010224 | GO:0010380	response to red light | response to far red light | response to UV-B | regulation of chlorophyll biosynthetic process	Publication:501720486|PMID:17076805 | Publication:501720486|PMID:17076805 | Publication:501724159|PMID:18266923 | Publication:501722582|PMID:17553115	ELIP2	806	4296	5847	5071.5	5102	5449	5275.5	2585	2701	2643	2249	3049	2649	1507	1199	1353	185	216	200.5	2880	3795	3337.5	3270	2805	3037.5	3718	3591	3654.5
TT4	AT5G13930	AT5G13930	23	189	2	AT5G13930	2	protein_coding	TT4 (TRANSPARENT TESTA 4); naringenin-chalcone synthase	Encodes chalcone synthase (CHS), a key enzyme involved in the biosynthesis of flavonoids. Required for the accumulation of purple anthocyanins in leaves and stems. Also involved in the regulation of auxin transport and the modulation of root gravitropism.	TRANSPARENT TESTA 4 (TT4); FUNCTIONS IN: naringenin-chalcone synthase activity; INVOLVED IN: in 11 processes; LOCATED IN: plant-type vacuole membrane, endoplasmic reticulum, nucleus; EXPRESSED IN: 22 plant structures; EXPRESSED DURING: 13 growth stages; CONTAINS InterPro DOMAIN/s: Thiolase-like (InterPro:IPR016039), Chalcone/stilbene synthase, N-terminal (InterPro:IPR001099), Polyketide synthase,…	GO:0005634 | GO:0005783 | GO:0005783 | GO:0009705	nucleus | endoplasmic reticulum | endoplasmic reticulum | plant-type vacuole membrane	Publication:501716341|PMID:15817473 | Publication:501680141|PMID:11489181 | Publication:501716341|PMID:15817473 | Publication:501680141|PMID:11489181	GO:0016210	naringenin-chalcone synthase activity	Publication:4210|PMID:8528278	GO:0006979 | GO:0009611 | GO:0009629 | GO:0009715 | GO:0009753 | GO:0009813 | GO:0009813 | GO:0009926 | GO:0010224 | GO:0031540	response to oxidative stress | response to wounding | response to gravity | chalcone biosynthetic process | response to jasmonic acid stimulus | flavonoid biosynthetic process | flavonoid biosynthetic process | auxin polar transport | response to UV-B | regulation of anthocyanin biosynthetic process	Publication:2678|PMID:9501110 | Publication:501717417|PMID:16021335 | Publication:501718505|PMID:16489132 | Publication:4210|PMID:8528278 | Publication:501717417|PMID:16021335 | Publication:4210|PMID:8528278 | Publication:5725|PMID:3386631 | Publication:501680732|PMID:11402184 | Publication:501682161|PMID:0012271060 | Publication:501716355|PMID:15993620	TT4	1491	7311	7433	7372	10748	10013	10380.5	3014	2206	2610	2938	3924	3431	2201	1647	1924	405	422	413.5	7394	14656	11025	7641	6861	7251	6001	6729	6365
RVE1	AT5G17300	AT5G17300	23	362	1	NA	NA	protein_coding	myb family transcription factor	---	myb family transcription factor; FUNCTIONS IN: transcription factor activity; INVOLVED IN: regulation of transcription; EXPRESSED IN: 22 plant structures; EXPRESSED DURING: 15 growth stages; CONTAINS InterPro DOMAIN/s: SANT, DNA-binding (InterPro:IPR001005), Myb, DNA-binding (InterPro:IPR014778), Homeodomain-like (InterPro:IPR009057), Myb-like DNA-binding region, SHAQKYF class (InterPro:IPR006447…	---	---	---	GO:0003700	transcription factor activity	Publication:1345963|PMID:11118137	GO:0045449	regulation of transcription	Publication:1345963|PMID:11118137	RVE1	1839	3400	3512	3456	3197	2707	2952	1940	1778	1859	2220	3079	2649.5	2732	3514	3123	752	894	823	4029	4170	4099.5	3877	2990	3433.5	2942	3346	3144
RS6	AT5G20250	AT5G20250	23	1095	1	NA	NA	protein_coding	DIN10 (DARK INDUCIBLE 10); hydrolase, hydrolyzing O-glycosyl compounds	encodes a member of glycosyl hydrolase family 36. Expression is induced within 3 hours of dark treatment, in senescing leaves and treatment with exogenous photosynthesis inhibitor. Induction of gene expression was suppressed in excised leaves supplied with sugar. The authors suggest that the gene's expression pattern is responding to the level of sugar in the cell.	DARK INDUCIBLE 10 (DIN10); FUNCTIONS IN: hydrolase activity, hydrolyzing O-glycosyl compounds; INVOLVED IN: response to light stimulus, aging, response to sucrose stimulus; LOCATED IN: chloroplast; EXPRESSED IN: 24 plant structures; EXPRESSED DURING: 14 growth stages; CONTAINS InterPro DOMAIN/s: Glycoside hydrolase, catalytic core (InterPro:IPR017853), Raffinose synthase (InterPro:IPR008811); BES…	GO:0009507	chloroplast	Publication:501724486|PMID:18431481	GO:0004553	hydrolase activity, hydrolyzing O-glycosyl compounds	Communication:501714663	GO:0007568 | GO:0009409 | GO:0009416 | GO:0009744	aging | response to cold | response to light stimulus | response to sucrose stimulus	Publication:501683242|PMID:11240919 | Publication:501730567|PMID:19502356 | Publication:501683242|PMID:11240919 | Publication:501683242|PMID:11240919	RS6	2945	1414	1542	1478	2453	1753	2103	5557	5069	5313	1946	3299	2622.5	3528	3876	3702	9537	14017	11777	934	1339	1136.5	1561	1487	1524	1449	1759	1604
AT5G47390	AT5G47390	AT5G47390	23	378	1	NA	NA	protein_coding	myb family transcription factor	---	myb family transcription factor; FUNCTIONS IN: transcription factor activity, DNA binding; INVOLVED IN: in 8 processes; EXPRESSED IN: 24 plant structures; EXPRESSED DURING: 15 growth stages; CONTAINS InterPro DOMAIN/s: SANT, DNA-binding (InterPro:IPR001005), Homeodomain-like (InterPro:IPR009057), Myb, DNA-binding (InterPro:IPR014778), Zinc finger, CCHC-type (InterPro:IPR001878), Myb-type HTH DNA-…	---	---	---	GO:0003677 | GO:0003700	DNA binding | transcription factor activity	Communication:501714663 | Publication:1345963|PMID:11118137	GO:0009651 | GO:0009723 | GO:0009737 | GO:0009739 | GO:0009751 | GO:0009753 | GO:0045449 | GO:0046686	response to salt stress | response to ethylene stimulus | response to abscisic acid stimulus | response to gibberellin stimulus | response to salicylic acid stimulus | response to jasmonic acid stimulus | regulation of transcription | response to cadmium ion	Publication:501718564|PMID:16463103 | Publication:501718564|PMID:16463103 | Publication:501718564|PMID:16463103 | Publication:501718564|PMID:16463103 | Publication:501718564|PMID:16463103 | Publication:501718564|PMID:16463103 | Publication:1345963|PMID:11118137 | Publication:501718564|PMID:16463103	AT5G47390	1621	453	546	499.5	656	642	649	334	255	294.5	585	803	694	898	1116	1007	843	1111	977	583	677	630	878	741	809.5	520	553	536.5
ASN2	AT5G65010	AT5G65010	23	227	2	AT5G65010	2	protein_coding	ASN2 (ASPARAGINE SYNTHETASE 2); asparagine synthase (glutamine-hydrolyzing)	Encodes asparagine synthetase (ASN2).	ASPARAGINE SYNTHETASE 2 (ASN2); FUNCTIONS IN: asparagine synthase (glutamine-hydrolyzing) activity; INVOLVED IN: asparagine biosynthetic process, metabolic process; EXPRESSED IN: 23 plant structures; EXPRESSED DURING: 13 growth stages; CONTAINS InterPro DOMAIN/s: Glutamine amidotransferase, class-II (InterPro:IPR000583), Rossmann-like alpha/beta/alpha sandwich fold (InterPro:IPR014729), Asparagin…	---	---	---	GO:0004066 | GO:0004066 | GO:0004066	asparagine synthase (glutamine-hydrolyzing) activity | asparagine synthase (glutamine-hydrolyzing) activity | asparagine synthase (glutamine-hydrolyzing) activity	Communication:501714663 | AnalysisReference:501730468 | AnalysisReference:501730468	GO:0006529 | GO:0006529 | GO:0008152	asparagine biosynthetic process | asparagine biosynthetic process | metabolic process	Communication:501714663 | AnalysisReference:501730468 | AnalysisReference:501730468	ASN2	2072	6817	7563	7190	5208	3980	4594	21497	18194	19845.5	5964	6144	6054	3957	4605	4281	3344	4690	4017	4681	5408	5044.5	2163	2119	2141	9491	11682	10586.5
GGT2	AT1G70580	AT1G70580	22	399	1	NA	NA	protein_coding	AOAT2 (ALANINE-2-OXOGLUTARATE AMINOTRANSFERASE 2); L-alanine:2-oxoglutarate aminotransferase/ glycine:2-oxoglutarate aminotransferase	Similar to glutamate-glyoxylate transaminase enzyme encoded by AOAT1	ALANINE-2-OXOGLUTARATE AMINOTRANSFERASE 2 (AOAT2); FUNCTIONS IN: glycine:2-oxoglutarate aminotransferase activity, L-alanine:2-oxoglutarate aminotransferase activity; INVOLVED IN: photorespiration; LOCATED IN: chloroplast, peroxisome; EXPRESSED IN: 22 plant structures; EXPRESSED DURING: 11 growth stages; CONTAINS InterPro DOMAIN/s: 1-aminocyclopropane-1-carboxylate synthase (InterPro:IPR001176), …	GO:0005777 | GO:0005777 | GO:0005777 | GO:0009507 | GO:0009570	peroxisome | peroxisome | peroxisome | chloroplast | chloroplast stroma	Publication:501681862|PMID:12154131 | Publication:501683563|PMID:12631323 | Publication:501723317|PMID:17951448 | Publication:501724486|PMID:18431481 | Publication:501727324|PMID:18633119	GO:0004021 | GO:0047958	L-alanine:2-oxoglutarate aminotransferase activity | glycine:2-oxoglutarate aminotransferase activity	Communication:501714663 | Publication:501683563|PMID:12631323	GO:0009853	photorespiration	Publication:501682443	GGT2	2090	2891	3386	3138.5	4755	4083	4419	2256	2205	2230.5	3810	5173	4491.5	4665	5884	5274.5	3418	4255	3836.5	3613	4010	3811.5	4352	3665	4008.5	3081	3353	3217
PR5	AT1G75040	AT1G75040	22	70	1	AT1G75040	1	protein_coding	PR5 (PATHOGENESIS-RELATED GENE 5)	Thaumatin-like protein involved in response to pathogens. mRNA level of the PR-5 gene (At1g75040)is significantly changed after cutting the inflorescence stem indicating the existence of a network of signal transducing pathways as other stress-regulated genes (At5g01410, At3g17800, At1g29930)do not response to the treatment.	PATHOGENESIS-RELATED GENE 5 (PR5); FUNCTIONS IN: molecular_function unknown; INVOLVED IN: response to UV-B, systemic acquired resistance, response to other organism, regulation of anthocyanin biosynthetic process; LOCATED IN: apoplast, cell wall, vacuole; EXPRESSED IN: 22 plant structures; EXPRESSED DURING: 12 growth stages; CONTAINS InterPro DOMAIN/s: Thaumatin, conserved site (InterPro:IPR01794…	GO:0005618 | GO:0005773 | GO:0048046	cell wall | vacuole | apoplast	Publication:501714811|PMID:15593128 | Publication:501714874|PMID:15539469 | Publication:501725189|PMID:18538804	GO:0003674	molecular_function	Communication:501683652	GO:0009627 | GO:0009627 | GO:0010224 | GO:0031540 | GO:0051707	systemic acquired resistance | systemic acquired resistance | response to UV-B | regulation of anthocyanin biosynthetic process | response to other organism	Publication:5394|PMID:1392589 | Publication:501721438|PMID:17419843 | Publication:501714274|PMID:15474373 | Publication:501716355|PMID:15993620 | Communication:501714663	PR5	980	185	245	215	243	270	256.5	52	68	60	216	285	250.5	308	444	376	368	590	479	339	378	358.5	357	296	326.5	329	365	347
PAP1	AT2G01180	AT2G01180	22	76	1	AT2G01180	1	protein_coding	ATPAP1 (PHOSPHATIDIC ACID PHOSPHATASE 1); phosphatidate phosphatase	Encodes phosphatidate phosphatase. Up-regulated by genotoxic stress (gamma ray or UV-B) and elicitor treatments with mastoparan and harpin. Expressed in roots and leaves.	PHOSPHATIDIC ACID PHOSPHATASE 1 (ATPAP1); FUNCTIONS IN: phosphatidate phosphatase activity; INVOLVED IN: phospholipid metabolic process, response to stress; LOCATED IN: plasma membrane, integral to plasma membrane; EXPRESSED IN: 15 plant structures; EXPRESSED DURING: 8 growth stages; CONTAINS InterPro DOMAIN/s: Phosphatidic acid phosphatase/chloroperoxidase, N-terminal (InterPro:IPR016118), Phosp…	GO:0005886 | GO:0005887	plasma membrane | integral to plasma membrane	Publication:501720929|PMID:17317660 | Publication:501680697|PMID:11278556	GO:0008195 | GO:0008195	phosphatidate phosphatase activity | phosphatidate phosphatase activity	Publication:501680697|PMID:11278556 | Communication:501714663	GO:0006644 | GO:0006950	phospholipid metabolic process | response to stress	Publication:1546677 | Publication:501680697|PMID:11278556	PAP1	1904	112	149	130.5	176	119	147.5	395	586	490.5	153	237	195	153	209	181	158	208	183	142	103	122.5	184	158	171	162	219	190.5
AT2G03500	AT2G03500	AT2G03500	22	273	1	NA	NA	protein_coding	myb family transcription factor	---	myb family transcription factor; FUNCTIONS IN: transcription factor activity, DNA binding; INVOLVED IN: regulation of transcription; EXPRESSED IN: 7 plant structures; EXPRESSED DURING: 4 anthesis, LP.04 four leaves visible, petal differentiation and expansion stage; CONTAINS InterPro DOMAIN/s: Homeodomain-like (InterPro:IPR009057), Myb, DNA-binding (InterPro:IPR014778), Myb-type HTH DNA-binding d…	---	---	---	GO:0003677 | GO:0003700	DNA binding | transcription factor activity	Communication:501714663 | Publication:1345963|PMID:11118137	GO:0045449	regulation of transcription	Publication:1345963|PMID:11118137	AT2G03500	1666	136	182	159	74	64	69	177	189	183	151	162	156.5	106	133	119.5	104	151	127.5	57	74	65.5	95	96	95.5	165	199	182
GPRI1	AT2G20570	AT2G20570	22	277	1	NA	NA	protein_coding	GPRI1 (GBF'S PRO-RICH REGION-INTERACTING FACTOR 1); transcription factor/ transcription regulator	Encodes GLK1, Golden2-like 1, one of a pair of partially redundant nuclear transcription factors that regulate chloroplast development in a cell-autonomous manner. GLK2, Golden2-like 2, is encoded by At5g44190. GLK1 and GLK2 regulate the expression of the photosynthetic apparatus.	GBF'S PRO-RICH REGION-INTERACTING FACTOR 1 (GPRI1); FUNCTIONS IN: transcription factor activity, transcription regulator activity; INVOLVED IN: chloroplast organization, positive regulation of transcription, negative regulation of flower development; EXPRESSED IN: 18 plant structures; EXPRESSED DURING: 12 growth stages; CONTAINS InterPro DOMAIN/s: Homeodomain-like (InterPro:IPR009057), Myb, DNA-b…	---	---	---	GO:0003700 | GO:0003700 | GO:0030528	transcription factor activity | transcription factor activity | transcription regulator activity	Publication:501730198|PMID:19376934 | Publication:1345963|PMID:11118137 | Publication:501681953|PMID:11828027	GO:0009658 | GO:0009910 | GO:0010380 | GO:0043193 | GO:0045941	chloroplast organization | negative regulation of flower development | regulation of chlorophyll biosynthetic process | positive regulation of gene-specific transcription | positive regulation of transcription	Publication:501727284|PMID:18643989 | Publication:501727284|PMID:18643989 | Publication:501730198|PMID:19376934 | Publication:501730198|PMID:19376934 | Publication:501681953|PMID:11828027	GPRI1	1673	4921	5830	5375.5	6640	6237	6438.5	3072	2986	3029	4181	5245	4713	4670	5598	5134	2848	3697	3272.5	6182	6997	6589.5	5097	4279	4688	6110	7040	6575
WRKY46	AT2G46400	AT2G46400	22	301	1	NA	NA	protein_coding	WRKY46; transcription factor	member of WRKY Transcription Factor; Group III	WRKY46; FUNCTIONS IN: transcription factor activity; INVOLVED IN: response to chitin, regulation of transcription, DNA-dependent; LOCATED IN: nucleolus; EXPRESSED IN: 22 plant structures; EXPRESSED DURING: 13 growth stages; CONTAINS InterPro DOMAIN/s: DNA-binding WRKY (InterPro:IPR003657); BEST Arabidopsis thaliana protein match is: WRKY53; DNA binding / protein binding / transcription activator/…	GO:0005730	nucleolus	Publication:501714452|PMID:15610358	GO:0003700 | GO:0003700 | GO:0003700 | GO:0003700 | GO:0003700 | GO:0003700	transcription factor activity | transcription factor activity | transcription factor activity | transcription factor activity | transcription factor activity | transcription factor activity	Publication:492|PMID:10785665 | Communication:1674991 | Communication:1674991 | Publication:1345963|PMID:11118137 | Publication:492|PMID:10785665 | Publication:492|PMID:10785665	GO:0006355 | GO:0010200	regulation of transcription, DNA-dependent | response to chitin	Publication:492|PMID:10785665 | Publication:501722879|PMID:17722694	WRKY46	1222	25	26	25.5	63	77	70	193	255	224	27	63	45	24	67	45.5	19	19	19	54	42	48	45	36	40.5	57	45	51
UVR3	AT3G15620	AT3G15620	22	119	1	AT3G15620	1	protein_coding	UVR3 (UV REPAIR DEFECTIVE 3); DNA (6-4) photolyase	Required for photorepair of 6-4 photoproducts in Arabidopsis thaliana.	UV REPAIR DEFECTIVE 3 (UVR3); FUNCTIONS IN: DNA (6-4) photolyase activity; INVOLVED IN: response to UV, pyrimidine dimer repair; EXPRESSED IN: 24 plant structures; EXPRESSED DURING: 15 growth stages; CONTAINS InterPro DOMAIN/s: Rossmann-like alpha/beta/alpha sandwich fold (InterPro:IPR014729), DNA photolyase, N-terminal (InterPro:IPR006050), DNA photolyase, FAD-binding/Cryptochrome, C-terminal (I…	---	---	---	GO:0003914 | GO:0003914	DNA (6-4) photolyase activity | DNA (6-4) photolyase activity	Publication:2796|PMID:9421527 | Publication:2796|PMID:9421527	GO:0006290 | GO:0009411	pyrimidine dimer repair | response to UV	Publication:2172|PMID:9750104 | Publication:2172|PMID:9750104	UVR3	2018	102	116	109	70	56	63	324	273	298.5	50	91	70.5	71	71	71	115	137	126	87	88	87.5	75	60	67.5	114	103	108.5
RR5	AT3G48100	AT3G48100	22	1801	2	NA	NA	protein_coding	ARR5 (ARABIDOPSIS RESPONSE REGULATOR 5); transcription regulator/ two-component response regulator	Encodes a transcription repressor that mediates a negative feedback loop in cytokinin signalling. ARR5 expression is upregulated by Class I KNOX genes. Arr5 protein is stabilized by cytokinin in a two-component phosphorelay.	ARABIDOPSIS RESPONSE REGULATOR 5 (ARR5); FUNCTIONS IN: transcription regulator activity, two-component response regulator activity; INVOLVED IN: response to red light, cytokinin mediated signaling, circadian rhythm, response to cytokinin stimulus; LOCATED IN: nucleus, cytoplasm; EXPRESSED IN: 30 plant structures; EXPRESSED DURING: 13 growth stages; CONTAINS InterPro DOMAIN/s: CheY-like (InterPro:…	GO:0005634 | GO:0005737	nucleus | cytoplasm	Publication:501727302|PMID:18642946 | Publication:501727302|PMID:18642946	GO:0000156 | GO:0000156 | GO:0000156 | GO:0000156 | GO:0000156 | GO:0030528	two-component response regulator activity | two-component response regulator activity | two-component response regulator activity | two-component response regulator activity | two-component response regulator activity | transcription regulator activity	Publication:501723793|PMID:18065689 | Publication:2577|PMID:9607306 | Publication:501680564|PMID:11574878 | Communication:1675000 | Publication:501681565|PMID:12068096 | Publication:501681565|PMID:12068096	GO:0007623 | GO:0009735 | GO:0009735 | GO:0009735 | GO:0009736 | GO:0009736 | GO:0010114	circadian rhythm | response to cytokinin stimulus | response to cytokinin stimulus | response to cytokinin stimulus | cytokinin mediated signaling | cytokinin mediated signaling | response to red light	Publication:501718302|PMID:16326927 | Publication:1345976|PMID:11115887 | Publication:2483|PMID:9634588 | Publication:501718422|PMID:16407152 | Publication:501723793|PMID:18065689 | Publication:501681565|PMID:12068096 | Publication:501711897|PMID:14973166	RR5	1374	37	50	43.5	23	15	19	296	360	328	29	21	25	31	28	29.5	43	54	48.5	44	28	36	6	3	4.5	51	61	56
LBD38	AT3G49940	AT3G49940	22	316	1	NA	NA	protein_coding	LBD38 (LOB DOMAIN-CONTAINING PROTEIN 38)	---	LOB DOMAIN-CONTAINING PROTEIN 38 (LBD38); INVOLVED IN: biological_process unknown; LOCATED IN: cellular_component unknown; EXPRESSED IN: 21 plant structures; EXPRESSED DURING: 13 growth stages; CONTAINS InterPro DOMAIN/s: Lateral organ boundaries, LOB (InterPro:IPR004883); BEST Arabidopsis thaliana protein match is: LBD37 (LOB DOMAIN-CONTAINING PROTEIN 37) (TAIR:AT5G67420.1); Has 325 Blast hits t…	GO:0005575	cellular_component	Communication:1345790	---	---	---	GO:0008150	biological_process	Communication:1345790	LBD38	1039	223	224	223.5	1094	739	916.5	983	1015	999	454	700	577	539	677	608	489	843	666	776	787	781.5	693	476	584.5	403	513	458
KAN3	AT4G17695	AT4G17695	22	339	1	NA	NA	protein_coding	KAN3 (KANADI 3); DNA binding / transcription factor	---	KANADI 3 (KAN3); FUNCTIONS IN: transcription factor activity, DNA binding; INVOLVED IN: regulation of transcription; EXPRESSED IN: 21 plant structures; EXPRESSED DURING: 10 growth stages; CONTAINS InterPro DOMAIN/s: Homeodomain-like (InterPro:IPR009057), Myb, DNA-binding (InterPro:IPR014778), Myb-like DNA-binding region, SHAQKYF class (InterPro:IPR006447), Homeodomain-related (InterPro:IPR012287)…	---	---	---	GO:0003677 | GO:0003700 | GO:0003700	DNA binding | transcription factor activity | transcription factor activity	Communication:501714663 | Publication:1345963|PMID:11118137 | Publication:1345963|PMID:11118137	GO:0045449	regulation of transcription	Publication:1345963|PMID:11118137	KAN3	1077	182	213	197.5	153	164	158.5	141	132	136.5	92	125	108.5	97	132	114.5	90	105	97.5	196	197	196.5	130	100	115	205	237	221
AT4G27900	AT4G27900	AT4G27900	22	344	2	NA	NA	protein_coding	---	---	FUNCTIONS IN: molecular_function unknown; INVOLVED IN: biological_process unknown; LOCATED IN: cellular_component unknown; EXPRESSED IN: 23 plant structures; EXPRESSED DURING: 13 growth stages; CONTAINS InterPro DOMAIN/s: CCT domain (InterPro:IPR010402); BEST Arabidopsis thaliana protein match is: unknown protein (TAIR:AT5G53420.1); Has 876 Blast hits to 876 proteins in 63 species: Archae - 0; Ba…	GO:0005575	cellular_component	Communication:1345790	GO:0003674	molecular_function	Communication:501683652	GO:0008150	biological_process	Communication:1345790	AT4G27900	1296	63	52	57.5	87	83	85	138	98	118	78	102	90	159	131	145	118	191	154.5	63	73	68	92	91	91.5	81	91	86
SUR2	AT4G31500	AT4G31500	22	165	2	AT4G31500	2	protein_coding	CYP83B1 (CYTOCHROME P450 MONOOXYGENASE 83B1); oxidoreductase, acting on paired donors, with incorporation or reduction of molecular oxygen, NADH or NADPH as one donor, and incorporation of one atom of oxygen / oxygen binding	Encodes an oxime-metabolizing enzyme in the biosynthetic pathway of glucosinolates. Is required for phytochrome signal transduction in red light. Mutation confers auxin overproduction.	CYTOCHROME P450 MONOOXYGENASE 83B1 (CYP83B1); FUNCTIONS IN: oxidoreductase activity, acting on paired donors, with incorporation or reduction of molecular oxygen, NADH or NADPH as one donor, and incorporation of one atom of oxygen, oxygen binding; INVOLVED IN: in 8 processes; LOCATED IN: mitochondrion, endoplasmic reticulum, plasma membrane, membrane; EXPRESSED IN: 24 plant structures; EXPRESSED …	GO:0005739 | GO:0005783 | GO:0005886 | GO:0016020	mitochondrion | endoplasmic reticulum | plasma membrane | membrane	Publication:501711651|PMID:14671022 | Publication:501718909|PMID:16618929 | Publication:501720929|PMID:17317660 | Publication:501721401|PMID:17432890	GO:0016709 | GO:0019825	oxidoreductase activity, acting on paired donors, with incorporation or reduction of molecular oxygen, NADH or NADPH as one donor, and incorporation of one atom of oxygen | oxygen binding	Publication:501710579|PMID:12970475 | Communication:501714663	GO:0000162 | GO:0009641 | GO:0009684 | GO:0009759 | GO:0010114 | GO:0042742 | GO:0048830 | GO:0052544	tryptophan biosynthetic process | shade avoidance | indoleacetic acid biosynthetic process | indole glucosinolate biosynthetic process | response to red light | defense response to bacterium | adventitious root development | callose deposition in cell wall during defense response	Publication:1546113|PMID:11805067 | Publication:3276|PMID:9165750 | Publication:1345726|PMID:11114200 | Publication:501680526|PMID:11553739 | Publication:3276|PMID:9165750 | Publication:501729298|PMID:19095898 | Publication:501718157|PMID:16377752 | Publication:501729298|PMID:19095898	SUR2	1745	2237	2439	2338	2837	2402	2619.5	2425	2286	2355.5	1021	1185	1103	1398	1404	1401	1197	1641	1419	3259	3344	3301.5	1119	1088	1103.5	3248	4134	3691
MYB4	AT4G38620	AT4G38620	22	173	1	AT4G38620	1	protein_coding	MYB4; DNA binding / transcription factor	Encodes a R2R3 MYB protein which is involved in the response to UV-B. It functions as a repressor of target gene expression. One of its target genes encodes cinnamate 4-hydroxylase; mutants accumulate sinapate esters in their leaves. MYB4 binds to its own promoter and represses its own expression. Nuclear localization of MYB4 depends on the action of the beta importin SAD2.	MYB4; FUNCTIONS IN: transcription factor activity, DNA binding; INVOLVED IN: in 10 processes; EXPRESSED IN: 22 plant structures; EXPRESSED DURING: 13 growth stages; CONTAINS InterPro DOMAIN/s: SANT, DNA-binding (InterPro:IPR001005), Homeodomain-like (InterPro:IPR009057), Myb, DNA-binding (InterPro:IPR014778), Myb-type HTH DNA-binding domain (InterPro:IPR017930), Homeodomain-related (InterPro:IPR0…	---	---	---	GO:0003677 | GO:0003700	DNA binding | transcription factor activity	Publication:501723593|PMID:17993626 | Publication:1345963|PMID:11118137	GO:0009651 | GO:0009723 | GO:0009733 | GO:0009737 | GO:0009739 | GO:0009751 | GO:0009753 | GO:0010224 | GO:0010224 | GO:0016481 | GO:0046686	response to salt stress | response to ethylene stimulus | response to auxin stimulus | response to abscisic acid stimulus | response to gibberellin stimulus | response to salicylic acid stimulus | response to jasmonic acid stimulus | response to UV-B | response to UV-B | negative regulation of transcription | response to cadmium ion	Publication:501718564|PMID:16463103 | Publication:501718564|PMID:16463103 | Publication:501718564|PMID:16463103 | Publication:501718564|PMID:16463103 | Publication:501718564|PMID:16463103 | Publication:501718564|PMID:16463103 | Publication:501718564|PMID:16463103 | Publication:5889|PMID:11080161 | Publication:5889|PMID:11080161 | Publication:5889|PMID:11080161 | Publication:501718564|PMID:16463103	MYB4	1287	1440	1657	1548.5	572	505	538.5	340	284	312	672	673	672.5	585	568	576.5	370	407	388.5	1023	1055	1039	534	433	483.5	1080	1240	1160
KNAT3	AT5G25220	AT5G25220	22	193	1	AT5G25220	1	protein_coding	KNAT3 (KNOTTED1-LIKE HOMEOBOX GENE 3); transcription activator/ transcription factor	A member of class II knotted1-like homeobox gene family (together with KNAT4 and KNAT5). Expressed in: hypocotyl-root boundary, anther-filament junction in flowers, ovule-funiculus and peduncle-silique boundaries, petioles and root. Light-regulated expression with differential response to red/far-red light. KNAT3 promoter activity showed cell-type specific pattern along longitudinal root axis, re…	KNOTTED1-LIKE HOMEOBOX GENE 3 (KNAT3); FUNCTIONS IN: transcription factor activity, transcription activator activity; INVOLVED IN: response to light stimulus, detection of cytokinin stimulus; LOCATED IN: cytosol, nucleus; EXPRESSED IN: 37 plant structures; EXPRESSED DURING: 13 growth stages; CONTAINS InterPro DOMAIN/s: ELK (InterPro:IPR005539), KNOX1 (InterPro:IPR005540), Homeobox (InterPro:IPR00…	GO:0005634 | GO:0005829	nucleus | cytosol	Publication:501718568|PMID:16463096 | Publication:501718568|PMID:16463096	GO:0003700 | GO:0016563	transcription factor activity | transcription activator activity	Publication:1345963|PMID:11118137 | Publication:3607|PMID:8980519	GO:0009416 | GO:0009722	response to light stimulus | detection of cytokinin stimulus	Publication:3312|PMID:9161040 | Publication:501718568|PMID:16463096	KNAT3	1899	2328	2797	2562.5	2808	2570	2689	1893	1954	1923.5	1716	2378	2047	1787	2321	2054	1056	1345	1200.5	2647	2915	2781	2340	1817	2078.5	2558	3044	2801
RVE2	AT5G37260	AT5G37260	22	369	1	NA	NA	protein_coding	RVE2 (REVEILLE 2); DNA binding / transcription factor	Encodes a MYB family transcription factor Circadian 1 (CIR1). Involved in circadian regulation in Arabidopsis.	REVEILLE 2 (RVE2); FUNCTIONS IN: transcription factor activity, DNA binding; INVOLVED IN: in 11 processes; EXPRESSED IN: 22 plant structures; EXPRESSED DURING: 13 growth stages; CONTAINS InterPro DOMAIN/s: SANT, DNA-binding (InterPro:IPR001005), Myb, DNA-binding (InterPro:IPR014778), Homeodomain-like (InterPro:IPR009057), Myb-like DNA-binding region, SHAQKYF class (InterPro:IPR006447), Myb-type H…	---	---	---	GO:0003677 | GO:0003700	DNA binding | transcription factor activity	Communication:501714663 | Publication:1345963|PMID:11118137	GO:0007623 | GO:0009651 | GO:0009723 | GO:0009733 | GO:0009737 | GO:0009739 | GO:0009751 | GO:0009753 | GO:0009845 | GO:0009909 | GO:0045449	circadian rhythm | response to salt stress | response to ethylene stimulus | response to auxin stimulus | response to abscisic acid stimulus | response to gibberellin stimulus | response to salicylic acid stimulus | response to jasmonic acid stimulus | seed germination | regulation of flower development | regulation of transcription	Publication:501722448|PMID:17587236 | Publication:501718564|PMID:16463103 | Publication:501718564|PMID:16463103 | Publication:501718564|PMID:16463103 | Publication:501718564|PMID:16463103 | Publication:501718564|PMID:16463103 | Publication:501718564|PMID:16463103 | Publication:501718564|PMID:16463103 | Publication:501722448|PMID:17587236 | Publication:501722448|PMID:17587236 | Publication:1345963…	RVE2	980	699	655	677	767	568	667.5	2931	2179	2555	421	449	435	388	370	379	253	363	308	815	958	886.5	530	458	494	803	1019	911
ERF2	AT5G47220	AT5G47220	22	377	2	NA	NA	protein_coding	ERF2 (ETHYLENE RESPONSIVE ELEMENT BINDING FACTOR 2); DNA binding / transcription activator/ transcription factor	Encodes a member of the ERF (ethylene response factor) subfamily B-3 of ERF/AP2 transcription factor family (ATERF-2). The protein contains one AP2 domain. Functions as activator of GCC box–dependent transcription. Positive regulator of JA-responsive defense genes and resistance to F. oxysporum and enhances JA inhibition of root elongation.	ETHYLENE RESPONSIVE ELEMENT BINDING FACTOR 2 (ERF2); FUNCTIONS IN: transcription factor activity, transcription activator activity, DNA binding; INVOLVED IN: ethylene mediated signaling pathway, positive regulation of transcription, induced systemic resistance, jasmonic acid mediated signaling pathway, response to chitin, regulation of transcription, DNA-dependent; LOCATED IN: nucleus; EXPRESSED …	GO:0005634 | GO:0005634	nucleus | nucleus	Publication:2298|PMID:9687012 | Publication:665|PMID:10715325	GO:0003677 | GO:0003700 | GO:0003700 | GO:0003700 | GO:0016563 | GO:0016563	DNA binding | transcription factor activity | transcription factor activity | transcription factor activity | transcription activator activity | transcription activator activity	Publication:665|PMID:10715325 | Publication:665|PMID:10715325 | Publication:665|PMID:10715325 | Publication:1345963|PMID:11118137 | Publication:501717630|PMID:16183832 | Publication:665|PMID:10715325	GO:0006355 | GO:0009864 | GO:0009873 | GO:0009873 | GO:0010200 | GO:0045941	regulation of transcription, DNA-dependent | "induced systemic resistance, jasmonic acid mediated signaling pathway" | ethylene mediated signaling pathway | ethylene mediated signaling pathway | response to chitin | positive regulation of transcription	Publication:665|PMID:10715325 | Publication:501717630|PMID:16183832 | Publication:2298|PMID:9687012 | Publication:665|PMID:10715325 | Publication:501722879|PMID:17722694 | Publication:665|PMID:10715325	ERF2	962	10	12	11	13	23	18	28	36	32	23	33	28	37	43	40	71	115	93	18	22	20	29	19	24	23	25	24
PFG3	AT5G49330	AT5G49330	22	203	2	AT5G49330	2	protein_coding	AtMYB111 (myb domain protein 111); DNA binding / transcription factor	Member of the R2R3 factor gene family.	myb domain protein 111 (AtMYB111); FUNCTIONS IN: transcription factor activity, DNA binding; INVOLVED IN: regulation of transcription, DNA-dependent, regulation of transcription; EXPRESSED IN: 14 plant structures; EXPRESSED DURING: 6 growth stages; CONTAINS InterPro DOMAIN/s: SANT, DNA-binding (InterPro:IPR001005), Homeodomain-like (InterPro:IPR009057), Myb, DNA-binding (InterPro:IPR014778), Myb-…	---	---	---	GO:0003677 | GO:0003700 | GO:0003700	DNA binding | transcription factor activity | transcription factor activity	Communication:501714663 | Publication:1545956|PMID:11597504 | Publication:1345963|PMID:11118137	GO:0006355 | GO:0051555	regulation of transcription, DNA-dependent | flavonol biosynthetic process	Communication:501714663 | Publication:501721436|PMID:17419845	PFG3	1309	358	451	404.5	69	55	62	557	457	507	73	53	63	24	49	36.5	32	45	38.5	155	161	158	81	59	70	574	662	618
GNC	AT5G56860	AT5G56860	22	212	1	AT5G56860	1	protein_coding	GNC (GATA, nitrate-inducible, carbon metabolism-involved); transcription factor	---	GATA, nitrate-inducible, carbon metabolism-involved (GNC); FUNCTIONS IN: transcription factor activity; INVOLVED IN: glucose mediated signaling, regulation of nitrogen compound metabolic process; LOCATED IN: nucleus; EXPRESSED IN: 18 plant structures; EXPRESSED DURING: 12 growth stages; CONTAINS InterPro DOMAIN/s: Zinc finger, NHR/GATA-type (InterPro:IPR013088), Zinc finger, GATA-type (InterPro:I…	GO:0005634	nucleus	AnalysisReference:501730468	GO:0003700 | GO:0003700	transcription factor activity | transcription factor activity	Communication:501714663 | Publication:1345963|PMID:11118137	GO:0010255 | GO:0010255 | GO:0051171 | GO:0051171	glucose mediated signaling | glucose mediated signaling | regulation of nitrogen compound metabolic process | regulation of nitrogen compound metabolic process	Publication:501717963|PMID:16262716 | Publication:501717963|PMID:16262716 | Publication:501717963|PMID:16262716 | Publication:501717963|PMID:16262716	GNC	1678	2617	3072	2844.5	1996	1592	1794	4695	4722	4708.5	1425	1935	1680	1398	1811	1604.5	1002	1127	1064.5	1546	1532	1539	1547	1295	1421	3032	3610	3321
CIA2	AT5G57180	AT5G57180	22	384	1	NA	NA	protein_coding	CIA2 (CHLOROPLAST IMPORT APPARATUS 2); transcription regulator	Transcription regulator responsible for specific upregulation of the translocon genes atToc33 and atToc75 in leaves. Involved in protein import into chloroplast.	CHLOROPLAST IMPORT APPARATUS 2 (CIA2); FUNCTIONS IN: transcription regulator activity; INVOLVED IN: protein targeting to chloroplast; LOCATED IN: nucleus; EXPRESSED IN: 19 plant structures; EXPRESSED DURING: 12 growth stages; BEST Arabidopsis thaliana protein match is: CIL (TAIR:AT4G25990.2); Has 76 Blast hits to 55 proteins in 15 species: Archae - 0; Bacteria - 0; Metazoa - 5; Fungi - 6; Plants …	GO:0005634	nucleus	Publication:501683656|PMID:11549763	GO:0030528	transcription regulator activity	Publication:501683656|PMID:11549763	GO:0045036	protein targeting to chloroplast	Publication:501683656|PMID:11549763	CIA2	2525	3460	4260	3860	2788	2391	2589.5	3047	3143	3095	1766	2323	2044.5	2384	2905	2644.5	2270	3177	2723.5	2360	2580	2470	1744	1279	1511.5	4003	4722	4362.5
AT1G07520	AT1G07520	AT1G07520	21	237	1	NA	NA	protein_coding	scarecrow transcription factor family protein	---	scarecrow transcription factor family protein; FUNCTIONS IN: transcription factor activity; INVOLVED IN: response to chitin; LOCATED IN: cellular_component unknown; EXPRESSED IN: 14 plant structures; EXPRESSED DURING: 7 growth stages; CONTAINS InterPro DOMAIN/s: GRAS transcription factor (InterPro:IPR005202); BEST Arabidopsis thaliana protein match is: scarecrow transcription factor family protei…	GO:0005575	cellular_component	Communication:1345790	GO:0003700	transcription factor activity	Communication:501714663	GO:0010200	response to chitin	Publication:501722879|PMID:17722694	AT1G07520	2242	60	99	79.5	113	116	114.5	281	280	280.5	129	148	138.5	97	144	120.5	106	118	112	88	79	83.5	119	88	103.5	119	114	116.5
DREB26	AT1G21910	AT1G21910	21	245	3	NA	NA	protein_coding	AP2 domain-containing transcription factor family protein	encodes a member of the DREB subfamily A-5 of ERF/AP2 transcription factor family. The protein contains one AP2 domain. There are 15 members in this subfamily including RAP2.1, RAP2.9 and RAP2.10.	AP2 domain-containing transcription factor family protein; FUNCTIONS IN: transcription factor activity, DNA binding; INVOLVED IN: regulation of transcription, DNA-dependent; LOCATED IN: nucleus, chloroplast; EXPRESSED IN: 22 plant structures; EXPRESSED DURING: 13 growth stages; CONTAINS InterPro DOMAIN/s: DNA-binding, integrase-type (InterPro:IPR016177), Pathogenesis-related transcriptional facto…	GO:0005634 | GO:0009507	nucleus | chloroplast	Communication:501714663 | AnalysisReference:501730133	GO:0003677 | GO:0003700 | GO:0003700	DNA binding | transcription factor activity | transcription factor activity	Communication:501714663 | Communication:501714663 | Publication:1345963|PMID:11118137	GO:0006355 | GO:0006355	regulation of transcription, DNA-dependent | "regulation of transcription, DNA-dependent"	Communication:501714663 | AnalysisReference:501730468	DREB26	1164	58	65	61.5	472	327	399.5	320	350	335	238	364	301	175	222	198.5	194	249	221.5	325	354	339.5	526	271	398.5	50	47	48.5
UGT73C1	AT2G36750	AT2G36750	21	93	1	AT2G36750	1	protein_coding	UGT73C1 (UDP-GLUCOSYL TRANSFERASE 73C1); UDP-glucosyltransferase/ UDP-glycosyltransferase/ cis-zeatin O-beta-D-glucosyltransferase/ trans-zeatin O-beta-D-glucosyltransferase/ transferase, transferring glycosyl groups	---	UDP-GLUCOSYL TRANSFERASE 73C1 (UGT73C1); FUNCTIONS IN: cis-zeatin O-beta-D-glucosyltransferase activity, UDP-glycosyltransferase activity, UDP-glucosyltransferase activity, transferase activity, transferring glycosyl groups, trans-zeatin O-beta-D-glucosyltransferase activity; INVOLVED IN: response to UV-B; EXPRESSED IN: stamen; EXPRESSED DURING: 4 anthesis, petal differentiation and expansion sta…	---	---	---	GO:0008194 | GO:0016757 | GO:0016757 | GO:0035251 | GO:0050403 | GO:0050502	UDP-glycosyltransferase activity | "transferase activity, transferring glycosyl groups" | "transferase activity, transferring glycosyl groups" | UDP-glucosyltransferase activity | trans-zeatin O-beta-D-glucosyltransferase activity | cis-zeatin O-beta-D-glucosyltransferase activity	Communication:501714663 | Communication:1674999 | Communication:1674999 | Publication:501727499|PMID:18702669 | Publication:501713278|PMID:15342621 | Publication:501713278|PMID:15342621	GO:0010224	response to UV-B	Publication:501724159|PMID:18266923	UGT73C1	1577	668	764	716	470	386	428	309	275	292	307	356	331.5	295	386	340.5	199	268	233.5	627	653	640	332	275	303.5	564	757	660.5
WRKY45	AT3G01970	AT3G01970	21	304	1	NA	NA	protein_coding	WRKY45; transcription factor	member of WRKY Transcription Factor; Group I	WRKY45; FUNCTIONS IN: transcription factor activity; INVOLVED IN: regulation of transcription, DNA-dependent; LOCATED IN: nucleus; EXPRESSED IN: 6 plant structures; EXPRESSED DURING: 4 anthesis, LP.04 four leaves visible, petal differentiation and expansion stage; CONTAINS InterPro DOMAIN/s: DNA-binding WRKY (InterPro:IPR003657); BEST Arabidopsis thaliana protein match is: WRKY75; transcription f…	GO:0005634	nucleus	AnalysisReference:501730468	GO:0003700 | GO:0003700 | GO:0003700 | GO:0003700	transcription factor activity | transcription factor activity | transcription factor activity | transcription factor activity	Publication:492|PMID:10785665 | Communication:1674991 | Publication:1345963|PMID:11118137 | Publication:492|PMID:10785665	GO:0006355	regulation of transcription, DNA-dependent	Publication:492|PMID:10785665	WRKY45	914	117	124	120.5	97	87	92	47	36	41.5	45	59	52	25	30	27.5	13	29	21	104	92	98	72	43	57.5	81	98	89.5
COL2	AT3G02380	AT3G02380	21	113	1	AT3G02380	1	protein_coding	COL2 (constans-like 2); transcription factor/ zinc ion binding	homologous to the flowering-time gene CONSTANS (CO) encoding zinc-finger proteins	constans-like 2 (COL2); FUNCTIONS IN: transcription factor activity, zinc ion binding; INVOLVED IN: regulation of flower development; LOCATED IN: intracellular; EXPRESSED IN: 20 plant structures; EXPRESSED DURING: 13 growth stages; CONTAINS InterPro DOMAIN/s: CCT domain (InterPro:IPR010402), Zinc finger, B-box (InterPro:IPR000315); BEST Arabidopsis thaliana protein match is: CO (CONSTANS); transc…	GO:0005622	intracellular	AnalysisReference:501730468	GO:0003700 | GO:0003700 | GO:0008270	transcription factor activity | transcription factor activity | zinc ion binding	Publication:501680195|PMID:11359606 | Publication:1345963|PMID:11118137 | Communication:501714663	GO:0009909	regulation of flower development	Publication:501680195|PMID:11359606	COL2	1315	3928	4739	4333.5	5193	4386	4789.5	11164	10355	10759.5	4026	4822	4424	4215	4871	4543	895	982	938.5	3916	4869	4392.5	4717	3971	4344	4613	5462	5037.5
MYB77	AT3G50060	AT3G50060	21	317	2	NA	NA	protein_coding	MYB77; DNA binding / transcription factor	Encodes a member of the R2R3 transcription factor gene family. Expressed in response to potassium deprivation and auxin. Involved in lateral root development. Interacts with ARF7 and regulates the expression of some auxin responsive genes.	MYB77; FUNCTIONS IN: transcription factor activity, DNA binding; INVOLVED IN: in 10 processes; EXPRESSED IN: 27 plant structures; EXPRESSED DURING: 13 growth stages; CONTAINS InterPro DOMAIN/s: SANT, DNA-binding (InterPro:IPR001005), Homeodomain-like (InterPro:IPR009057), Myb, DNA-binding (InterPro:IPR014778), Myb-type HTH DNA-binding domain (InterPro:IPR017930), Homeodomain-related (InterPro:IPR…	---	---	---	GO:0003677 | GO:0003700	DNA binding | transcription factor activity	Communication:501714663 | Publication:1345963|PMID:11118137	GO:0006355 | GO:0009651 | GO:0009723 | GO:0009737 | GO:0009739 | GO:0009751 | GO:0009753 | GO:0010200 | GO:0046686 | GO:0048527	regulation of transcription, DNA-dependent | response to salt stress | response to ethylene stimulus | response to abscisic acid stimulus | response to gibberellin stimulus | response to salicylic acid stimulus | response to jasmonic acid stimulus | response to chitin | response to cadmium ion | lateral root development	Publication:1979|PMID:9839469 | Publication:501718564|PMID:16463103 | Publication:501718564|PMID:16463103 | Publication:501718564|PMID:16463103 | Publication:501718564|PMID:16463103 | Publication:501718564|PMID:16463103 | Publication:501718564|PMID:16463103 | Publication:501722879|PMID:17722694 | Publication:501718564|PMID:16463103 | Publication:501723001|PMID:17675404	MYB77	1137	122	101	111.5	712	811	761.5	626	674	650	348	526	437	313	519	416	286	402	344	415	529	472	564	342	453	169	144	156.5
FIB	AT4G04020	AT4G04020	21	1884	1	NA	NA	protein_coding	FIB (FIBRILLIN); structural molecule	Fibrillin precursor protein. The fibrillin preprotein, but not the mature protein interacts with ABI2. Regulated by abscisic acid response regulators. Involved in abscisic acid-mediated photoprotection.	FIBRILLIN (FIB); FUNCTIONS IN: structural molecule activity; INVOLVED IN: photoinhibition, response to cold, response to abscisic acid stimulus; LOCATED IN: in 8 components; EXPRESSED IN: fruit, guard cell, leaf; EXPRESSED DURING: seedling growth; CONTAINS InterPro DOMAIN/s: PAP fibrillin (InterPro:IPR006843); BEST Arabidopsis thaliana protein match is: plastid-lipid associated protein PAP, putat…	GO:0005634 | GO:0009507 | GO:0009507 | GO:0009535 | GO:0009535 | GO:0009570 | GO:0009579 | GO:0009579 | GO:0009579 | GO:0010287 | GO:0010287 | GO:0010319 | GO:0031977	nucleus | chloroplast | chloroplast | chloroplast thylakoid membrane | chloroplast thylakoid membrane | chloroplast stroma | thylakoid | thylakoid | thylakoid | plastoglobule | plastoglobule | stromule | thylakoid lumen	Publication:501711432|PMID:14617066 | Publication:501712079|PMID:15028209 | Publication:501724486|PMID:18431481 | Publication:501711788|PMID:14729914 | Publication:501713005|PMID:15322131 | Publication:501728638|PMID:16207701 | Publication:501681963|PMID:11826309 | Publication:501711788|PMID:14729914 | Publication:501719172|PMID:16648217 | Publication:501718389|PMID:16414959 | Publication:5017185…	GO:0005198 | GO:0005198	structural molecule activity | structural molecule activity	Communication:501714663 | AnalysisReference:501730468	GO:0009409 | GO:0009737 | GO:0010205	response to cold | response to abscisic acid stimulus | photoinhibition	Publication:501719694|PMID:16923014 | Publication:501718644|PMID:16571665 | Publication:501718644|PMID:16571665	FIB	1378	4289	5265	4777	9607	8487	9047	1738	1620	1679	6264	9837	8050.5	5660	7923	6791.5	2294	4228	3261	8228	6664	7446	10935	9185	10060	4438	4988	4713
KCS19	AT5G04530	AT5G04530	21	177	1	AT5G04530	1	protein_coding	KCS19 (3-KETOACYL-COA SYNTHASE 19); acyltransferase/ catalytic/ transferase, transferring acyl groups other than amino-acyl groups	Encodes KCS19, a member of the 3-ketoacyl-CoA synthase family involved in the biosynthesis of VLCFA (very long chain fatty acids).	3-KETOACYL-COA SYNTHASE 19 (KCS19); FUNCTIONS IN: transferase activity, transferring acyl groups other than amino-acyl groups, catalytic activity, acyltransferase activity; INVOLVED IN: response to light stimulus, response to cold, response to osmotic stress; LOCATED IN: endomembrane system, membrane; EXPRESSED IN: 17 plant structures; EXPRESSED DURING: 12 growth stages; CONTAINS InterPro DOMAIN/…	GO:0012505 | GO:0016020	endomembrane system | membrane	AnalysisReference:501730133 | AnalysisReference:501730468	GO:0003824 | GO:0008415 | GO:0008415 | GO:0016747	catalytic activity | acyltransferase activity | acyltransferase activity | "transferase activity, transferring acyl groups other than amino-acyl groups"	AnalysisReference:501730468 | Communication:501714663 | AnalysisReference:501730468 | AnalysisReference:501730468	GO:0009409 | GO:0009416	response to cold | response to light stimulus	Publication:501724806|PMID:18465198 | Publication:501724806|PMID:18465198	KCS19	1867	633	669	651	807	663	735	1905	1772	1838.5	822	900	861	1351	1170	1260.5	1411	1731	1571	853	936	894.5	1018	956	987	553	576	564.5
AT5G05090	AT5G05090	AT5G05090	21	354	1	NA	NA	protein_coding	myb family transcription factor	---	myb family transcription factor; FUNCTIONS IN: transcription factor activity, DNA binding; INVOLVED IN: regulation of transcription; EXPRESSED IN: 21 plant structures; EXPRESSED DURING: 11 growth stages; CONTAINS InterPro DOMAIN/s: Homeodomain-like (InterPro:IPR009057), Myb, DNA-binding (InterPro:IPR014778), Myb-type HTH DNA-binding domain (InterPro:IPR017930), Myb-like DNA-binding region, SHAQKY…	---	---	---	GO:0003677 | GO:0003700	DNA binding | transcription factor activity	Communication:501714663 | Publication:1345963|PMID:11118137	GO:0045449	regulation of transcription	Publication:1345963|PMID:11118137	AT5G05090	1263	10	21	15.5	17	19	18	28	50	39	55	55	55	117	158	137.5	250	353	301.5	30	31	30.5	61	39	50	25	27	26
DWF3	AT5G05690	AT5G05690	21	497	2	NA	NA	protein_coding	CPD (CONSTITUTIVE PHOTOMORPHOGENIC DWARF); electron carrier/ heme binding / iron ion binding / monooxygenase/ oxygen binding	Encodes a member of the CP90A family, a cytochrome P450 monooxygenase which converts 6-deoxocathasterone to 6-deoxoteasterone in the late C6 oxidation pathway and cathasterone to teasterone in the early C6 oxidation pathway of brassinolide biosynthesis. Expressed in cotyledons and leaves. Mutants display de-etiolation and derepression of light-induced genes in the dark, dwarfism, male sterility a…	CONSTITUTIVE PHOTOMORPHOGENIC DWARF (CPD); FUNCTIONS IN: electron carrier activity, monooxygenase activity, iron ion binding, oxygen binding, heme binding; INVOLVED IN: in 7 processes; EXPRESSED IN: 23 plant structures; EXPRESSED DURING: 13 growth stages; CONTAINS InterPro DOMAIN/s: Cytochrome P450 (InterPro:IPR001128), Cytochrome P450, C-terminal region (InterPro:IPR017973), Cytochrome P450, con…	---	---	---	GO:0004497 | GO:0004497 | GO:0004497 | GO:0005506 | GO:0005506 | GO:0005506 | GO:0009055 | GO:0009055 | GO:0019825 | GO:0020037 | GO:0020037 | GO:0020037	monooxygenase activity | monooxygenase activity | monooxygenase activity | iron ion binding | iron ion binding | iron ion binding | electron carrier activity | electron carrier activity | oxygen binding | heme binding | heme binding | heme binding	AnalysisReference:501730468 | AnalysisReference:501730468 | AnalysisReference:501730468 | AnalysisReference:501730468 | AnalysisReference:501730468 | AnalysisReference:501730468 | AnalysisReference:501730468 | AnalysisReference:501730468 | Communication:501714663 | AnalysisReference:501730468 | AnalysisReference:501730468 | AnalysisReference:501730468	GO:0009826 | GO:0009911 | GO:0010224 | GO:0010268 | GO:0016132	unidimensional cell growth | positive regulation of flower development | response to UV-B | brassinosteroid homeostasis | brassinosteroid biosynthetic process	Publication:501675225 | Publication:501722791|PMID:17611230 | Publication:501714274|PMID:15474373 | Publication:501716542|PMID:15908602 | Publication:3931|PMID:8612270	DWF3	1720	1939	2400	2169.5	1855	1562	1708.5	4840	4766	4803	1746	2114	1930	3028	3292	3160	2821	3971	3396	2271	2607	2439	1612	1376	1494	2903	3289	3096
RVE7	AT1G18330	AT1G18330	20	1253	1	NA	NA	protein_coding	EPR1 (EARLY-PHYTOCHROME-RESPONSIVE1); DNA binding / transcription factor	EARLY-PHYTOCHROME-RESPONSIVE1	EARLY-PHYTOCHROME-RESPONSIVE1 (EPR1); FUNCTIONS IN: transcription factor activity, DNA binding; INVOLVED IN: response to cadmium ion, response to ethylene stimulus, response to salt stress, regulation of transcription; EXPRESSED IN: 22 plant structures; EXPRESSED DURING: 13 growth stages; CONTAINS InterPro DOMAIN/s: SANT, DNA-binding (InterPro:IPR001005), Homeodomain-like (InterPro:IPR009057), My…	---	---	---	GO:0003677 | GO:0003700	DNA binding | transcription factor activity	Communication:501714663 | Publication:1345963|PMID:11118137	GO:0009651 | GO:0009723 | GO:0045449 | GO:0046686	response to salt stress | response to ethylene stimulus | regulation of transcription | response to cadmium ion	Publication:501718564|PMID:16463103 | Publication:501718564|PMID:16463103 | Publication:1345963|PMID:11118137 | Publication:501718564|PMID:16463103	RVE7	1644	519	622	570.5	306	214	260	169	140	154.5	340	388	364	629	775	702	890	1175	1032.5	854	571	712.5	427	330	378.5	450	481	465.5
GI	AT1G22770	AT1G22770	20	16	1	AT1G22770	1	protein_coding	GI (GIGANTEA)	Together with CONSTANTS (CO) and FLOWERING LOCUS T (FT), GIGANTEA promotes flowering under long days in a circadian clock-controlled flowering pathway. GI acts earlier than CO and FT in the pathway by increasing CO and FT mRNA abundance. Located in the nucleus. Regulates several developmental processes, including photoperiod-mediated flowering, phytochrome B signaling, circadian clock, carbohydra…	GIGANTEA (GI); INVOLVED IN: in 10 processes; LOCATED IN: nucleoplasm, nucleus; EXPRESSED IN: 23 plant structures; EXPRESSED DURING: 13 growth stages; Has 189 Blast hits to 188 proteins in 27 species: Archae - 0; Bacteria - 0; Metazoa - 0; Fungi - 0; Plants - 189; Viruses - 0; Other Eukaryotes - 0 (source: NCBI BLink).	GO:0005634 | GO:0005654	nucleus | nucleoplasm	Publication:501717326|PMID:16006578 | Publication:199|PMID:10920210	---	---	---	GO:0007623 | GO:0009409 | GO:0009637 | GO:0009908 | GO:0010218 | GO:0010378 | GO:0042542 | GO:0042752 | GO:0045449 | GO:0048578	circadian rhythm | response to cold | response to blue light | flower development | response to far red light | temperature compensation of the circadian clock | response to hydrogen peroxide | regulation of circadian rhythm | regulation of transcription | "positive regulation of long-day photoperiodism, flowering"	Publication:501723160|PMID:17872410 | Publication:501717889|PMID:16231185 | Publication:501723160|PMID:17872410 | Publication:1616|PMID:10202817 | Publication:501728741|PMID:18790998 | Publication:501718919|PMID:16617099 | Publication:2308|PMID:9681039 | Publication:501717326|PMID:16006578 | Publication:501723160|PMID:17872410 | Publication:501717326|PMID:16006578	GI	4136	1464	1797	1630.5	912	910	911	422	539	480.5	855	1058	956.5	1324	1672	1498	3564	4941	4252.5	1221	1049	1135	745	586	665.5	1607	1759	1683
ARR11	AT1G67710	AT1G67710	20	259	1	NA	NA	protein_coding	ARR11 (RESPONSE REGULATOR 11); transcription factor/ two-component response regulator	Encodes an Arabidopsis response regulator (ARR) protein that acts in concert with other type-B ARRs in the cytokinin signaling pathway.	RESPONSE REGULATOR 11 (ARR11); FUNCTIONS IN: transcription factor activity, two-component response regulator activity; INVOLVED IN: cytokinin mediated signaling, response to cytokinin stimulus; EXPRESSED IN: 6 plant structures; EXPRESSED DURING: petal differentiation and expansion stage; CONTAINS InterPro DOMAIN/s: Response regulator, plant B-type (InterPro:IPR017053), Myb-like DNA-binding region…	---	---	---	GO:0000156 | GO:0000156 | GO:0000156 | GO:0000156 | GO:0003700 | GO:0003700	two-component response regulator activity | two-component response regulator activity | two-component response regulator activity | two-component response regulator activity | transcription factor activity | transcription factor activity	Communication:501714663 | Communication:1675000 | Communication:1675000 | Publication:501681565|PMID:12068096 | Publication:1345963|PMID:11118137 | Publication:501683622|PMID:12610214	GO:0009735 | GO:0009736	response to cytokinin stimulus | cytokinin mediated signaling	Publication:501717904|PMID:16227453 | Publication:501681565|PMID:12068096	ARR11	2048	11	17	14	18	13	15.5	35	37	36	19	36	27.5	70	72	71	91	146	118.5	10	20	15	26	15	20.5	14	17	15.5
PLA2-ALPHA	AT2G06925	AT2G06925	20	1025	2	NA	NA	protein_coding	PLA2-ALPHA; phospholipase A2	Encodes a secretory phospholipase A2 enzyme, which specifically hydrolyzes the sn-2 position of phospholipids. The enzyme has a preference towards linoleoyl acyl chain over palmitoyl acyl chain. It also has a slight preference for phosphatidylcholine over phosphatidylethanolamine.	PLA2-ALPHA; FUNCTIONS IN: phospholipase A2 activity; INVOLVED IN: phospholipid metabolic process, lipid catabolic process; LOCATED IN: vacuole; EXPRESSED IN: 23 plant structures; EXPRESSED DURING: 13 growth stages; CONTAINS InterPro DOMAIN/s: Phospholipase A2, active site (InterPro:IPR013090), Phospholipase A2 (InterPro:IPR016090), Phospholipase A2, eukaryotic (InterPro:IPR001211); BEST Arabidops…	GO:0005773	vacuole	Publication:501717695|PMID:16140037	GO:0004623 | GO:0004623 | GO:0004623	phospholipase A2 activity | phospholipase A2 activity | phospholipase A2 activity	Publication:501717695|PMID:16140037 | Publication:501719154|PMID:16669612 | Communication:501714663	GO:0006644 | GO:0016042	phospholipid metabolic process | lipid catabolic process	AnalysisReference:501730468 | AnalysisReference:501730468	PLA2-ALPHA	658	45	53	49	42	33	37.5	78	74	76	41	41	41	82	103	92.5	475	696	585.5	42	51	46.5	44	49	46.5	72	74	73
MYB70	AT2G23290	AT2G23290	20	281	2	NA	NA	protein_coding	AtMYB70 (myb domain protein 70); DNA binding / transcription factor	Member of the R2R3 factor gene family.	myb domain protein 70 (AtMYB70); FUNCTIONS IN: transcription factor activity, DNA binding; INVOLVED IN: response to cadmium ion, response to salt stress, regulation of transcription, DNA-dependent; EXPRESSED IN: 24 plant structures; EXPRESSED DURING: 13 growth stages; CONTAINS InterPro DOMAIN/s: SANT, DNA-binding (InterPro:IPR001005), Homeodomain-like (InterPro:IPR009057), Myb, DNA-binding (Inter…	---	---	---	GO:0003677 | GO:0003700 | GO:0003700	DNA binding | transcription factor activity | transcription factor activity	Communication:501714663 | Communication:501714663 | Publication:1345963|PMID:11118137	GO:0006355 | GO:0009651 | GO:0046686	regulation of transcription, DNA-dependent | response to salt stress | response to cadmium ion	Publication:1979|PMID:9839469 | Publication:501718564|PMID:16463103 | Publication:501718564|PMID:16463103	MYB70	1134	297	314	305.5	663	545	604	878	838	858	497	694	595.5	503	681	592	450	688	569	700	884	792	546	463	504.5	297	374	335.5
EXP3	AT2G37640	AT2G37640	20	107	1	AT2G37640	1	protein_coding	EXP3	member of Alpha-Expansin Gene Family. Naming convention from the Expansin Working Group (Kende et al, 2004. Plant Mol Bio). Involved in the formation of nematode-induced syncytia in roots of Arabidopsis thaliana.	EXP3; INVOLVED IN: in 6 processes; LOCATED IN: endomembrane system, extracellular region; EXPRESSED IN: 21 plant structures; EXPRESSED DURING: 13 growth stages; CONTAINS InterPro DOMAIN/s: Barwin-related endoglucanase (InterPro:IPR009009), Pollen allergen, N-terminal (InterPro:IPR014734), Expansin (InterPro:IPR002963), Rare lipoprotein A (InterPro:IPR005132), Expansin/Lol pI (InterPro:IPR007118),…	GO:0005576 | GO:0012505	extracellular region | endomembrane system	AnalysisReference:501730468 | AnalysisReference:501730133	---	---	---	GO:0006949 | GO:0009739 | GO:0009826 | GO:0009826 | GO:0009828 | GO:0009828 | GO:0009831 | GO:0010114	syncytium formation | response to gibberellin stimulus | unidimensional cell growth | unidimensional cell growth | plant-type cell wall loosening | plant-type cell wall loosening | plant-type cell wall modification during multidimensional cell growth | response to red light	Publication:501719626|PMID:16942607 | Publication:501721355|PMID:17449805 | Communication:501714663 | Publication:1546271|PMID:11641069 | Communication:501714663 | Publication:1546271|PMID:11641069 | Communication:501714663 | Publication:501721355|PMID:17449805	EXP3	1202	553	643	598	556	522	539	993	969	981	422	443	432.5	556	597	576.5	633	805	719	517	526	521.5	600	482	541	690	748	719
AT2G40200	AT2G40200	AT2G40200	20	293	1	NA	NA	protein_coding	basic helix-loop-helix (bHLH) family protein	---	basic helix-loop-helix (bHLH) family protein; FUNCTIONS IN: transcription factor activity, DNA binding; INVOLVED IN: regulation of transcription; LOCATED IN: nucleus; EXPRESSED IN: 21 plant structures; EXPRESSED DURING: 13 growth stages; CONTAINS InterPro DOMAIN/s: Basic helix-loop-helix dimerisation region bHLH (InterPro:IPR001092), Helix-loop-helix DNA-binding (InterPro:IPR011598); BEST Arabido…	GO:0005634	nucleus	AnalysisReference:501730468	GO:0003677 | GO:0003700 | GO:0003700	DNA binding | transcription factor activity | transcription factor activity	Communication:501714663 | Publication:1345963|PMID:11118137 | Publication:501705886|PMID:12679534	GO:0045449	regulation of transcription	Publication:1345963|PMID:11118137	AT2G40200	828	50	57	53.5	21	18	19.5	77	100	88.5	14	16	15	15	11	13	9	10	9.5	15	16	15.5	17	12	14.5	56	46	51
MYBC1	AT2G40970	AT2G40970	20	294	3	NA	NA	protein_coding	myb family transcription factor	---	myb family transcription factor; FUNCTIONS IN: transcription factor activity, DNA binding; INVOLVED IN: regulation of transcription; EXPRESSED IN: 18 plant structures; EXPRESSED DURING: 8 growth stages; CONTAINS InterPro DOMAIN/s: Homeodomain-like (InterPro:IPR009057), Myb, DNA-binding (InterPro:IPR014778), Myb-type HTH DNA-binding domain (InterPro:IPR017930), Myb-like DNA-binding region, SHAQKYF…	---	---	---	GO:0003677 | GO:0003700 | GO:0003700	DNA binding | transcription factor activity | transcription factor activity	Communication:501714663 | Publication:1345963|PMID:11118137 | Publication:1345963|PMID:11118137	GO:0045449	regulation of transcription	Publication:1345963|PMID:11118137	MYBC1	1146	52	59	55.5	74	75	74.5	103	108	105.5	54	72	63	86	99	92.5	91	113	102	53	59	56	99	67	83	50	81	65.5
AT2G42150	AT2G42150	AT2G42150	20	295	1	NA	NA	protein_coding	DNA-binding bromodomain-containing protein	---	DNA-binding bromodomain-containing protein; FUNCTIONS IN: DNA binding; LOCATED IN: nucleus; EXPRESSED IN: 12 plant structures; EXPRESSED DURING: LP.04 four leaves visible, F mature embryo stage, petal differentiation and expansion stage, D bilateral stage, E expanded cotyledon stage; CONTAINS InterPro DOMAIN/s: SANT, DNA-binding (InterPro:IPR001005), Myb, DNA-binding (InterPro:IPR014778), Bromodo…	GO:0005634	nucleus	Communication:501714663	GO:0003677 | GO:0003677	DNA binding | DNA binding	Communication:501714663 | AnalysisReference:501730468	---	---	---	AT2G42150	2105	145	191	168	93	75	84	105	118	111.5	69	89	79	62	70	66	23	29	26	122	127	124.5	79	64	71.5	157	207	182
SWEET17	AT4G15920	AT4G15920	20	152	4	AT4G15920	4	protein_coding	---	---	INVOLVED IN: biological_process unknown; LOCATED IN: endomembrane system, integral to membrane, membrane; EXPRESSED IN: 23 plant structures; EXPRESSED DURING: 13 growth stages; CONTAINS InterPro DOMAIN/s: MtN3 and saliva related transmembrane protein, conserved region (InterPro:IPR018169), RAG1-activating protein 1 homologue (InterPro:IPR018179), MtN3 and saliva related transmembrane protein (Int…	GO:0012505 | GO:0016020 | GO:0016021	endomembrane system | membrane | integral to membrane	AnalysisReference:501730133 | Communication:501714663 | AnalysisReference:501730468	---	---	---	GO:0008150	biological_process	Communication:1345790	SWEET17	1003	136	140	138	328	322	325	158	163	160.5	419	546	482.5	504	525	514.5	427	632	529.5	115	180	147.5	134	118	126	183	212	197.5
AT5G07580	AT5G07580	AT5G07580	20	356	1	NA	NA	protein_coding	DNA binding / transcription factor	encodes a member of the ERF (ethylene response factor) subfamily B-3 of ERF/AP2 transcription factor family. The protein contains one AP2 domain. There are 18 members in this subfamily including ATERF-1, ATERF-2, AND ATERF-5.	DNA binding / transcription factor; FUNCTIONS IN: transcription factor activity, DNA binding; INVOLVED IN: ethylene mediated signaling pathway, regulation of transcription, DNA-dependent; LOCATED IN: nucleus; EXPRESSED IN: 22 plant structures; EXPRESSED DURING: 13 growth stages; CONTAINS InterPro DOMAIN/s: DNA-binding, integrase-type (InterPro:IPR016177), Pathogenesis-related transcriptional fact…	GO:0005634	nucleus	Communication:501714663	GO:0003677 | GO:0003700 | GO:0003700 | GO:0003700	DNA binding | transcription factor activity | transcription factor activity | transcription factor activity	Communication:501714663 | Communication:501714663 | Publication:2298|PMID:9687012 | Publication:1345963|PMID:11118137	GO:0006355 | GO:0009873	regulation of transcription, DNA-dependent | ethylene mediated signaling pathway	Communication:501714663 | Publication:2298|PMID:9687012	AT5G07580	1098	554	574	564	981	926	953.5	600	586	593	724	1011	867.5	946	1109	1027.5	1159	1610	1384.5	729	771	750	511	421	466	529	568	548.5
PHL1	AT5G29000	AT5G29000	20	368	1	NA	NA	protein_coding	myb family transcription factor	---	myb family transcription factor; FUNCTIONS IN: transcription factor activity, DNA binding; INVOLVED IN: regulation of transcription; LOCATED IN: nucleus; EXPRESSED IN: 16 plant structures; EXPRESSED DURING: 9 growth stages; CONTAINS InterPro DOMAIN/s: Homeodomain-like (InterPro:IPR009057), Myb, DNA-binding (InterPro:IPR014778), Myb-like DNA-binding region, SHAQKYF class (InterPro:IPR006447), Myb-…	GO:0005634 | GO:0009507	nucleus | chloroplast	Communication:501714663 | AnalysisReference:501730133	GO:0003677 | GO:0003700	DNA binding | transcription factor activity	Communication:501714663 | Publication:1345963|PMID:11118137	GO:0045449	regulation of transcription	AnalysisReference:501730468	PHL1	1989	116	153	134.5	138	121	129.5	415	367	391	144	159	151.5	144	156	150	103	156	129.5	87	97	92	93	80	86.5	167	187	177
NUC	AT5G44160	AT5G44160	20	373	1	NA	NA	protein_coding	NUC (nutcracker); nucleic acid binding / transcription factor/ zinc ion binding	---	nutcracker (NUC); FUNCTIONS IN: transcription factor activity, zinc ion binding, nucleic acid binding; INVOLVED IN: regulation of transcription; LOCATED IN: intracellular; EXPRESSED IN: primary root apical meristem, stem vascular system, embryo, root, embryonic root; CONTAINS InterPro DOMAIN/s: Zinc finger, C2H2-like (InterPro:IPR015880), Zinc finger, C2H2-type (InterPro:IPR007087); BEST Arabidop…	GO:0005622	intracellular	AnalysisReference:501730468	GO:0003676 | GO:0003700 | GO:0008270	nucleic acid binding | transcription factor activity | zinc ion binding	Communication:501714663 | Publication:1345963|PMID:11118137 | Communication:501714663	GO:0045449	regulation of transcription	Publication:1345963|PMID:11118137	NUC	1724	33	29	31	38	27	32.5	30	32	31	46	40	43	46	56	51	36	48	42	35	35	35	5	11	8	40	54	47
AT5G51190	AT5G51190	AT5G51190	20	380	1	NA	NA	protein_coding	AP2 domain-containing transcription factor, putative	encodes a member of the ERF (ethylene response factor) subfamily B-3 of ERF/AP2 transcription factor family. The protein contains one AP2 domain. There are 18 members in this subfamily including ATERF-1, ATERF-2, AND ATERF-5.	AP2 domain-containing transcription factor, putative; FUNCTIONS IN: transcription factor activity, DNA binding; INVOLVED IN: response to chitin, regulation of transcription, DNA-dependent; LOCATED IN: nucleus; EXPRESSED IN: 20 plant structures; EXPRESSED DURING: 11 growth stages; CONTAINS InterPro DOMAIN/s: DNA-binding, integrase-type (InterPro:IPR016177), Pathogenesis-related transcriptional fac…	GO:0005634	nucleus	Communication:501714663	GO:0003677 | GO:0003700 | GO:0003700	DNA binding | transcription factor activity | transcription factor activity	Communication:501714663 | Communication:501714663 | Publication:1345963|PMID:11118137	GO:0006355 | GO:0010200	regulation of transcription, DNA-dependent | response to chitin	Communication:501714663 | Publication:501722879|PMID:17722694	AT5G51190	833	62	77	69.5	488	525	506.5	712	902	807	202	277	239.5	117	258	187.5	114	132	123	204	186	195	311	153	232	231	169	200
WOX2	AT5G59340	AT5G59340	20	385	1	NA	NA	protein_coding	WOX2 (WUSCHEL RELATED HOMEOBOX 2); transcription factor	Encodes a WUSCHEL-related homeobox gene family member with 65 amino acids in its homeodomain. Proteins in this family contain a sequence of eight residues (TLPLFPMH) downstream of the homeodomain called the WUS box. WOX2 has a putative Zinc finger domain downstream of the homeodomain. Transcripts are expressed in the egg cell, the zygote and the apical cell lineage and are reduced in met3-1 early…	WUSCHEL RELATED HOMEOBOX 2 (WOX2); FUNCTIONS IN: transcription factor activity; INVOLVED IN: apical cell fate commitment, positive regulation of cell proliferation, cotyledon development, embryonic pattern specification, longitudinal axis specification; LOCATED IN: nucleus; EXPRESSED IN: 16 plant structures; EXPRESSED DURING: 8 growth stages; CONTAINS InterPro DOMAIN/s: Homeobox (InterPro:IPR0013…	GO:0005634	nucleus	AnalysisReference:501730468	GO:0003700	transcription factor activity	Publication:1345963|PMID:11118137	GO:0008284 | GO:0009880 | GO:0009942 | GO:0048825	positive regulation of cell proliferation | embryonic pattern specification | longitudinal axis specification | cotyledon development	Publication:501722919|PMID:17706632 | Publication:501711727|PMID:14711878 | Publication:501711727|PMID:14711878 | Publication:501722919|PMID:17706632	WOX2	850	23	22	22.5	51	40	45.5	113	98	105.5	53	47	50	42	47	44.5	16	22	19	27	43	35	43	32	37.5	30	32	31
PRR3	AT5G60100	AT5G60100	20	386	1	NA	NA	protein_coding	APRR3 (ARABIDOPSIS PSEUDO-RESPONSE REGULATOR 3); transcription regulator/ two-component response regulator	Encodes pseudo-response regulator 3 (APRR3/PRR3). PRR3 transcript levels vary in a circadian pattern with peak expression at dusk under long and short day conditions. PRR3 affects the period of the circadian clock and seedlings with reduced levels of PRR3 have shorter periods, based on transcriptional assays of clock-regulated genes. PRR3 is expressed in the vasculature of cotyledons and leaves w…	ARABIDOPSIS PSEUDO-RESPONSE REGULATOR 3 (APRR3); FUNCTIONS IN: transcription regulator activity, two-component response regulator activity; INVOLVED IN: negative regulation of protein binding, regulation of circadian rhythm, circadian rhythm, phosphorylation; EXPRESSED IN: 24 plant structures; EXPRESSED DURING: 13 growth stages; CONTAINS InterPro DOMAIN/s: CheY-like (InterPro:IPR011006), Signal t…	---	---	---	GO:0000156 | GO:0030528	two-component response regulator activity | transcription regulator activity	Communication:1675000 | Publication:501681565|PMID:12068096	GO:0007623 | GO:0016310 | GO:0032091 | GO:0042752	circadian rhythm | phosphorylation | negative regulation of protein binding | regulation of circadian rhythm	Publication:501683132|PMID:11100772 | Publication:501681499|PMID:12091722 | Publication:501723828|PMID:18055606 | Publication:501683132|PMID:11100772	PRR3	2222	12	11	11.5	14	7	10.5	22	19	20.5	5	6	5.5	11	13	12	109	151	130	16	12	14	10	2	6	16	17	16.5
ERF104	AT5G61600	AT5G61600	20	389	1	NA	NA	protein_coding	ethylene-responsive element-binding family protein	encodes a member of the ERF (ethylene response factor) subfamily B-3 of ERF/AP2 transcription factor family. The protein contains one AP2 domain. There are 18 members in this subfamily including ATERF-1, ATERF-2, AND ATERF-5.	ethylene-responsive element-binding family protein; FUNCTIONS IN: transcription factor activity, DNA binding; INVOLVED IN: regulation of transcription, DNA-dependent; LOCATED IN: nucleus; EXPRESSED IN: 22 plant structures; EXPRESSED DURING: 13 growth stages; CONTAINS InterPro DOMAIN/s: DNA-binding, integrase-type (InterPro:IPR016177), Pathogenesis-related transcriptional factor and ERF, DNA-bindi…	GO:0005634	nucleus	Communication:501714663	GO:0003677 | GO:0003700 | GO:0003700 | GO:0016563	DNA binding | transcription factor activity | transcription factor activity | transcription activator activity	Communication:501714663 | Communication:501714663 | Publication:1345963|PMID:11118137 | Publication:501730437|PMID:19416906	GO:0006355 | GO:0050832	regulation of transcription, DNA-dependent | defense response to fungus	Communication:501714663 | Publication:501730437|PMID:19416906	ERF104	1045	70	113	91.5	560	655	607.5	1210	1410	1310	207	305	256	173	301	237	285	359	322	240	236	238	314	179	246.5	348	218	283
SHY2	AT1G04240	AT1G04240	19	233	1	NA	NA	protein_coding	SHY2 (SHORT HYPOCOTYL 2); transcription factor	SHY2/IAA3 regulates multiple auxin responses in roots. It is induced rapidly by IAA, and has been shown to be phosphorylated by oat phytochrome A in vitro.	SHORT HYPOCOTYL 2 (SHY2); FUNCTIONS IN: transcription factor activity; INVOLVED IN: response to cyclopentenone, response to auxin stimulus, response to brassinosteroid stimulus; LOCATED IN: nucleus; EXPRESSED IN: 22 plant structures; EXPRESSED DURING: 13 growth stages; CONTAINS InterPro DOMAIN/s: Aux/IAA-ARF-dimerisation (InterPro:IPR011525), AUX/IAA protein (InterPro:IPR003311); BEST Arabidopsis…	GO:0005634	nucleus	AnalysisReference:501730468	GO:0003700	transcription factor activity	Publication:1345963|PMID:11118137	GO:0009733 | GO:0010583	response to auxin stimulus | response to cyclopentenone	Publication:1547266|PMID:11884676 | Publication:501724352|PMID:18334669	SHY2	1178	993	1014	1003.5	1956	1538	1747	2171	2014	2092.5	1017	1315	1166	1014	1362	1188	709	1077	893	3423	3770	3596.5	1817	1480	1648.5	1967	2362	2164.5
RGA2	AT1G14920	AT1G14920	19	12	3	AT1G14920	3	protein_coding	GAI (GIBBERELLIC ACID INSENSITIVE); transcription factor	Similar to a putative transcription factor and transcriptional coactivators. Repressor of GA responses and involved in gibberellic acid mediated signaling. Member of the DELLA proteins that restrain the cell proliferation and expansion that drives plant growth. The protein undergoes degradation in response to GA via the 26S proteasome. GAI may be involved in reducing ROS accumulation in response …	GIBBERELLIC ACID INSENSITIVE (GAI); FUNCTIONS IN: transcription factor activity; INVOLVED IN: in 16 processes; LOCATED IN: nucleus; EXPRESSED IN: 22 plant structures; EXPRESSED DURING: 13 growth stages; CONTAINS InterPro DOMAIN/s: GRAS transcription factor (InterPro:IPR005202); BEST Arabidopsis thaliana protein match is: RGA1 (REPRESSOR OF GA1-3 1); protein binding / transcription factor (TAIR:AT…	GO:0005634 | GO:0005634 | GO:0005634	nucleus | nucleus | nucleus	Publication:1308|PMID:10421366 | Publication:501682844|PMID:12492836 | Publication:670|PMID:10713441	GO:0003700 | GO:0003700 | GO:0003700 | GO:0003700	transcription factor activity | transcription factor activity | transcription factor activity | transcription factor activity	Publication:1308|PMID:10421366 | Publication:1345963|PMID:11118137 | Publication:3190|PMID:9237632 | Publication:501680596|PMID:11487693	GO:0006808 | GO:0009651 | GO:0009723 | GO:0009737 | GO:0009739 | GO:0009740 | GO:0009845 | GO:0009863 | GO:0009867 | GO:0009938 | GO:0009938 | GO:0010162 | GO:0010187 | GO:0010218 | GO:0010233 | GO:0042538	regulation of nitrogen utilization | response to salt stress | response to ethylene stimulus | response to abscisic acid stimulus | response to gibberellin stimulus | gibberellic acid mediated signaling | seed germination | salicylic acid mediated signaling pathway | jasmonic acid mediated signaling pathway | negative regulation of gibberellic acid mediated signaling | negative regulation of gibb…	Publication:3190|PMID:9237632 | Publication:501718439|PMID:16400150 | Publication:501718439|PMID:16400150 | Publication:501718439|PMID:16400150 | Publication:501721172|PMID:17333251 | Publication:1308|PMID:10421366 | Publication:501720263|PMID:17141619 | Publication:501724828|PMID:18450451 | Publication:501724828|PMID:18450451 | Publication:501721454|PMID:17416730 | Publication:1547249|PMID:11925…	RGA2	2129	522	672	597	753	632	692.5	2071	2181	2126	735	905	820	826	846	836	757	969	863	1378	1602	1490	1366	1220	1293	1699	1951	1825
AT1G25550	AT1G25550	AT1G25550	19	248	2	NA	NA	protein_coding	myb family transcription factor	---	myb family transcription factor; FUNCTIONS IN: transcription factor activity, DNA binding; INVOLVED IN: regulation of transcription; EXPRESSED IN: 23 plant structures; EXPRESSED DURING: 13 growth stages; CONTAINS InterPro DOMAIN/s: Homeodomain-like (InterPro:IPR009057), Myb, DNA-binding (InterPro:IPR014778), Myb-type HTH DNA-binding domain (InterPro:IPR017930), Myb-like DNA-binding region, SHAQKY…	---	---	---	GO:0003677 | GO:0003700	DNA binding | transcription factor activity	Publication:1345963|PMID:11118137 | Publication:1345963|PMID:11118137	GO:0045449	regulation of transcription	Publication:1345963|PMID:11118137	AT1G25550	1396	467	437	452	1571	1322	1446.5	1486	1361	1423.5	838	1345	1091.5	1234	1553	1393.5	1433	2353	1893	1009	1188	1098.5	797	604	700.5	451	615	533
AT1G66180	AT1G66180	AT1G66180	19	56	3	AT1G66180	3	protein_coding	aspartyl protease family protein	---	aspartyl protease family protein; FUNCTIONS IN: aspartic-type endopeptidase activity; INVOLVED IN: proteolysis; LOCATED IN: endomembrane system; EXPRESSED IN: 22 plant structures; EXPRESSED DURING: 13 growth stages; CONTAINS InterPro DOMAIN/s: Peptidase aspartic, catalytic (InterPro:IPR009007), Peptidase A1 (InterPro:IPR001461); BEST Arabidopsis thaliana protein match is: aspartyl protease family…	GO:0012505	endomembrane system	AnalysisReference:501730133	---	---	---	GO:0006508 | GO:0006508	proteolysis | proteolysis	Communication:501714663 | AnalysisReference:501730468	AT1G66180	1626	457	571	514	1778	1358	1568	1577	1900	1738.5	1134	1722	1428	1053	1384	1218.5	1327	1884	1605.5	1191	1275	1233	1941	1481	1711	613	786	699.5
ERF6	AT4G17490	AT4G17490	19	153	1	AT4G17490	1	protein_coding	ATERF6 (ETHYLENE RESPONSIVE ELEMENT BINDING FACTOR 6); DNA binding / transcription factor	Encodes a member of the ERF (ethylene response factor) subfamily B-3 of ERF/AP2 transcription factor family (ATERF-6). The protein contains one AP2 domain. There are 18 members in this subfamily including ATERF-1, ATERF-2, AND ATERF-5.	ETHYLENE RESPONSIVE ELEMENT BINDING FACTOR 6 (ATERF6); FUNCTIONS IN: transcription factor activity, DNA binding; INVOLVED IN: ethylene mediated signaling pathway, response to chitin, regulation of transcription, DNA-dependent; LOCATED IN: nucleus; EXPRESSED IN: 18 plant structures; EXPRESSED DURING: 10 growth stages; CONTAINS InterPro DOMAIN/s: DNA-binding, integrase-type (InterPro:IPR016177), Pa…	GO:0005634	nucleus	Communication:501714663	GO:0003677 | GO:0003700 | GO:0003700 | GO:0003700	DNA binding | transcription factor activity | transcription factor activity | transcription factor activity	Communication:501714663 | Communication:501714663 | Publication:2298|PMID:9687012 | Publication:1345963|PMID:11118137	GO:0006355 | GO:0009873 | GO:0010200	regulation of transcription, DNA-dependent | ethylene mediated signaling pathway | response to chitin	Communication:501714663 | Publication:2298|PMID:9687012 | Publication:501722879|PMID:17722694	ERF6	1044	31	21	26	98	126	112	252	370	311	71	111	91	55	120	87.5	143	192	167.5	59	51	55	102	55	78.5	86	61	73.5
WRKY11	AT4G31550	AT4G31550	19	346	1	NA	NA	protein_coding	WRKY11; calmodulin binding / transcription factor	member of WRKY Transcription Factor; Group II-d; negative regulator of basal resistance to Pseudomonas syringae.	WRKY11; FUNCTIONS IN: transcription factor activity, calmodulin binding; INVOLVED IN: defense response to bacterium, response to chitin, regulation of transcription, DNA-dependent; LOCATED IN: nucleus; EXPRESSED IN: 23 plant structures; EXPRESSED DURING: 13 growth stages; CONTAINS InterPro DOMAIN/s: DNA-binding WRKY (InterPro:IPR003657), Transcription factor, WRKY, Zn-cluster (InterPro:IPR018872)…	GO:0005634	nucleus	Publication:492|PMID:10785665	GO:0003700 | GO:0003700 | GO:0003700 | GO:0003700 | GO:0003700 | GO:0005516	transcription factor activity | transcription factor activity | transcription factor activity | transcription factor activity | transcription factor activity | calmodulin binding	Publication:492|PMID:10785665 | Communication:1674991 | Communication:1674991 | Publication:1345963|PMID:11118137 | Publication:492|PMID:10785665 | Publication:501714937|PMID:15733871	GO:0006355 | GO:0010200 | GO:0042742	regulation of transcription, DNA-dependent | response to chitin | defense response to bacterium	Publication:492|PMID:10785665 | Publication:501722879|PMID:17722694 | Publication:501720332|PMID:17114354	WRKY11	1177	93	149	121	244	237	240.5	324	425	374.5	465	610	537.5	417	631	524	669	857	763	247	261	254	498	422	460	240	269	254.5
FAH12	AT4G36220	AT4G36220	19	170	1	AT4G36220	1	protein_coding	FAH1 (FERULIC ACID 5-HYDROXYLASE 1); ferulate 5-hydroxylase/ monooxygenase	encodes ferulate 5-hydroxylase (F5H). Involved in lignin biosynthesis.	FERULIC ACID 5-HYDROXYLASE 1 (FAH1); FUNCTIONS IN: ferulate 5-hydroxylase activity, monooxygenase activity; INVOLVED IN: response to UV-B, lignin biosynthetic process, phenylpropanoid biosynthetic process; LOCATED IN: endoplasmic reticulum; EXPRESSED IN: 20 plant structures; EXPRESSED DURING: 12 growth stages; CONTAINS InterPro DOMAIN/s: Cytochrome P450 (InterPro:IPR001128), Cytochrome P450, C-te…	GO:0005783	endoplasmic reticulum	Publication:501718909|PMID:16618929	GO:0004497 | GO:0046424	monooxygenase activity | ferulate 5-hydroxylase activity	Publication:1237|PMID:10468559 | Publication:3813|PMID:8692910	GO:0009699 | GO:0009699 | GO:0009809 | GO:0009809 | GO:0009809 | GO:0010224	phenylpropanoid biosynthetic process | phenylpropanoid biosynthetic process | lignin biosynthetic process | lignin biosynthetic process | lignin biosynthetic process | response to UV-B	Publication:3813|PMID:8692910 | Publication:501717753|PMID:16167893 | Publication:2515|PMID:9618461 | Publication:1882|PMID:9880351 | Publication:3813|PMID:8692910 | Publication:4160|PMID:8539286	FAH12	1819	5547	6539	6043	9447	8961	9204	2313	2527	2420	6066	8299	7182.5	7698	8524	8111	5719	6874	6296.5	7662	8256	7959	6930	5668	6299	6327	7335	6831
FRO6	AT5G49730	AT5G49730	19	205	1	AT5G49730	1	protein_coding	ATFRO6 (FERRIC REDUCTION OXIDASE 6); ferric-chelate reductase/ oxidoreductase	Encodes a plasma membrane-located ferric chelate reductase. Its mRNA is expressed in green aerial tissues (shoot, flower and cotyledon) in a light- and cell differentiation-specific manner.	FERRIC REDUCTION OXIDASE 6 (ATFRO6); FUNCTIONS IN: oxidoreductase activity, ferric-chelate reductase activity; INVOLVED IN: response to light stimulus; LOCATED IN: plasma membrane, membrane; EXPRESSED IN: shoot, cotyledon, flower; CONTAINS InterPro DOMAIN/s: Ferredoxin reductase-type FAD-binding domain (InterPro:IPR017927), Ferric reductase, NAD binding (InterPro:IPR013121), Cytochrome b245, heav…	GO:0005886 | GO:0016020	plasma membrane | membrane	Publication:501727270|PMID:18647837 | Communication:501714663	GO:0000293 | GO:0016491	ferric-chelate reductase activity | oxidoreductase activity	Publication:501727270|PMID:18647837 | Communication:501714663	GO:0009416	response to light stimulus	Publication:501718503|PMID:16489134	FRO6	2529	823	815	819	2078	1894	1986	1060	1130	1095	2028	3035	2531.5	3100	3953	3526.5	2550	3338	2944	1681	2439	2060	2629	2662	2645.5	727	840	783.5
ZAT10	AT1G27730	AT1G27730	18	18	1	AT1G27730	1	protein_coding	STZ (salt tolerance zinc finger); nucleic acid binding / transcription factor/ transcription repressor/ zinc ion binding	Related to Cys2/His2-type zinc-finger proteins found in higher plants. Compensated for a subset of calcineurin deficiency in yeast. Salt tolerance produced by ZAT10 appeared to be partially dependent on ENA1/PMR2, a P-type ATPase required for Li+ and Na+ efflux in yeast. The protein is localized to the nucleus, acts as a transcriptional repressor and is responsive to chitin oligomers. Also involv…	salt tolerance zinc finger (STZ); FUNCTIONS IN: transcription repressor activity, transcription factor activity, zinc ion binding, nucleic acid binding; INVOLVED IN: in 11 processes; LOCATED IN: nucleus; EXPRESSED IN: 22 plant structures; EXPRESSED DURING: 12 growth stages; CONTAINS InterPro DOMAIN/s: Zinc finger, C2H2-like (InterPro:IPR015880), Zinc finger, C2H2-type (InterPro:IPR007087); BEST A…	GO:0005634	nucleus	Publication:501712981|PMID:15333755	GO:0003676 | GO:0003700 | GO:0003700 | GO:0008270 | GO:0016564	nucleic acid binding | transcription factor activity | transcription factor activity | zinc ion binding | transcription repressor activity	Communication:501714663 | Publication:1345963|PMID:11118137 | Publication:3870|PMID:8662738 | Communication:501714663 | Publication:501712981|PMID:15333755	GO:0006979 | GO:0009409 | GO:0009414 | GO:0009414 | GO:0009611 | GO:0009644 | GO:0009651 | GO:0009651 | GO:0009737 | GO:0010117 | GO:0010200 | GO:0015979 | GO:0035264	response to oxidative stress | response to cold | response to water deprivation | response to water deprivation | response to wounding | response to high light intensity | response to salt stress | response to salt stress | response to abscisic acid stimulus | photoprotection | response to chitin | photosynthesis | multicellular organism growth	Publication:501723710|PMID:18156220 | Publication:501712981|PMID:15333755 | Publication:501712981|PMID:15333755 | Publication:501712981|PMID:15333755 | Publication:501717815|PMID:16258017 | Publication:501723710|PMID:18156220 | Publication:3870|PMID:8662738 | Publication:3870|PMID:8662738 | Publication:501712981|PMID:15333755 | Publication:501723710|PMID:18156220 | Publication:501716437|PMID:1592…	ZAT10	933	116	146	131	555	578	566.5	1358	2019	1688.5	247	348	297.5	169	263	216	121	174	147.5	371	234	302.5	517	239	378	470	302	386
MYB20	AT1G66230	AT1G66230	18	257	1	NA	NA	protein_coding	MYB20 (myb domain protein 20); DNA binding / transcription factor	Encodes a putative transcription factor (MYB20).	myb domain protein 20 (MYB20); FUNCTIONS IN: transcription factor activity, DNA binding; INVOLVED IN: regulation of transcription, DNA-dependent, regulation of secondary cell wall thickening; LOCATED IN: nucleus; EXPRESSED IN: 13 plant structures; EXPRESSED DURING: 8 growth stages; CONTAINS InterPro DOMAIN/s: SANT, DNA-binding (InterPro:IPR001005), Homeodomain-like (InterPro:IPR009057), Myb, DNA-…	GO:0005634	nucleus	Publication:501728868|PMID:18952777	GO:0003677 | GO:0003700 | GO:0003700	DNA binding | transcription factor activity | transcription factor activity	Publication:1979|PMID:9839469 | Publication:1979|PMID:9839469 | Publication:1345963|PMID:11118137	GO:0006355	regulation of transcription, DNA-dependent	Publication:1979|PMID:9839469	MYB20	1186	370	332	351	282	291	286.5	96	88	92	245	352	298.5	305	376	340.5	226	345	285.5	310	369	339.5	298	255	276.5	226	234	230
AT1G75710	AT1G75710	AT1G75710	18	267	1	NA	NA	protein_coding	zinc finger (C2H2 type) family protein	---	zinc finger (C2H2 type) family protein; FUNCTIONS IN: transcription factor activity, zinc ion binding, nucleic acid binding; LOCATED IN: intracellular; EXPRESSED IN: 22 plant structures; EXPRESSED DURING: 13 growth stages; CONTAINS InterPro DOMAIN/s: Zinc finger, C2H2-like (InterPro:IPR015880), Zinc finger, C2H2-type (InterPro:IPR007087); BEST Arabidopsis thaliana protein match is: zinc finger (C…	GO:0005622	intracellular	AnalysisReference:501730468	GO:0003676 | GO:0003700 | GO:0008270	nucleic acid binding | transcription factor activity | zinc ion binding	Communication:501714663 | Publication:1345963|PMID:11118137 | Communication:501714663	---	---	---	AT1G75710	1610	498	606	552	548	466	507	710	619	664.5	466	535	500.5	656	753	704.5	585	747	666	339	257	298	401	346	373.5	440	522	481
ERF13	AT2G44840	AT2G44840	18	297	1	NA	NA	protein_coding	ERF13 (ETHYLENE-RESPONSIVE ELEMENT BINDING FACTOR 13); DNA binding / transcription factor	encodes a member of the ERF (ethylene response factor) subfamily B-3 of ERF/AP2 transcription factor family. The protein contains one AP2 domain. There are 18 members in this subfamily including ATERF-1, ATERF-2, AND ATERF-5.	ETHYLENE-RESPONSIVE ELEMENT BINDING FACTOR 13 (ERF13); FUNCTIONS IN: transcription factor activity, DNA binding; INVOLVED IN: ethylene mediated signaling pathway, response to chitin, regulation of transcription, DNA-dependent; LOCATED IN: nucleus; EXPRESSED IN: 12 plant structures; EXPRESSED DURING: 9 growth stages; CONTAINS InterPro DOMAIN/s: DNA-binding, integrase-type (InterPro:IPR016177), Pat…	GO:0005634 | GO:0005634	nucleus | nucleus	Communication:501714663 | Publication:501714452|PMID:15610358	GO:0003677 | GO:0003677 | GO:0003700 | GO:0003700 | GO:0003700	DNA binding | DNA binding | transcription factor activity | transcription factor activity | transcription factor activity	Publication:501723154|PMID:17873090 | Communication:501714663 | Communication:501714663 | Publication:2298|PMID:9687012 | Publication:1345963|PMID:11118137	GO:0006355 | GO:0009873 | GO:0010200	regulation of transcription, DNA-dependent | ethylene mediated signaling pathway | response to chitin	Communication:501714663 | Publication:2298|PMID:9687012 | Publication:501722879|PMID:17722694	ERF13	932	6	9	7.5	22	29	25.5	58	67	62.5	8	8	8	9	8	8.5	2	6	4	12	10	11	15	8	11.5	22	12	17
AT3G10113	AT3G10113	AT3G10113	18	306	1	NA	NA	protein_coding	myb family transcription factor	---	myb family transcription factor; FUNCTIONS IN: transcription factor activity, DNA binding; INVOLVED IN: regulation of transcription; CONTAINS InterPro DOMAIN/s: SANT, DNA-binding (InterPro:IPR001005), Homeodomain-like (InterPro:IPR009057), Myb, DNA-binding (InterPro:IPR014778), Myb-type HTH DNA-binding domain (InterPro:IPR017930), Myb-like DNA-binding region, SHAQKYF class (InterPro:IPR006447); B…	---	---	---	GO:0003677 | GO:0003700	DNA binding | transcription factor activity	Communication:501714663 | Publication:1345963|PMID:11118137	GO:0045449	regulation of transcription	Publication:1345963|PMID:11118137	AT3G10113	1011	500	686	593	329	303	316	158	168	163	387	467	427	584	884	734	968	1305	1136.5	907	648	777.5	464	319	391.5	521	533	527
AT4CL2	AT3G21240	AT3G21240	18	122	1	AT3G21240	1	protein_coding	4CL2 (4-COUMARATE:COA LIGASE 2); 4-coumarate-CoA ligase	encodes an isoform of 4-coumarate:CoA ligase (4CL), which is involved in the last step of the general phenylpropanoid pathway. The catalytic efficiency was in the following (descending) order: p-coumaric acid, caffeic acid, ferulic acid, 5-OH-ferulic acid and cinnamic acid. At4CL2 was unable to use sinapic acid as substrate.	4-COUMARATE:COA LIGASE 2 (4CL2); FUNCTIONS IN: 4-coumarate-CoA ligase activity; INVOLVED IN: phenylpropanoid metabolic process, response to UV, response to fungus, response to wounding; LOCATED IN: cellular_component unknown; EXPRESSED IN: 20 plant structures; EXPRESSED DURING: 12 growth stages; CONTAINS InterPro DOMAIN/s: AMP-dependent synthetase and ligase (InterPro:IPR000873); BEST Arabidopsis…	GO:0005575	cellular_component	Communication:1345790	GO:0016207 | GO:0016207	4-coumarate-CoA ligase activity | 4-coumarate-CoA ligase activity	Publication:1317|PMID:10417722 | Publication:1317|PMID:10417722	GO:0009411 | GO:0009611 | GO:0009620 | GO:0009698 | GO:0009698	response to UV | response to wounding | response to fungus | phenylpropanoid metabolic process | phenylpropanoid metabolic process	Publication:1317|PMID:10417722 | Publication:1317|PMID:10417722 | Publication:1317|PMID:10417722 | Publication:1317|PMID:10417722 | Publication:1317|PMID:10417722	AT4CL2	1964	225	283	254	382	304	343	251	210	230.5	139	195	167	190	203	196.5	145	193	169	310	345	327.5	203	152	177.5	266	339	302.5
PLIM2c	AT3G61230	AT3G61230	18	327	1	NA	NA	protein_coding	LIM domain-containing protein	---	LIM domain-containing protein; FUNCTIONS IN: protein binding, zinc ion binding; INVOLVED IN: biological_process unknown; LOCATED IN: cellular_component unknown; EXPRESSED IN: 9 plant structures; EXPRESSED DURING: L mature pollen stage, M germinated pollen stage, 4 anthesis, C globular stage, petal differentiation and expansion stage; CONTAINS InterPro DOMAIN/s: Zinc finger, LIM-type (InterPro:IPR…	GO:0005575	cellular_component	Communication:501683652	GO:0005515 | GO:0008270	protein binding | zinc ion binding	AnalysisReference:501730468 | AnalysisReference:501730468	GO:0008150	biological_process	Communication:501683652	PLIM2c	912	4	6	5	11	2	6.5	49	48	48.5	13	14	13.5	13	18	15.5	0	4	2	6	6	6	9	3	6	13	10	11.5
PKS4	AT5G04190	AT5G04190	18	2068	4	NA	NA	protein_coding	PKS4 (phytochrome kinase substrate 4)	Encodes phytochrome kinase substrate 4, a phytochrome signaling component involved in phototropism.	phytochrome kinase substrate 4 (PKS4); FUNCTIONS IN: molecular_function unknown; INVOLVED IN: phototropism, red or far red light signaling pathway; LOCATED IN: cellular_component unknown; Has 74 Blast hits to 68 proteins in 14 species: Archae - 0; Bacteria - 0; Metazoa - 1; Fungi - 4; Plants - 51; Viruses - 0; Other Eukaryotes - 18 (source: NCBI BLink).	GO:0005575	cellular_component	Communication:1345790	GO:0003674	molecular_function	Communication:1345790	GO:0009638 | GO:0010017	phototropism | red or far red light signaling pathway	Publication:501719400|PMID:16777956 | Publication:501724608|PMID:18390804	PKS4	1590	76	83	79.5	111	103	107	154	138	146	152	217	184.5	219	296	257.5	147	209	178	164	203	183.5	256	249	252.5	62	66	64
AT1G07050	AT1G07050	AT1G07050	17	236	2	NA	NA	protein_coding	CONSTANS-like protein-related	---	CONSTANS-like protein-related; FUNCTIONS IN: molecular_function unknown; INVOLVED IN: biological_process unknown; LOCATED IN: cellular_component unknown; EXPRESSED IN: 20 plant structures; EXPRESSED DURING: 13 growth stages; CONTAINS InterPro DOMAIN/s: CCT domain (InterPro:IPR010402); BEST Arabidopsis thaliana protein match is: CIL (TAIR:AT4G25990.1); Has 984 Blast hits to 984 proteins in 66 spec…	GO:0005575	cellular_component	Communication:1345790	GO:0003674	molecular_function	Communication:501683652	GO:0008150	biological_process	Communication:1345790	AT1G07050	833	122	125	123.5	171	138	154.5	61	49	55	126	136	131	145	149	147	300	429	364.5	125	184	154.5	108	94	101	117	131	124
RAV1	AT1G13260	AT1G13260	17	238	2	NA	NA	protein_coding	RAV1; DNA binding / transcription factor/ transcription repressor	Encodes an AP2/B3 domain transcription factor which is upregulated in response to low temperature. It contains a B3 DNA binding domain. It has circadian regulation and may function as a negative growth regulator.	RAV1; FUNCTIONS IN: transcription repressor activity, transcription factor activity, DNA binding; INVOLVED IN: in 6 processes; LOCATED IN: nucleus; EXPRESSED IN: 21 plant structures; EXPRESSED DURING: 13 growth stages; CONTAINS InterPro DOMAIN/s: DNA-binding, integrase-type (InterPro:IPR016177), Transcriptional factor B3 (InterPro:IPR003340), Pathogenesis-related transcriptional factor and ERF, D…	GO:0005634 | GO:0005634	nucleus | nucleus	Communication:501714663 | Publication:501714452|PMID:15610358	GO:0003677 | GO:0003677 | GO:0003700 | GO:0003700 | GO:0016564	DNA binding | DNA binding | transcription factor activity | transcription factor activity | transcription repressor activity	Publication:501714818|PMID:15548737 | Publication:1926|PMID:9862967 | Communication:501714663 | Publication:1345963|PMID:11118137 | Publication:501729963|PMID:19324928	GO:0006355 | GO:0009741 | GO:0009910 | GO:0048366 | GO:0048527	regulation of transcription, DNA-dependent | response to brassinosteroid stimulus | negative regulation of flower development | leaf development | lateral root development	Communication:501714663 | Publication:501712041|PMID:15040885 | Publication:501712041|PMID:15040885 | Publication:501712041|PMID:15040885 | Publication:501712041|PMID:15040885	RAV1	1575	151	132	141.5	457	369	413	172	188	180	337	599	468	653	1017	835	1587	2511	2049	501	477	489	1028	682	855	130	143	136.5
HEMA1	AT1G58290	AT1G58290	17	39	1	AT1G58290	1	protein_coding	HEMA1; glutamyl-tRNA reductase	Encodes a protein with glutamyl-tRNA reductase (GluTR) activity, catalyzing the NADPH-dependent reduction of Glu-tRNA(Glu) to glutamate 1-semialdehyde (GSA) with the release of free tRNA(Glu). It is involved in the early steps of chlorophyll biosynthesis.	HEMA1; FUNCTIONS IN: glutamyl-tRNA reductase activity; INVOLVED IN: chlorophyll biosynthetic process, heme biosynthetic process, response to light stimulus, porphyrin biosynthetic process; LOCATED IN: chloroplast; EXPRESSED IN: 23 plant structures; EXPRESSED DURING: 15 growth stages; CONTAINS InterPro DOMAIN/s: Quinate/shikimate 5-dehydrogenase/glutamyl-tRNA reductase (InterPro:IPR006151), Tetrap…	GO:0009507 | GO:0009507	chloroplast | chloroplast	Publication:501682476|PMID:0012445126 | Publication:501712079|PMID:15028209	GO:0008883 | GO:0008883 | GO:0008883	glutamyl-tRNA reductase activity | glutamyl-tRNA reductase activity | glutamyl-tRNA reductase activity	Publication:4959|PMID:7908550 | Publication:4959|PMID:7908550 | Publication:843|PMID:10631248	GO:0006779 | GO:0006783 | GO:0009416 | GO:0015995	porphyrin biosynthetic process | heme biosynthetic process | response to light stimulus | chlorophyll biosynthetic process	Publication:4959|PMID:7908550 | Publication:843|PMID:10631248 | Publication:4959|PMID:7908550 | Publication:843|PMID:10631248	HEMA1	2083	22854	27989	25421.5	30919	27214	29066.5	35200	35722	35461	24662	33341	29001.5	28029	33268	30648.5	18362	23736	21049	24464	23821	24142.5	29524	25444	27484	27365	30539	28952
CRF5	AT2G46310	AT2G46310	17	300	1	NA	NA	protein_coding	CRF5 (CYTOKININ RESPONSE FACTOR 5); DNA binding / transcription factor	CRF5 encodes one of the six cytokinin response factors. It is transcriptionally upregulated in response to cytokinin. CRF5 belongs to the AP2/ERF superfamily of the transcriptional factors. CRF proteins rapidly relocalize to the nucleus in response to cytokinin. Analysis of loos-of-function mutants revealed that the CRFs function redundantly to regulate the development of embryos, cotyledons and …	CYTOKININ RESPONSE FACTOR 5 (CRF5); FUNCTIONS IN: transcription factor activity, DNA binding; INVOLVED IN: embryonic development ending in seed dormancy, cotyledon development, regulation of transcription, DNA-dependent, leaf development, transcription factor import into nucleus; LOCATED IN: nucleus; EXPRESSED IN: 12 plant structures; EXPRESSED DURING: 6 growth stages; CONTAINS InterPro DOMAIN/s:…	GO:0005634	nucleus	Communication:501714663	GO:0003677 | GO:0003700 | GO:0003700	DNA binding | transcription factor activity | transcription factor activity	Communication:501714663 | Communication:501714663 | Publication:1345963|PMID:11118137	GO:0006355 | GO:0009793 | GO:0042991 | GO:0048366 | GO:0048825	regulation of transcription, DNA-dependent | embryonic development ending in seed dormancy | transcription factor import into nucleus | leaf development | cotyledon development	Communication:501714663 | Publication:501719226|PMID:16832061 | Publication:501719226|PMID:16832061 | Publication:501719226|PMID:16832061 | Publication:501719226|PMID:16832061	CRF5	1355	84	109	96.5	93	74	83.5	639	672	655.5	85	80	82.5	68	72	70	70	113	91.5	178	173	175.5	97	71	84	195	197	196
E2L2	AT3G01330	AT3G01330	17	303	1	NA	NA	protein_coding	DEL3 (DP-E2F-LIKE PROTEIN 3); DNA binding / transcription factor	Member of the E2F transcription factors, (cell cycle genes), key components of the cyclin D/retinoblastoma/E2F pathway.	DP-E2F-LIKE PROTEIN 3 (DEL3); FUNCTIONS IN: transcription factor activity, DNA binding; INVOLVED IN: regulation of transcription, DNA-dependent; LOCATED IN: nucleus, cytoplasm; EXPRESSED IN: 16 plant structures; EXPRESSED DURING: 9 growth stages; CONTAINS InterPro DOMAIN/s: Winged helix repressor DNA-binding (InterPro:IPR011991), Transcription factor E2F/dimerisation partner (TDP) (InterPro:IPR00…	GO:0005634 | GO:0005737	nucleus | cytoplasm	Publication:1547275|PMID:11867638 | Publication:1547275|PMID:11867638	GO:0003677 | GO:0003700	DNA binding | transcription factor activity	Publication:1547275|PMID:11867638 | Publication:1345963|PMID:11118137	GO:0006355	regulation of transcription, DNA-dependent	AnalysisReference:501730468	E2L2	1312	96	89	92.5	149	129	139	63	80	71.5	121	172	146.5	113	146	129.5	122	186	154	139	139	139	152	119	135.5	111	163	137
MBF1C	AT3G24500	AT3G24500	17	311	1	NA	NA	protein_coding	MBF1C (MULTIPROTEIN BRIDGING FACTOR 1C); DNA binding / transcription coactivator/ transcription factor	One of three genes in A. thaliana encoding multiprotein bridging factor 1, a highly conserved transcriptional coactivator. May serve as a bridging factor between a bZIP factor and TBP. Its expression is specifically elevated in response to pathogen infection, salinity, drought, heat, hydrogen peroxide, and application of abscisic acid or salicylic acid. Constitutive expression enhances the tolera…	MULTIPROTEIN BRIDGING FACTOR 1C (MBF1C); FUNCTIONS IN: transcription coactivator activity, transcription factor activity, DNA binding; INVOLVED IN: in 7 processes; LOCATED IN: nucleolus; EXPRESSED IN: 24 plant structures; EXPRESSED DURING: 14 growth stages; CONTAINS InterPro DOMAIN/s: Lambda repressor-like, DNA-binding (InterPro:IPR010982), Multiprotein bridging factor 1, N-terminal (InterPro:IPR…	GO:0005730	nucleolus	Publication:501718099|PMID:16283071	GO:0003677 | GO:0003700 | GO:0003713 | GO:0003713	DNA binding | transcription factor activity | transcription coactivator activity | transcription coactivator activity	Communication:501714663 | Publication:2298|PMID:9687012 | Publication:501711853|PMID:14988493 | Communication:501714663	GO:0006350 | GO:0009408 | GO:0009414 | GO:0009723 | GO:0009737 | GO:0009873 | GO:0045941	transcription | response to heat | response to water deprivation | response to ethylene stimulus | response to abscisic acid stimulus | ethylene mediated signaling pathway | positive regulation of transcription	Communication:501714663 | Publication:501713128|PMID:15451167 | Publication:501713128|PMID:15451167 | Communication:501714663 | Publication:501711853|PMID:14988493 | Publication:2298|PMID:9687012 | Publication:501711853|PMID:14988493	MBF1C	744	1222	1704	1463	268	227	247.5	280	236	258	78	84	81	161	157	159	72	106	89	1316	819	1067.5	203	190	196.5	731	731	731
TMO5	AT3G25710	AT3G25710	17	312	1	NA	NA	protein_coding	BHLH32 (BASIC HELIX-LOOP-HELIX 32); DNA binding / transcription factor	---	BASIC HELIX-LOOP-HELIX 32 (BHLH32); FUNCTIONS IN: transcription factor activity, DNA binding; INVOLVED IN: regulation of transcription; LOCATED IN: nucleus; EXPRESSED IN: 21 plant structures; EXPRESSED DURING: 10 growth stages; CONTAINS InterPro DOMAIN/s: Basic helix-loop-helix dimerisation region bHLH (InterPro:IPR001092), Helix-loop-helix DNA-binding (InterPro:IPR011598); BEST Arabidopsis thali…	GO:0005634	nucleus	AnalysisReference:501730468	GO:0003677 | GO:0003700 | GO:0003700	DNA binding | transcription factor activity | transcription factor activity	Communication:501714663 | Publication:1345963|PMID:11118137 | Publication:501705886|PMID:12679534	GO:0045449	regulation of transcription	Publication:1345963|PMID:11118137	TMO5	1412	178	240	209	372	307	339.5	363	479	421	214	263	238.5	257	296	276.5	133	165	149	549	639	594	359	345	352	329	374	351.5
GH3-10	AT4G03400	AT4G03400	17	1882	1	NA	NA	protein_coding	DFL2 (DWARF IN LIGHT 2)	Encodes a GH3-related gene involved in red light-specific hypocotyl elongation. Analysis of sense and antisense transgenic plants suggests that DFL2 is located downstream of red light signal transduction and determines the degree of hypocotyl elongation.	DWARF IN LIGHT 2 (DFL2); INVOLVED IN: response to auxin stimulus, response to light stimulus; LOCATED IN: chloroplast; EXPRESSED IN: 24 plant structures; EXPRESSED DURING: 14 growth stages; CONTAINS InterPro DOMAIN/s: GH3 auxin-responsive promoter (InterPro:IPR004993); BEST Arabidopsis thaliana protein match is: JAR1 (JASMONATE RESISTANT 1); ATP binding / adenylyltransferase/ catalytic/ jasmonate…	GO:0009507	chloroplast	Publication:501724486|PMID:18431481	---	---	---	GO:0009416 | GO:0009733	response to light stimulus | response to auxin stimulus	Publication:501711511|PMID:14581632 | Communication:501714663	GH3-10	2051	255	423	339	564	648	606	495	532	513.5	670	1093	881.5	1053	1564	1308.5	1402	1886	1644	1063	877	970	1253	998	1125.5	614	572	593
NAC089	AT5G22290	AT5G22290	17	364	1	NA	NA	protein_coding	anac089 (Arabidopsis NAC domain containing protein 89); transcription factor	---	Arabidopsis NAC domain containing protein 89 (anac089); FUNCTIONS IN: transcription factor activity; INVOLVED IN: multicellular organismal development, regulation of transcription; LOCATED IN: cellular_component unknown; EXPRESSED IN: 22 plant structures; EXPRESSED DURING: 12 growth stages; CONTAINS InterPro DOMAIN/s: No apical meristem (NAM) protein (InterPro:IPR003441); BEST Arabidopsis thalian…	GO:0005575	cellular_component	Communication:1345790	GO:0003700	transcription factor activity	Publication:1345963|PMID:11118137	GO:0007275 | GO:0045449	multicellular organismal development | regulation of transcription	Communication:501714663 | AnalysisReference:501730468	NAC089	1290	275	292	283.5	251	249	250	244	227	235.5	145	223	184	194	219	206.5	167	217	192	357	344	350.5	247	172	209.5	346	419	382.5
IAA22	AT1G19220	AT1G19220	16	243	2	NA	NA	protein_coding	ARF19 (AUXIN RESPONSE FACTOR 19); DNA binding / transcription factor	Encodes an auxin response factor that contains the conserved VP1-B3 DNA-binding domain at its N-terminus and the Aux/IAA-like domains III and IV present in most ARFs at its C-terminus. The protein interacts with IAA1 (yeast two hybrid) and other auxin response elements such as ER7 and ER9 (yeast one hybrid). ARF19 protein can complement many aspects of the arf7 mutant phenotype and , together wit…	AUXIN RESPONSE FACTOR 19 (ARF19); FUNCTIONS IN: transcription factor activity, DNA binding; INVOLVED IN: response to ethylene stimulus, response to auxin stimulus, lateral root primordium development, leaf development, lateral root development; LOCATED IN: nucleus; EXPRESSED IN: 25 plant structures; EXPRESSED DURING: 13 growth stages; CONTAINS InterPro DOMAIN/s: Aux/IAA-ARF-dimerisation (InterPro…	GO:0005634	nucleus	Publication:501720685|PMID:17259263	GO:0003677 | GO:0003700	DNA binding | transcription factor activity	Publication:501720685|PMID:17259263 | Publication:1345963|PMID:11118137	GO:0009723 | GO:0009733 | GO:0009733 | GO:0009733 | GO:0010386 | GO:0048366 | GO:0048527	response to ethylene stimulus | response to auxin stimulus | response to auxin stimulus | response to auxin stimulus | lateral root primordium development | leaf development | lateral root development	Publication:501718579|PMID:16461383 | Publication:501720685|PMID:17259263 | Publication:501714464|PMID:15659631 | Publication:1546885 | Publication:501720685|PMID:17259263 | Publication:501716455|PMID:15960621 | Publication:501716455|PMID:15960621	IAA22	3896	135	153	144	245	205	225	394	366	380	234	306	270	356	414	385	426	527	476.5	306	336	321	393	399	396	198	196	197
TEM1	AT1G25560	AT1G25560	16	17	1	AT1G25560	1	protein_coding	TEM1 (TEMPRANILLO 1); transcription factor	Encodes a member of the RAV transcription factor family that contains AP2 and B3 binding domains. Involved in the regulation of flowering under long days. Loss of function results in early flowering. Overexpression causes late flowering and repression of expression of FT.	TEMPRANILLO 1 (TEM1); FUNCTIONS IN: transcription factor activity; INVOLVED IN: photoperiodism, flowering; LOCATED IN: chloroplast; EXPRESSED IN: 22 plant structures; EXPRESSED DURING: 13 growth stages; CONTAINS InterPro DOMAIN/s: DNA-binding, integrase-type (InterPro:IPR016177), Transcriptional factor B3 (InterPro:IPR003340), Pathogenesis-related transcriptional factor and ERF, DNA-binding (Inte…	GO:0009507	chloroplast	AnalysisReference:501730133	GO:0003677 | GO:0003700	DNA binding | transcription factor activity	Publication:501709105 | Publication:1345963|PMID:11118137	GO:0009873 | GO:0048573	ethylene mediated signaling pathway | "photoperiodism, flowering"	Publication:501709105 | Publication:501727458|PMID:18718758	TEM1	1365	200	163	181.5	538	518	528	202	236	219	477	704	590.5	515	741	628	698	1056	877	336	363	349.5	791	672	731.5	173	154	163.5
SCL3	AT1G50420	AT1G50420	16	252	1	NA	NA	protein_coding	SCL3; transcription factor	Encodes a scarecrow-like protein (SCL3) Putative transcription factors interacting with the gene product of VHA-B1 (vacuolar ATPase subunit B1; as shown through yeast two-hybrid assay).	SCL3; FUNCTIONS IN: transcription factor activity; INVOLVED IN: response to gibberellin stimulus, regulation of transcription; LOCATED IN: nucleus; EXPRESSED IN: 23 plant structures; EXPRESSED DURING: 13 growth stages; CONTAINS InterPro DOMAIN/s: GRAS transcription factor (InterPro:IPR005202); BEST Arabidopsis thaliana protein match is: SCL21 (SCARECROW-LIKE 21); transcription factor (TAIR:AT2G04…	GO:0005634	nucleus	Publication:501720456|PMID:17081979	GO:0003700 | GO:0003700 | GO:0003700 | GO:0003700	transcription factor activity | transcription factor activity | transcription factor activity | transcription factor activity	Communication:501714663 | Publication:1345963|PMID:11118137 | Publication:1486|PMID:10341448 | Publication:1486|PMID:10341448	GO:0009739 | GO:0009739 | GO:0045449	response to gibberellin stimulus | response to gibberellin stimulus | regulation of transcription	Publication:501723369|PMID:17933900 | Publication:501723369|PMID:17933900 | Publication:1345963|PMID:11118137	SCL3	1951	740	819	779.5	725	642	683.5	532	483	507.5	432	546	489	345	404	374.5	185	240	212.5	841	955	898	425	342	383.5	722	807	764.5
SHY1	AT1G52830	AT1G52830	16	38	2	AT1G52830	2	protein_coding	IAA6 (INDOLE-3-ACETIC ACID 6); transcription factor	An extragenic dominant suppressor of the hy2 mutant phenotype. Also exhibits aspects of constitutive photomorphogenetic phenotype in the absence of hy2. Mutants have dominant leaf curling phenotype shortened hypocotyls and reduced apical hook. Induced by indole-3-acetic acid.	INDOLE-3-ACETIC ACID 6 (IAA6); FUNCTIONS IN: transcription factor activity; INVOLVED IN: response to auxin stimulus, de-etiolation; LOCATED IN: nucleus; EXPRESSED IN: 13 plant structures; EXPRESSED DURING: 9 growth stages; CONTAINS InterPro DOMAIN/s: Aux/IAA-ARF-dimerisation (InterPro:IPR011525), AUX/IAA protein (InterPro:IPR003311); BEST Arabidopsis thaliana protein match is: IAA19 (INDOLE-3-ACE…	GO:0005634	nucleus	Publication:4306|PMID:7658471	GO:0003700	transcription factor activity	Publication:1345963|PMID:11118137	GO:0009704 | GO:0009733 | GO:0009733	de-etiolation | response to auxin stimulus | response to auxin stimulus	Publication:3958|PMID:8624510 | Publication:4306|PMID:7658471 | Publication:4306|PMID:7658471	SHY1	829	2	4	3	29	12	20.5	3	5	4	26	46	36	35	32	33.5	6	16	11	135	198	166.5	81	104	92.5	16	7	11.5
STH2	AT1G75540	AT1G75540	16	71	4	AT1G75540	4	protein_coding	STH2 (SALT TOLERANCE HOMOLOG2); transcription factor/ zinc ion binding	---	SALT TOLERANCE HOMOLOG2 (STH2); FUNCTIONS IN: transcription factor activity, zinc ion binding; LOCATED IN: intracellular; EXPRESSED IN: 16 plant structures; EXPRESSED DURING: 8 growth stages; CONTAINS InterPro DOMAIN/s: Zinc finger, B-box (InterPro:IPR000315); BEST Arabidopsis thaliana protein match is: zinc finger (B-box type) family protein (TAIR:AT4G39070.1); Has 2516 Blast hits to 1815 protei…	GO:0005622	intracellular	AnalysisReference:501730468	GO:0003700 | GO:0008270	transcription factor activity | zinc ion binding	Publication:1345963|PMID:11118137 | Communication:501714663	---	---	---	STH2	1282	356	408	382	391	337	364	585	663	624	433	518	475.5	535	671	603	624	928	776	543	521	532	1071	844	957.5	510	494	502
AT1G77200	AT1G77200	AT1G77200	16	269	2	NA	NA	protein_coding	AP2 domain-containing transcription factor TINY, putative	encodes a member of the DREB subfamily A-4 of ERF/AP2 transcription factor family. The protein contains one AP2 domain. There are 17 members in this subfamily including TINY.	AP2 domain-containing transcription factor TINY, putative; FUNCTIONS IN: transcription factor activity, DNA binding; INVOLVED IN: regulation of transcription, DNA-dependent; LOCATED IN: nucleus; CONTAINS InterPro DOMAIN/s: DNA-binding, integrase-type (InterPro:IPR016177), Pathogenesis-related transcriptional factor and ERF, DNA-binding (InterPro:IPR001471); BEST Arabidopsis thaliana protein match…	GO:0005634	nucleus	Communication:501714663	GO:0003677 | GO:0003700 | GO:0003700	DNA binding | transcription factor activity | transcription factor activity	Communication:501714663 | Communication:501714663 | Publication:1345963|PMID:11118137	GO:0006355 | GO:0006355	regulation of transcription, DNA-dependent | "regulation of transcription, DNA-dependent"	Communication:501714663 | AnalysisReference:501730468	AT1G77200	735	11	17	14	54	48	51	31	49	40	38	50	44	46	53	49.5	64	77	70.5	31	48	39.5	77	88	82.5	13	11	12
PKS1	AT2G02950	AT2G02950	16	78	1	AT2G02950	1	protein_coding	PKS1 (PHYTOCHROME KINASE SUBSTRATE 1); protein binding	Encodes a basic soluble protein which can independently bind to either PHYA or PHYB, regardless of whether the phytochromes are in the Pr or Pfr state. PKS1 can be phosphorylated by oat phyA in vitro in a light regulated manner. It is postulated to be a negative regulator of phyB signalling.	PHYTOCHROME KINASE SUBSTRATE 1 (PKS1); FUNCTIONS IN: protein binding; INVOLVED IN: in 6 processes; LOCATED IN: plasma membrane, cytoplasm; EXPRESSED IN: 18 plant structures; EXPRESSED DURING: 9 growth stages; BEST Arabidopsis thaliana protein match is: PKS2 (PHYTOCHROME KINASE SUBSTRATE 2) (TAIR:AT1G14280.1); Has 477 Blast hits to 244 proteins in 80 species: Archae - 0; Bacteria - 85; Metazoa - 9…	GO:0005737 | GO:0005886	cytoplasm | plasma membrane	Publication:1476|PMID:10348744 | Publication:501719400|PMID:16777956	GO:0005515 | GO:0005515 | GO:0005515 | GO:0005515 | GO:0005515	protein binding | protein binding | protein binding | protein binding | protein binding	Publication:501711445|PMID:14615593 | Publication:501719400|PMID:16777956 | Publication:501719400|PMID:16777956 | Publication:1476|PMID:10348744 | Publication:1476|PMID:10348744	GO:0009585 | GO:0009638 | GO:0009958 | GO:0010017 | GO:0010114 | GO:0010218	red, far-red light phototransduction | phototropism | positive gravitropism | red or far red light signaling pathway | response to red light | response to far red light	Publication:1476|PMID:10348744 | Publication:501719400|PMID:16777956 | Publication:501723536|PMID:18024556 | Publication:501719809|PMID:16891401 | Publication:501720486|PMID:17076805 | Publication:501720486|PMID:17076805	PKS1	1592	343	353	348	362	274	318	366	291	328.5	243	348	295.5	380	422	401	584	742	663	210	200	205	200	194	197	211	226	218.5
ZFAR1	AT2G40140	AT2G40140	16	292	1	NA	NA	protein_coding	CZF1; transcription factor	---	CZF1; FUNCTIONS IN: transcription factor activity; INVOLVED IN: defense response to fungus, response to cold, response to chitin, regulation of transcription; LOCATED IN: cellular_component unknown; EXPRESSED IN: 22 plant structures; EXPRESSED DURING: 13 growth stages; CONTAINS InterPro DOMAIN/s: Zinc finger, CCCH-type (InterPro:IPR000571), Ankyrin (InterPro:IPR002110); BEST Arabidopsis thaliana …	GO:0005575	cellular_component	Communication:1345790	GO:0003700	transcription factor activity	Publication:1345963|PMID:11118137	GO:0009409 | GO:0010200 | GO:0045449 | GO:0050832	response to cold | response to chitin | regulation of transcription | defense response to fungus	Publication:501717819|PMID:16258011 | Publication:501722879|PMID:17722694 | Publication:1345963|PMID:11118137 | Publication:501719685|PMID:16925600	ZFAR1	2310	442	658	550	1037	1057	1047	2740	3686	3213	464	707	585.5	412	608	510	349	501	425	745	467	606	618	460	539	1090	869	979.5
RPT1	AT3G45780	AT3G45780	16	137	1	AT3G45780	1	protein_coding	PHOT1 (PHOTOTROPIN 1); FMN binding / blue light photoreceptor/ kinase/ protein binding / protein serine/threonine kinase	Blue-light photoreceptor. Contains a light activated serine-threonine kinase domain and LOV1 and LOV2 repeats. Mutants are defective in blue-light response. Mediates blue light-induced growth enhancements. PHOT1 and PHOT2 mediate blue light-dependent activation of the plasma membrane H+-ATPase in guard cell protoplasts. PHOT1 undergoes blue-light-dependent autophosphorylation. At least eight phos…	PHOTOTROPIN 1 (PHOT1); FUNCTIONS IN: protein binding, protein serine/threonine kinase activity, FMN binding, kinase activity, blue light photoreceptor activity; INVOLVED IN: in 8 processes; LOCATED IN: internal side of plasma membrane, vacuole, cytoplasm; EXPRESSED IN: 23 plant structures; EXPRESSED DURING: 13 growth stages; CONTAINS InterPro DOMAIN/s: PAC motif (InterPro:IPR001610), Protein kina…	GO:0005737 | GO:0005773 | GO:0009898	cytoplasm | vacuole | internal side of plasma membrane	Publication:501681826|PMID:0012172018 | Publication:501714874|PMID:15539469 | Publication:501681826|PMID:0012172018	GO:0004674 | GO:0005515 | GO:0009882 | GO:0010181 | GO:0016301 | GO:0016301	protein serine/threonine kinase activity | protein binding | blue light photoreceptor activity | FMN binding | kinase activity | kinase activity	Publication:1999|PMID:9831559 | Publication:501719400|PMID:16777956 | Publication:1999|PMID:9831559 | Publication:501717658|PMID:16150710 | Communication:501714663 | Publication:501710530|PMID:13678909	GO:0009637 | GO:0009638 | GO:0009903 | GO:0009904 | GO:0010119 | GO:0010155 | GO:0010362 | GO:0046777 | GO:0046777	response to blue light | phototropism | chloroplast avoidance movement | chloroplast accumulation movement | regulation of stomatal movement | regulation of proton transport | negative regulation of anion channel activity by blue light | protein amino acid autophosphorylation | protein amino acid autophosphorylation	Publication:501714985|PMID:15749755 | Publication:2818|PMID:9405347 | Publication:501680704|PMID:11371609 | Publication:501680704|PMID:11371609 | Publication:1546234|PMID:11740564 | Publication:501716548|PMID:15821287 | Publication:501720921|PMID:17319842 | Publication:501724637|PMID:18378899 | Publication:501682623|PMID:0012383086	RPT1	3405	3655	4181	3918	6473	5472	5972.5	6208	6033	6120.5	5984	7788	6886	8762	9888	9325	9213	12157	10685	6882	8222	7552	9669	8676	9172.5	4806	5465	5135.5
DIN6	AT3G47340	AT3G47340	16	138	1	AT3G47340	1	protein_coding	ASN1 (GLUTAMINE-DEPENDENT ASPARAGINE SYNTHASE 1); asparagine synthase (glutamine-hydrolyzing)	encodes a glutamine-dependent asparagine synthetase, the predicted ASN1 peptide contains a purF-type glutamine-binding domain, and is expressed predominantly in shoot tissues, where light has a negative effect on its mRNA accumulation. Expression is induced within 3 hours of dark treatment, in senescing leaves and treatment with exogenous photosynthesis inhibitor. Induction of gene expression was…	GLUTAMINE-DEPENDENT ASPARAGINE SYNTHASE 1 (ASN1); FUNCTIONS IN: asparagine synthase (glutamine-hydrolyzing) activity; INVOLVED IN: in 8 processes; EXPRESSED IN: 23 plant structures; EXPRESSED DURING: 16 growth stages; CONTAINS InterPro DOMAIN/s: Rossmann-like alpha/beta/alpha sandwich fold (InterPro:IPR014729), Glutamine amidotransferase, class-II (InterPro:IPR000583), Asparagine synthase (InterP…	---	---	---	GO:0004066	asparagine synthase (glutamine-hydrolyzing) activity	Publication:4643|PMID:7846154	GO:0009063 | GO:0009416 | GO:0009646 | GO:0009744 | GO:0009744 | GO:0009749 | GO:0009750 | GO:0043617	cellular amino acid catabolic process | response to light stimulus | response to absence of light | response to sucrose stimulus | response to sucrose stimulus | response to glucose stimulus | response to fructose stimulus | cellular response to sucrose starvation	Publication:5882|PMID:11080291 | Publication:4643|PMID:7846154 | Publication:501719320|PMID:16805736 | Publication:4643|PMID:7846154 | Publication:501718563|PMID:16463203 | Publication:501718563|PMID:16463203 | Publication:501718563|PMID:16463203 | Publication:501718239|PMID:16354162	DIN6	2474	164	284	224	147	92	119.5	1189	1853	1521	66	632	349	89	126	107.5	169	188	178.5	73	83	78	45	73	59	214	299	256.5
KT2/3	AT4G22200	AT4G22200	16	1950	1	NA	NA	protein_coding	AKT2/3 (ARABIDOPSIS POTASSIUM TRANSPORT 2/3); cyclic nucleotide binding / inward rectifier potassium channel/ protein binding	Encodes a photosynthate- and light-dependent inward rectifying potassium channel with unique gating properties that are regulated by phosphorylation. Expressed in guard cell protoplasts and in the phloem and xylem of aerial portions of the plant. The channel can coassemble with another K+ channel, KAT1, in vitro. In guard cells, AKT2/3 is responsible for the Ca2+ sensitivity of the K+ uptake chan…	ARABIDOPSIS POTASSIUM TRANSPORT 2/3 (AKT2/3); FUNCTIONS IN: cyclic nucleotide binding, protein binding, inward rectifier potassium channel activity; INVOLVED IN: regulation of membrane potential, response to abscisic acid stimulus; LOCATED IN: membrane; EXPRESSED IN: 24 plant structures; EXPRESSED DURING: 13 growth stages; CONTAINS InterPro DOMAIN/s: Cyclic nucleotide-binding (InterPro:IPR000595)…	GO:0016020	membrane	AnalysisReference:501730468	GO:0005242 | GO:0005242 | GO:0005515 | GO:0030551	inward rectifier potassium channel activity | inward rectifier potassium channel activity | protein binding | cyclic nucleotide binding	Publication:334|PMID:10852932 | Communication:1674994 | Publication:501680350|PMID:11181729 | Communication:501714663	GO:0009737 | GO:0009737 | GO:0042391	response to abscisic acid stimulus | response to abscisic acid stimulus | regulation of membrane potential	Publication:334|PMID:10852932 | Publication:334|PMID:10852932 | Publication:501681821|PMID:0012172027	KT2/3	3169	2011	2333	2172	1533	1348	1440.5	1550	1504	1527	1271	1592	1431.5	1654	1842	1748	759	931	845	1995	2352	2173.5	1343	1335	1339	2595	2968	2781.5
GA5	AT4G25420	AT4G25420	16	156	3	AT4G25420	3	protein_coding	GA20OX1; gibberellin 20-oxidase	Encodes gibberellin 20-oxidase that is involved in the later steps of the gibberellin biosynthetic pathway. Regulated by a circadian clock. Weak expression response to far red light.	GA20OX1; FUNCTIONS IN: gibberellin 20-oxidase activity; INVOLVED IN: in 7 processes; LOCATED IN: cytoplasm; EXPRESSED IN: 10 plant structures; EXPRESSED DURING: 4 anthesis, petal differentiation and expansion stage, E expanded cotyledon stage; CONTAINS InterPro DOMAIN/s: Isopenicillin N synthase (InterPro:IPR002283), 2OG-Fe(II) oxygenase (InterPro:IPR005123); BEST Arabidopsis thaliana protein mat…	GO:0005737	cytoplasm	Publication:1514|PMID:10330476	GO:0045544 | GO:0045544 | GO:0045544 | GO:0045544	gibberellin 20-oxidase activity | gibberellin 20-oxidase activity | gibberellin 20-oxidase activity | gibberellin 20-oxidase activity	Publication:4348|PMID:7604047 | Publication:1514|PMID:10330476 | Publication:501716353|PMID:15923331 | Publication:4364|PMID:7630935	GO:0009686 | GO:0009686 | GO:0009739 | GO:0009740 | GO:0009826 | GO:0009908 | GO:0048575	gibberellin biosynthetic process | gibberellin biosynthetic process | response to gibberellin stimulus | gibberellic acid mediated signaling | unidimensional cell growth | flower development | "short-day photoperiodism, flowering"	Publication:4364|PMID:7630935 | Publication:501716353|PMID:15923331 | Publication:4348|PMID:7604047 | Publication:1514|PMID:10330476 | Publication:501723787|PMID:18069939 | Publication:501723787|PMID:18069939 | Publication:4348|PMID:7604047	GA5	1281	8	7	7.5	40	37	38.5	5	1	3	36	38	37	60	67	63.5	31	57	44	209	219	214	121	132	126.5	13	14	13.5
VTE1	AT4G32770	AT4G32770	16	168	1	AT4G32770	1	protein_coding	VTE1 (VITAMIN E DEFICIENT 1); tocopherol cyclase	Tocopherol cyclase involved in tocopherol (vitamin E)synthesis. VTE1 over-expressing plants have increased tocopherol indicating VTE1 is a major limiting factor in tocopherol synthesis. Mutants defective in this gene accumulate high amounts of zeaxanthin in conditions of high light or low temperature. Plays a role in the adaptation to low temperature stress, notably phloem loading.	VITAMIN E DEFICIENT 1 (VTE1); FUNCTIONS IN: tocopherol cyclase activity; INVOLVED IN: in 9 processes; LOCATED IN: chloroplast, plastoglobule, chloroplast inner membrane; EXPRESSED IN: 23 plant structures; EXPRESSED DURING: 13 growth stages; Has 150 Blast hits to 150 proteins in 52 species: Archae - 2; Bacteria - 66; Metazoa - 0; Fungi - 0; Plants - 39; Viruses - 0; Other Eukaryotes - 43 (source: …	GO:0009507 | GO:0009507 | GO:0009507 | GO:0009706 | GO:0010287 | GO:0010287	chloroplast | chloroplast | chloroplast | chloroplast inner membrane | plastoglobule | plastoglobule	Publication:501682371|PMID:0012213958 | Publication:501712079|PMID:15028209 | Publication:501724486|PMID:18431481 | Publication:501682371|PMID:0012213958 | Publication:501718389|PMID:16414959 | Publication:501718581|PMID:16461379	GO:0009976 | GO:0009976	tocopherol cyclase activity | tocopherol cyclase activity	Publication:501710144|PMID:12913173 | Publication:501682371|PMID:0012213958	GO:0006631 | GO:0006979 | GO:0009266 | GO:0009644 | GO:0009915 | GO:0010189 | GO:0015994 | GO:0016122 | GO:0031347	fatty acid metabolic process | response to oxidative stress | response to temperature stimulus | response to high light intensity | phloem loading | vitamin E biosynthetic process | chlorophyll metabolic process | xanthophyll metabolic process | regulation of defense response	Publication:501717813|PMID:16258032 | Publication:501714532|PMID:15665245 | Publication:501720208|PMID:17012603 | Publication:501714532|PMID:15665245 | Publication:501720208|PMID:17012603 | Publication:501682371|PMID:0012213958 | Publication:501717813|PMID:16258032 | Publication:501717813|PMID:16258032 | Publication:501720501|PMID:17194769	VTE1	1726	2430	2962	2696	3180	2943	3061.5	1923	2020	1971.5	2403	3356	2879.5	2699	3229	2964	1507	1942	1724.5	2803	2820	2811.5	2919	2621	2770	2616	2983	2799.5
AT5G02760	AT5G02760	AT5G02760	16	2058	5	NA	NA	protein_coding	protein phosphatase 2C family protein / PP2C family protein	---	protein phosphatase 2C family protein / PP2C family protein; FUNCTIONS IN: protein serine/threonine phosphatase activity, catalytic activity; INVOLVED IN: protein amino acid dephosphorylation; LOCATED IN: protein serine/threonine phosphatase complex; EXPRESSED IN: 15 plant structures; EXPRESSED DURING: 10 growth stages; CONTAINS InterPro DOMAIN/s: Protein phosphatase 2C, manganese/magnesium aspar…	GO:0008287	protein serine/threonine phosphatase complex	AnalysisReference:501730468	GO:0003824 | GO:0004722 | GO:0004722	catalytic activity | protein serine/threonine phosphatase activity | protein serine/threonine phosphatase activity	AnalysisReference:501730468 | Communication:501714663 | AnalysisReference:501730468	GO:0006470	protein amino acid dephosphorylation	AnalysisReference:501730468	AT5G02760	1543	82	100	91	340	286	313	355	258	306.5	517	685	601	686	947	816.5	801	1240	1020.5	2185	2732	2458.5	5333	4478	4905.5	254	247	250.5
ZAT6	AT5G04340	AT5G04340	16	353	1	NA	NA	protein_coding	ZAT6 (ZINC FINGER OF ARABIDOPSIS THALIANA 6); nucleic acid binding / transcription factor/ zinc ion binding	putative c2h2 zinc finger transcription factor mRNA,	ZINC FINGER OF ARABIDOPSIS THALIANA 6 (ZAT6); FUNCTIONS IN: transcription factor activity, zinc ion binding, nucleic acid binding; LOCATED IN: intracellular; EXPRESSED IN: 15 plant structures; EXPRESSED DURING: 8 growth stages; CONTAINS InterPro DOMAIN/s: Zinc finger, C2H2-like (InterPro:IPR015880), Zinc finger, C2H2-type (InterPro:IPR007087); BEST Arabidopsis thaliana protein match is: STZ (salt…	GO:0005622	intracellular	AnalysisReference:501730468	GO:0003676 | GO:0003700 | GO:0008270	nucleic acid binding | transcription factor activity | zinc ion binding	Communication:501714663 | Publication:1345963|PMID:11118137 | Communication:501714663	---	---	---	ZAT6	976	49	65	57	117	112	114.5	248	318	283	66	78	72	75	81	78	87	99	93	77	62	69.5	74	53	63.5	104	73	88.5
MYB16	AT5G15310	AT5G15310	16	360	1	NA	NA	protein_coding	ATMYB16 (MYB DOMAIN PROTEIN 16); DNA binding / transcription factor	Member of the R2R3 factor gene family.	MYB DOMAIN PROTEIN 16 (ATMYB16); FUNCTIONS IN: transcription factor activity, DNA binding; INVOLVED IN: in 9 processes; EXPRESSED IN: 19 plant structures; EXPRESSED DURING: 12 growth stages; CONTAINS InterPro DOMAIN/s: SANT, DNA-binding (InterPro:IPR001005), Homeodomain-like (InterPro:IPR009057), Myb, DNA-binding (InterPro:IPR014778), Myb-type HTH DNA-binding domain (InterPro:IPR017930), Myb tran…	---	---	---	GO:0003677 | GO:0003700	DNA binding | transcription factor activity	Communication:501714663 | Publication:1345963|PMID:11118137	GO:0000902 | GO:0006355 | GO:0009651 | GO:0009723 | GO:0009733 | GO:0009739 | GO:0009751 | GO:0009753 | GO:0046686	cell morphogenesis | "regulation of transcription, DNA-dependent" | response to salt stress | response to ethylene stimulus | response to auxin stimulus | response to gibberellin stimulus | response to salicylic acid stimulus | response to jasmonic acid stimulus | response to cadmium ion	Publication:501721232|PMID:17376813 | Publication:1979|PMID:9839469 | Publication:501718564|PMID:16463103 | Publication:501718564|PMID:16463103 | Publication:501718564|PMID:16463103 | Publication:501718564|PMID:16463103 | Publication:501718564|PMID:16463103 | Publication:501718564|PMID:16463103 | Publication:501718564|PMID:16463103	MYB16	1325	426	509	467.5	605	476	540.5	1640	1665	1652.5	573	685	629	643	776	709.5	649	835	742	374	344	359	557	506	531.5	456	597	526.5
bHLH071	AT5G46690	AT5G46690	16	376	1	NA	NA	protein_coding	bHLH071 (beta HLH protein 71); DNA binding / transcription factor	---	beta HLH protein 71 (bHLH071); FUNCTIONS IN: transcription factor activity, DNA binding; INVOLVED IN: regulation of transcription; LOCATED IN: nucleus; EXPRESSED IN: 16 plant structures; EXPRESSED DURING: 13 growth stages; CONTAINS InterPro DOMAIN/s: Basic helix-loop-helix dimerisation region bHLH (InterPro:IPR001092), Helix-loop-helix DNA-binding (InterPro:IPR011598); BEST Arabidopsis thaliana p…	GO:0005634	nucleus	AnalysisReference:501730468	GO:0003677 | GO:0003700 | GO:0003700	DNA binding | transcription factor activity | transcription factor activity	Communication:501714663 | Publication:1345963|PMID:11118137 | Publication:501705886|PMID:12679534	GO:0045449	regulation of transcription	Publication:1345963|PMID:11118137	bHLH071	1211	236	252	244	421	371	396	441	361	401	371	351	361	363	335	349	308	396	352	353	435	394	216	156	186	481	623	552
AT5G53420	AT5G53420	AT5G53420	16	381	1	NA	NA	protein_coding	unknown protein	---	unknown protein; FUNCTIONS IN: molecular_function unknown; INVOLVED IN: biological_process unknown; LOCATED IN: cellular_component unknown; EXPRESSED IN: 23 plant structures; EXPRESSED DURING: 13 growth stages; BEST Arabidopsis thaliana protein match is: unknown protein (TAIR:AT4G27900.2); Has 21 Blast hits to 21 proteins in 4 species: Archae - 0; Bacteria - 0; Metazoa - 0; Fungi - 0; Plants - 21…	GO:0005575	cellular_component	Communication:1345790	GO:0003674	molecular_function	Communication:501683652	GO:0008150	biological_process	Communication:1345790	AT5G53420	1425	198	241	219.5	284	279	281.5	183	203	193	351	388	369.5	490	601	545.5	452	533	492.5	270	260	265	293	269	281	358	410	384
POC1	AT1G09530	AT1G09530	15	8	3	AT1G09530	3	protein_coding	PIF3 (PHYTOCHROME INTERACTING FACTOR 3); DNA binding / protein binding / transcription factor/ transcription regulator	Transcription factor interacting with photoreceptors phyA and phyB. Forms a ternary complex in vitro with G-box element of the promoters of LHY, CCA1. Acts as a negative regulator of phyB signalling. It degrades rapidly after irradiation of dark grown seedlings in a process controlled by phytochromes. Does not play a significant role in controlling light input and function of the circadian clockw…	PHYTOCHROME INTERACTING FACTOR 3 (PIF3); FUNCTIONS IN: protein binding, transcription factor activity, transcription regulator activity, DNA binding; INVOLVED IN: in 7 processes; LOCATED IN: nucleus; EXPRESSED IN: 17 plant structures; EXPRESSED DURING: 7 growth stages; CONTAINS InterPro DOMAIN/s: Basic helix-loop-helix dimerisation region bHLH (InterPro:IPR001092), Helix-loop-helix DNA-binding (I…	GO:0005634	nucleus	Publication:1962|PMID:9845368	GO:0003677 | GO:0003677 | GO:0003677 | GO:0003700 | GO:0003700 | GO:0005515 | GO:0030528 | GO:0030528 | GO:0030528	DNA binding | DNA binding | DNA binding | transcription factor activity | transcription factor activity | protein binding | transcription regulator activity | transcription regulator activity | transcription regulator activity	Publication:501720919|PMID:17319847 | Publication:501720919|PMID:17319847 | Communication:501714663 | Publication:1345963|PMID:11118137 | Publication:501705886|PMID:12679534 | Publication:501706884|PMID:12826627 | Publication:1962|PMID:9845368 | Publication:501710200|PMID:12897250 | Publication:1962|PMID:9845368	GO:0007165 | GO:0009639 | GO:0009704 | GO:0009740 | GO:0010017 | GO:0031539	signal transduction | response to red or far red light | de-etiolation | gibberellic acid mediated signaling | red or far red light signaling pathway | positive regulation of anthocyanin metabolic process	Publication:1962|PMID:9845368 | Publication:1543|PMID:10318970 | Publication:501724198|PMID:18252845 | Publication:501723840|PMID:18053005 | Publication:1543|PMID:10318970 | Publication:501720919|PMID:17319847	POC1	2017	111	159	135	138	131	134.5	377	343	360	108	149	128.5	159	157	158	170	189	179.5	148	153	150.5	135	176	155.5	153	186	169.5
MEE7	AT1G10470	AT1G10470	15	11	4	AT1G10470	4	protein_coding	ARR4 (RESPONSE REGULATOR 4); protein binding / transcription regulator/ two-component response regulator	Encodes a two-component response regulator. Acts redundantly with ARR3 in the control of circadian period in a cytokinin-independent manner.	RESPONSE REGULATOR 4 (ARR4); FUNCTIONS IN: protein binding, transcription regulator activity, two-component response regulator activity; INVOLVED IN: in 8 processes; LOCATED IN: nucleus, cytoplasm; EXPRESSED IN: 26 plant structures; EXPRESSED DURING: 14 growth stages; CONTAINS InterPro DOMAIN/s: CheY-like (InterPro:IPR011006), Signal transduction response regulator, receiver region (InterPro:IPR0…	GO:0005634 | GO:0005634 | GO:0005737 | GO:0005737	nucleus | nucleus | cytoplasm | cytoplasm	Publication:1546057|PMID:11691995 | Publication:501727302|PMID:18642946 | Publication:1546057|PMID:11691995 | Publication:501727302|PMID:18642946	GO:0000156 | GO:0000156 | GO:0000156 | GO:0005515 | GO:0030528	two-component response regulator activity | two-component response regulator activity | two-component response regulator activity | protein binding | transcription regulator activity	Publication:2577|PMID:9607306 | Communication:1675000 | Publication:501681565|PMID:12068096 | Publication:1546057|PMID:11691995 | Publication:501681565|PMID:12068096	GO:0006950 | GO:0007623 | GO:0009735 | GO:0009735 | GO:0009736 | GO:0009736 | GO:0009793 | GO:0010017 | GO:0010114 | GO:0042752	response to stress | circadian rhythm | response to cytokinin stimulus | response to cytokinin stimulus | cytokinin mediated signaling | cytokinin mediated signaling | embryonic development ending in seed dormancy | red or far red light signaling pathway | response to red light | regulation of circadian rhythm	Publication:2577|PMID:9607306 | Publication:501718302|PMID:16326927 | Publication:2483|PMID:9634588 | Publication:501718422|PMID:16407152 | Publication:501723793|PMID:18065689 | Publication:501681565|PMID:12068096 | Publication:501714637|PMID:15634699 | Publication:1546057|PMID:11691995 | Publication:501711897|PMID:14973166 | Publication:501718302|PMID:16326927	MEE7	1275	930	1100	1015	623	664	643.5	2819	2977	2898	449	560	504.5	720	783	751.5	806	1216	1011	886	1069	977.5	320	262	291	1149	1254	1201.5
AT1G18810	AT1G18810	AT1G18810	15	14	1	AT1G18810	1	protein_coding	phytochrome kinase substrate-related	---	phytochrome kinase substrate-related; FUNCTIONS IN: molecular_function unknown; INVOLVED IN: biological_process unknown; LOCATED IN: cellular_component unknown; EXPRESSED IN: 14 plant structures; EXPRESSED DURING: 7 growth stages; BEST Arabidopsis thaliana protein match is: PKS1 (PHYTOCHROME KINASE SUBSTRATE 1); protein binding (TAIR:AT2G02950.1); Has 438 Blast hits to 361 proteins in 37 species:…	GO:0005575	cellular_component	Communication:1345790	GO:0003674	molecular_function	Communication:501683652	GO:0008150	biological_process	Communication:1345790	AT1G18810	1435	1378	1599	1488.5	1064	920	992	1341	1366	1353.5	926	1275	1100.5	938	1182	1060	796	1045	920.5	1267	1239	1253	1019	904	961.5	1319	1663	1491
MYB3	AT1G22640	AT1G22640	15	247	1	NA	NA	protein_coding	MYB3 (MYB DOMAIN PROTEIN 3); DNA binding / transcription factor	MYB-type transcription factor (MYB3) that represses phenylpropanoid biosynthesis gene expression	MYB DOMAIN PROTEIN 3 (MYB3); FUNCTIONS IN: transcription factor activity, DNA binding; INVOLVED IN: in 12 processes; EXPRESSED IN: 23 plant structures; EXPRESSED DURING: 13 growth stages; CONTAINS InterPro DOMAIN/s: SANT, DNA-binding (InterPro:IPR001005), Homeodomain-like (InterPro:IPR009057), Myb, DNA-binding (InterPro:IPR014778), Myb-type HTH DNA-binding domain (InterPro:IPR017930), Homeodomain…	---	---	---	GO:0003677 | GO:0003700	DNA binding | transcription factor activity	Communication:501714663 | Publication:1345963|PMID:11118137	GO:0006355 | GO:0009611 | GO:0009651 | GO:0009723 | GO:0009733 | GO:0009737 | GO:0009739 | GO:0009751 | GO:0009753 | GO:0009800 | GO:0009892 | GO:0046686	regulation of transcription, DNA-dependent | response to wounding | response to salt stress | response to ethylene stimulus | response to auxin stimulus | response to abscisic acid stimulus | response to gibberellin stimulus | response to salicylic acid stimulus | response to jasmonic acid stimulus | cinnamic acid biosynthetic process | negative regulation of metabolic process | response to cadmi…	Publication:1979|PMID:9839469 | Publication:501681551|PMID:12068110 | Publication:501718564|PMID:16463103 | Publication:501718564|PMID:16463103 | Publication:501718564|PMID:16463103 | Publication:501718564|PMID:16463103 | Publication:501718564|PMID:16463103 | Publication:501718564|PMID:16463103 | Publication:501718564|PMID:16463103 | Publication:501681551|PMID:12068110 | Publication:501681551|PMI…	MYB3	1077	386	417	401.5	239	234	236.5	155	168	161.5	264	297	280.5	392	507	449.5	385	589	487	279	244	261.5	334	273	303.5	347	358	352.5
AT1G69570	AT1G69570	AT1G69570	15	262	1	NA	NA	protein_coding	Dof-type zinc finger domain-containing protein	---	Dof-type zinc finger domain-containing protein; FUNCTIONS IN: transcription factor activity, DNA binding; INVOLVED IN: regulation of transcription; LOCATED IN: cellular_component unknown; EXPRESSED IN: 11 plant structures; EXPRESSED DURING: 4 anthesis, LP.04 four leaves visible, petal differentiation and expansion stage; CONTAINS InterPro DOMAIN/s: Zinc finger, Dof-type (InterPro:IPR003851); BEST…	GO:0005575	cellular_component	Communication:1345790	GO:0003677 | GO:0003700 | GO:0003700	DNA binding | transcription factor activity | transcription factor activity	Communication:501714663 | Publication:1345963|PMID:11118137 | Publication:501682896|PMID:12475498	GO:0045449	regulation of transcription	Publication:1345963|PMID:11118137	AT1G69570	1709	64	63	63.5	92	83	87.5	109	139	124	58	79	68.5	76	95	85.5	39	38	38.5	133	212	172.5	127	106	116.5	114	143	128.5
WRKY40	AT1G80840	AT1G80840	15	271	1	NA	NA	protein_coding	WRKY40; transcription factor	Pathogen-induced transcription factor. Binds W-box sequences in vitro. Forms protein complexes with itself and with WRKY40 and WRKY60. Coexpression with WRKY18 or WRKY60 made plants more susceptible to both P. syringae and B. cinerea. WRKY18, WRKY40, and WRKY60 have partially redundant roles in response to the hemibiotrophic bacterial pathogen Pseudomonas syringae and the necrotrophic fungal path…	WRKY40; FUNCTIONS IN: transcription factor activity; INVOLVED IN: in 8 processes; LOCATED IN: nucleus; EXPRESSED IN: 20 plant structures; EXPRESSED DURING: 10 growth stages; CONTAINS InterPro DOMAIN/s: DNA-binding WRKY (InterPro:IPR003657); BEST Arabidopsis thaliana protein match is: WRKY18; transcription factor (TAIR:AT4G31800.2); Has 1973 Blast hits to 1689 proteins in 109 species: Archae - 0; …	GO:0005634	nucleus	Publication:501718948|PMID:16603654	GO:0003700 | GO:0003700 | GO:0003700 | GO:0003700 | GO:0003700 | GO:0003700 | GO:0003700 | GO:0003700	transcription factor activity | transcription factor activity | transcription factor activity | transcription factor activity | transcription factor activity | transcription factor activity | transcription factor activity | transcription factor activity	Publication:501718948|PMID:16603654 | Communication:501714663 | Publication:492|PMID:10785665 | Communication:1674991 | Communication:1674991 | Publication:1345963|PMID:11118137 | Publication:492|PMID:10785665 | Publication:492|PMID:10785665	GO:0006355 | GO:0009611 | GO:0009751 | GO:0010200 | GO:0031347 | GO:0042742 | GO:0050691 | GO:0050832	regulation of transcription, DNA-dependent | response to wounding | response to salicylic acid stimulus | response to chitin | regulation of defense response | defense response to bacterium | regulation of defense response to virus by host | defense response to fungus	Communication:501714663 | Publication:501729049|PMID:17953483 | Publication:501683335|PMID:12602888 | Publication:501722879|PMID:17722694 | Publication:501681548|PMID:12068113 | Publication:501683335|PMID:12602888 | Publication:501722637|PMID:17185563 | Publication:501718948|PMID:16603654	WRKY40	1195	58	44	51	84	115	99.5	514	966	740	65	90	77.5	39	87	63	39	66	52.5	88	34	61	104	57	80.5	105	78	91.5
NAI1	AT2G22770	AT2G22770	15	280	2	NA	NA	protein_coding	NAI1; DNA binding / transcription factor	regulates the development of ER bodies. also involves in response to the endophytic fungus Piriformospora indica.	NAI1; FUNCTIONS IN: transcription factor activity, DNA binding; INVOLVED IN: regulation of transcription; LOCATED IN: nucleus; EXPRESSED IN: 6 plant structures; EXPRESSED DURING: 4 anthesis; CONTAINS InterPro DOMAIN/s: Basic helix-loop-helix dimerisation region bHLH (InterPro:IPR001092), Helix-loop-helix DNA-binding (InterPro:IPR011598); BEST Arabidopsis thaliana protein match is: basic helix-loo…	GO:0005634	nucleus	AnalysisReference:501730468	GO:0003677 | GO:0003700 | GO:0003700 | GO:0003700	DNA binding | transcription factor activity | transcription factor activity | transcription factor activity	Communication:501714663 | Communication:501714663 | Publication:1345963|PMID:11118137 | Publication:501705886|PMID:12679534	GO:0045449	regulation of transcription	Publication:1345963|PMID:11118137	NAI1	1370	302	281	291.5	641	566	603.5	271	195	233	486	613	549.5	566	581	573.5	556	768	662	192	246	219	196	173	184.5	205	247	226
HSFA2	AT2G26150	AT2G26150	15	88	1	AT2G26150	1	protein_coding	ATHSFA2; DNA binding / transcription factor	member of Heat Stress Transcription Factor (Hsf) family. Involved in response to misfolded protein accumulation in the cytosol. Regulated by alternative splicing and non-sense-mediated decay.	ATHSFA2; FUNCTIONS IN: transcription factor activity, DNA binding; INVOLVED IN: response to high light intensity, cellular response to unfolded protein, response to hydrogen peroxide, response to heat, response to chitin; LOCATED IN: endomembrane system, nucleus; EXPRESSED IN: 8 plant structures; EXPRESSED DURING: 4 anthesis, C globular stage, petal differentiation and expansion stage; CONTAINS I…	GO:0005634 | GO:0012505	nucleus | endomembrane system	AnalysisReference:501730468 | AnalysisReference:501730133	GO:0003677 | GO:0003700 | GO:0003700	DNA binding | transcription factor activity | transcription factor activity	Communication:501714663 | Communication:501714663 | Publication:1345963|PMID:11118137	GO:0009408 | GO:0009408 | GO:0009644 | GO:0010200 | GO:0034620 | GO:0034620 | GO:0034620 | GO:0042542	response to heat | response to heat | response to high light intensity | response to chitin | cellular response to unfolded protein | cellular response to unfolded protein | cellular response to unfolded protein | response to hydrogen peroxide	Publication:501712900|PMID:15247379 | Publication:501720058|PMID:17059409 | Publication:501720058|PMID:17059409 | Publication:501722879|PMID:17722694 | Publication:501729791|PMID:19244141 | Publication:501729791|PMID:19244141 | Publication:501729791|PMID:19244141 | Publication:501720058|PMID:17059409	HSFA2	1422	268	601	434.5	97	60	78.5	4	9	6.5	5	16	10.5	8	22	15	4	45	24.5	662	230	446	41	26	33.5	176	131	153.5
BZIP24	AT3G51960	AT3G51960	15	319	2	NA	NA	protein_coding	bZIP family transcription factor	---	bZIP family transcription factor; FUNCTIONS IN: transcription factor activity, DNA binding; INVOLVED IN: regulation of transcription, DNA-dependent; LOCATED IN: nucleus; EXPRESSED IN: 13 plant structures; EXPRESSED DURING: 9 growth stages; CONTAINS InterPro DOMAIN/s: Basic-leucine zipper (bZIP) transcription factor (InterPro:IPR004827), Basic leucine zipper (InterPro:IPR011700); BEST Arabidopsis …	GO:0005634	nucleus	AnalysisReference:501730468	GO:0003677 | GO:0003700 | GO:0003700 | GO:0003700	DNA binding | transcription factor activity | transcription factor activity | transcription factor activity	Communication:501714663 | Communication:501714663 | Publication:1345963|PMID:11118137 | Publication:1547369|PMID:11906833	GO:0006355 | GO:0006355	regulation of transcription, DNA-dependent | "regulation of transcription, DNA-dependent"	Communication:501714663 | AnalysisReference:501730468	BZIP24	996	36	70	53	56	43	49.5	102	114	108	50	62	56	58	56	57	52	56	54	25	42	33.5	17	17	17	62	83	72.5
AT3G57800	AT3G57800	AT3G57800	15	324	1	NA	NA	protein_coding	basic helix-loop-helix (bHLH) family protein	---	basic helix-loop-helix (bHLH) family protein; FUNCTIONS IN: transcription factor activity, DNA binding; INVOLVED IN: regulation of transcription; LOCATED IN: nucleus; EXPRESSED IN: 21 plant structures; EXPRESSED DURING: 13 growth stages; CONTAINS InterPro DOMAIN/s: Basic helix-loop-helix dimerisation region bHLH (InterPro:IPR001092), Helix-loop-helix DNA-binding (InterPro:IPR011598); BEST Arabido…	GO:0005634	nucleus	AnalysisReference:501730468	GO:0003677 | GO:0003700 | GO:0003700 | GO:0003700	DNA binding | transcription factor activity | transcription factor activity | transcription factor activity	Communication:501714663 | Communication:501714663 | Publication:1345963|PMID:11118137 | Publication:501705886|PMID:12679534	GO:0045449	regulation of transcription	Publication:1345963|PMID:11118137	AT3G57800	1926	1315	1794	1554.5	1373	1151	1262	2356	2474	2415	1181	1270	1225.5	1082	1224	1153	1022	1225	1123.5	2569	2764	2666.5	1944	1460	1702	3414	3940	3677
KAN1	AT5G16560	AT5G16560	15	361	1	NA	NA	protein_coding	KAN (KANADI); transcription factor	Encodes a KANADI protein (KAN) that regulates organ polarity in Arabidopsis. KAN is required for abaxial identity in both leaves and carpels, and encodes a nuclear-localized protein in the GARP family of putative transcription factors. Together with KAN2, this gene appears to be involved in the development of the carpel and the outer integument of the ovule.Along with KAN2 and KAN4, KAN1 appears …	KANADI (KAN); FUNCTIONS IN: transcription factor activity; INVOLVED IN: in 8 processes; LOCATED IN: nucleus; EXPRESSED IN: 13 plant structures; EXPRESSED DURING: 4 anthesis, F mature embryo stage, petal differentiation and expansion stage, D bilateral stage, E expanded cotyledon stage; CONTAINS InterPro DOMAIN/s: Homeodomain-like (InterPro:IPR009057), Myb, DNA-binding (InterPro:IPR014778), Myb-li…	GO:0005634	nucleus	Publication:501680717|PMID:11395775	GO:0003700 | GO:0003700	transcription factor activity | transcription factor activity	Publication:1345963|PMID:11118137 | Publication:501680717|PMID:11395775	GO:0009887 | GO:0009943 | GO:0009944 | GO:0009956 | GO:0010051 | GO:0010158 | GO:0048440 | GO:0048481	organ morphogenesis | adaxial/abaxial axis specification | polarity specification of adaxial/abaxial axis | radial pattern formation | xylem and phloem pattern formation | abaxial cell fate specification | carpel development | ovule development	Publication:501680717|PMID:11395775 | Publication:501728970|PMID:18849474 | Publication:501722820|PMID:17601823 | Publication:501711265|PMID:14561401 | Publication:501711265|PMID:14561401 | Publication:501717681|PMID:16199616 | Publication:501718878|PMID:16623911 | Publication:501718878|PMID:16623911	KAN1	2046	226	218	222	230	196	213	554	504	529	285	308	296.5	289	331	310	358	393	375.5	167	150	158.5	155	128	141.5	151	222	186.5
BEL1	AT5G41410	AT5G41410	15	371	3	NA	NA	protein_coding	BEL1 (BELL 1); DNA binding / protein binding / transcription factor	Homeodomain protein required for ovule identity.Loss of function mutations show homeotic conversion of integuments to carpels.Forms heterodimers with STM and KNAT1. Interacts with AG-SEP heterodimers is thought to restrict WUS expression. BEL interacts with MADS box dimers composed of SEP1(or SEP3) and AG, SHP1, SHP2 and STK. The interaction of BEL1 with AG-SEP3 is required for proper integument …	BELL 1 (BEL1); FUNCTIONS IN: protein binding, transcription factor activity, DNA binding; INVOLVED IN: ovule development; LOCATED IN: cytosol, nucleus; EXPRESSED IN: 22 plant structures; EXPRESSED DURING: 12 growth stages; CONTAINS InterPro DOMAIN/s: Homeobox, conserved site (InterPro:IPR017970), Homeobox (InterPro:IPR001356), Homeodomain-like (InterPro:IPR009057), POX (InterPro:IPR006563), Homeo…	GO:0005634 | GO:0005829	nucleus | cytosol	Publication:4161|PMID:8521490 | Publication:4161|PMID:8521490	GO:0003677 | GO:0003700 | GO:0005515	DNA binding | transcription factor activity | protein binding	Communication:501714663 | Publication:1345963|PMID:11118137 | Publication:1546042|PMID:11701881	GO:0048481	ovule development	Publication:501678277	BEL1	2454	189	219	204	186	197	191.5	404	457	430.5	214	304	259	360	441	400.5	400	542	471	87	110	98.5	101	89	95	167	223	195
NAC003	AT1G02220	AT1G02220	14	232	1	NA	NA	protein_coding	ANAC003 (Arabidopsis NAC domain containing protein 3); transcription factor	---	Arabidopsis NAC domain containing protein 3 (ANAC003); FUNCTIONS IN: transcription factor activity; INVOLVED IN: multicellular organismal development, regulation of transcription; LOCATED IN: cellular_component unknown; EXPRESSED IN: 17 plant structures; EXPRESSED DURING: LP.06 six leaves visible, 4 anthesis, LP.04 four leaves visible, 4 leaf senescence stage, petal differentiation and expansion …	GO:0005575	cellular_component	Communication:1345790	GO:0003700	transcription factor activity	Publication:1345963|PMID:11118137	GO:0007275 | GO:0045449	multicellular organismal development | regulation of transcription	Communication:501714663 | AnalysisReference:501730468	NAC003	1353	25	41	33	67	29	48	29	24	26.5	13	22	17.5	20	15	17.5	14	25	19.5	27	33	30	19	9	14	26	35	30.5
SIAA1	AT1G56650	AT1G56650	14	254	2	NA	NA	protein_coding	PAP1 (PRODUCTION OF ANTHOCYANIN PIGMENT 1); DNA binding / transcription factor	Encodes a putative MYB domain containing transcription factor involved in anthocyanin metabolism and radical scavenging. Essential for the sucrose-mediated expression of the dihydroflavonol reductase gene.	PRODUCTION OF ANTHOCYANIN PIGMENT 1 (PAP1); FUNCTIONS IN: transcription factor activity, DNA binding; INVOLVED IN: in 8 processes; EXPRESSED IN: 9 plant structures; EXPRESSED DURING: 4 anthesis, LP.04 four leaves visible, C globular stage; CONTAINS InterPro DOMAIN/s: SANT, DNA-binding (InterPro:IPR001005), Homeodomain-like (InterPro:IPR009057), Myb, DNA-binding (InterPro:IPR014778), Myb-type HTH …	---	---	---	GO:0003677 | GO:0003700 | GO:0003700	DNA binding | transcription factor activity | transcription factor activity	Communication:501714663 | Publication:501715000|PMID:15807784 | Publication:1345963|PMID:11118137	GO:0006355 | GO:0009651 | GO:0009718 | GO:0009745 | GO:0009753 | GO:0019430 | GO:0031540 | GO:0046283	regulation of transcription, DNA-dependent | response to salt stress | anthocyanin biosynthetic process | sucrose mediated signaling | response to jasmonic acid stimulus | removal of superoxide radicals | regulation of anthocyanin biosynthetic process | anthocyanin metabolic process	Publication:1979|PMID:9839469 | Publication:501718564|PMID:16463103 | Publication:501718035|PMID:16299184 | Publication:501718035|PMID:16299184 | Publication:501718564|PMID:16463103 | Publication:501714947|PMID:15834789 | Publication:501723507|PMID:18036197 | Publication:501680866	SIAA1	914	41	43	42	61	74	67.5	33	37	35	28	37	32.5	30	31	30.5	10	13	11.5	31	35	33	17	19	18	47	42	44.5
GPT2	AT1G61800	AT1G61800	14	41	1	AT1G61800	1	protein_coding	GPT2; antiporter/ glucose-6-phosphate transmembrane transporter	glucose6-Phosphate/phosphate transporter 2	GPT2; FUNCTIONS IN: antiporter activity, glucose-6-phosphate transmembrane transporter activity; INVOLVED IN: hexose phosphate transport, response to sucrose stimulus, response to glucose stimulus; LOCATED IN: plasma membrane; EXPRESSED IN: 16 plant structures; EXPRESSED DURING: 10 growth stages; CONTAINS InterPro DOMAIN/s: Protein of unknown function DUF6, transmembrane (InterPro:IPR000620), Tpt…	GO:0005886	plasma membrane	Publication:501720626|PMID:17151019	GO:0015152 | GO:0015297 | GO:0015297	glucose-6-phosphate transmembrane transporter activity | antiporter activity | antiporter activity	Communication:501714663 | Communication:1674994 | Communication:1674994	GO:0009624 | GO:0009744 | GO:0009749 | GO:0015712	response to nematode | response to sucrose stimulus | response to glucose stimulus | hexose phosphate transport	Publication:501730592|PMID:19487386 | Publication:501718563|PMID:16463203 | Publication:501718563|PMID:16463203 | Communication:501714663	GPT2	1569	26	29	27.5	6	3	4.5	0	6	3	7	5	6	3	9	6	15	24	19.5	14	10	12	2	4	3	44	58	51
AT1G64380	AT1G64380	AT1G64380	14	256	1	NA	NA	protein_coding	AP2 domain-containing transcription factor, putative	encodes a member of the DREB subfamily A-6 of ERF/AP2 transcription factor family. The protein contains one AP2 domain. There are 8 members in this subfamily including RAP2.4.	AP2 domain-containing transcription factor, putative; FUNCTIONS IN: transcription factor activity, DNA binding; INVOLVED IN: response to chitin, regulation of transcription, DNA-dependent; LOCATED IN: nucleus; EXPRESSED IN: 22 plant structures; EXPRESSED DURING: 11 growth stages; CONTAINS InterPro DOMAIN/s: DNA-binding, integrase-type (InterPro:IPR016177), Pathogenesis-related transcriptional fac…	GO:0005634	nucleus	Communication:501714663	GO:0003677 | GO:0003700 | GO:0003700	DNA binding | transcription factor activity | transcription factor activity	Communication:501714663 | Communication:501714663 | Publication:1345963|PMID:11118137	GO:0006355 | GO:0010200	regulation of transcription, DNA-dependent | response to chitin	Communication:501714663 | Publication:501722879|PMID:17722694	AT1G64380	1528	16	31	23.5	30	32	31	113	120	116.5	30	49	39.5	35	74	54.5	51	65	58	43	55	49	128	78	103	46	67	56.5
AT1G67900	AT1G67900	AT1G67900	14	57	4	AT1G67900	4	protein_coding	phototropic-responsive NPH3 family protein	---	phototropic-responsive NPH3 family protein; FUNCTIONS IN: protein binding, signal transducer activity; INVOLVED IN: response to light stimulus; LOCATED IN: cellular_component unknown; EXPRESSED IN: cultured cell; CONTAINS InterPro DOMAIN/s: NPH3 (InterPro:IPR004249), BTB/POZ fold (InterPro:IPR011333); BEST Arabidopsis thaliana protein match is: phototropic-responsive NPH3 family protein (TAIR:AT3…	GO:0005575	cellular_component	Communication:1345790	GO:0004871 | GO:0004871 | GO:0005515	signal transducer activity | signal transducer activity | protein binding	Communication:501714663 | AnalysisReference:501730468 | AnalysisReference:501730468	GO:0009416 | GO:0009416	response to light stimulus | response to light stimulus	Communication:501714663 | AnalysisReference:501730468	AT1G67900	2713	877	1032	954.5	2697	2305	2501	875	885	880	2645	4081	3363	3311	4998	4154.5	2610	4179	3394.5	8853	11000	9926.5	14818	13479	14148.5	1242	1376	1309
AT1G68670	AT1G68670	AT1G68670	14	260	1	NA	NA	protein_coding	myb family transcription factor	---	myb family transcription factor; FUNCTIONS IN: transcription factor activity, DNA binding; INVOLVED IN: regulation of transcription; EXPRESSED IN: 23 plant structures; EXPRESSED DURING: 13 growth stages; CONTAINS InterPro DOMAIN/s: Homeodomain-like (InterPro:IPR009057), Myb, DNA-binding (InterPro:IPR014778), Myb-type HTH DNA-binding domain (InterPro:IPR017930), Myb-like DNA-binding region, SHAQKY…	---	---	---	GO:0003677 | GO:0003700	DNA binding | transcription factor activity	Publication:1345963|PMID:11118137 | Publication:1345963|PMID:11118137	GO:0045449	regulation of transcription	Publication:1345963|PMID:11118137	AT1G68670	1583	526	666	596	1131	951	1041	1123	1114	1118.5	702	1030	866	916	1194	1055	684	1021	852.5	1194	1421	1307.5	924	747	835.5	892	1096	994
BEE3	AT1G73830	AT1G73830	14	265	5	NA	NA	protein_coding	BEE3 (BR ENHANCED EXPRESSION 3); DNA binding / transcription factor	---	BR ENHANCED EXPRESSION 3 (BEE3); FUNCTIONS IN: transcription factor activity, DNA binding; INVOLVED IN: regulation of transcription; LOCATED IN: nucleus; EXPRESSED IN: 18 plant structures; EXPRESSED DURING: 10 growth stages; CONTAINS InterPro DOMAIN/s: Basic helix-loop-helix dimerisation region bHLH (InterPro:IPR001092), Helix-loop-helix DNA-binding (InterPro:IPR011598); BEST Arabidopsis thaliana…	GO:0005634	nucleus	AnalysisReference:501730468	GO:0003677 | GO:0003700 | GO:0003700	DNA binding | transcription factor activity | transcription factor activity	Communication:501714663 | Publication:1345963|PMID:11118137 | Publication:501705886|PMID:12679534	GO:0045449	regulation of transcription	Publication:1345963|PMID:11118137	BEE3	1082	69	70	69.5	83	60	71.5	83	76	79.5	62	75	68.5	98	110	104	178	260	219	193	166	179.5	241	199	220	85	76	80.5
NR1	AT1G77760	AT1G77760	14	72	2	AT1G77760	2	protein_coding	NIA1 (NITRATE REDUCTASE 1); nitrate reductase	Encodes the cytosolic minor isoform of nitrate reductase (NR). Involved in the first step of nitrate assimilation, it contributes about 15% of the nitrate reductase activity in shoots. Similar to molybdopterin oxidoreductases at the N-terminus, and to FAD/NAD-binding cytochrome reductases at the C-terminus. Cofactors: FAD, heme iron (cytochrome B-557), and molybdenum-pterin.	NITRATE REDUCTASE 1 (NIA1); FUNCTIONS IN: nitrate reductase activity; INVOLVED IN: nitrate assimilation, nitric oxide biosynthetic process, response to light stimulus; LOCATED IN: cytosol; EXPRESSED IN: 24 plant structures; EXPRESSED DURING: 13 growth stages; CONTAINS InterPro DOMAIN/s: Cytochrome b5, heme-binding site (InterPro:IPR018506), Nitrate reductase NADH dependant (InterPro:IPR012137), F…	GO:0005829	cytosol	Publication:501712977|PMID:15012211	GO:0008940	nitrate reductase activity	Publication:5194|PMID:8510658	GO:0006809 | GO:0009416 | GO:0042128	nitric oxide biosynthetic process | response to light stimulus | nitrate assimilation	Publication:501682465|PMID:0012446847 | Publication:501716328|PMID:15908593 | Publication:5194|PMID:8510658	NR1	3034	2102	2591	2346.5	11603	7308	9455.5	26252	24470	25361	9647	14139	11893	7625	8410	8017.5	8323	11253	9788	2217	1690	1953.5	2229	2230	2229.5	6083	8887	7485
MYB7	AT2G16720	AT2G16720	14	274	3	NA	NA	protein_coding	MYB7 (MYB DOMAIN PROTEIN 7); DNA binding / transcription factor	Encodes a member of MYB3R- and R2R3- type MYB- encoding genes	MYB DOMAIN PROTEIN 7 (MYB7); FUNCTIONS IN: transcription factor activity, DNA binding; INVOLVED IN: in 8 processes; EXPRESSED IN: 18 plant structures; EXPRESSED DURING: 8 growth stages; CONTAINS InterPro DOMAIN/s: SANT, DNA-binding (InterPro:IPR001005), Homeodomain-like (InterPro:IPR009057), Myb, DNA-binding (InterPro:IPR014778), Myb-type HTH DNA-binding domain (InterPro:IPR017930), Homeodomain-r…	---	---	---	GO:0003677 | GO:0003700	DNA binding | transcription factor activity	Communication:501714663 | Publication:1345963|PMID:11118137	GO:0006355 | GO:0009651 | GO:0009723 | GO:0009737 | GO:0009739 | GO:0009751 | GO:0009753 | GO:0046686	regulation of transcription, DNA-dependent | response to salt stress | response to ethylene stimulus | response to abscisic acid stimulus | response to gibberellin stimulus | response to salicylic acid stimulus | response to jasmonic acid stimulus | response to cadmium ion	Publication:1979|PMID:9839469 | Publication:501718564|PMID:16463103 | Publication:501718564|PMID:16463103 | Publication:501718564|PMID:16463103 | Publication:501718564|PMID:16463103 | Publication:501718564|PMID:16463103 | Publication:501718564|PMID:16463103 | Publication:501718564|PMID:16463103	MYB7	980	120	151	135.5	35	29	32	33	32	32.5	24	14	19	18	22	20	12	11	11.5	152	179	165.5	53	40	46.5	105	114	109.5
HB6	AT2G22430	AT2G22430	14	279	4	NA	NA	protein_coding	ATHB6; DNA binding / protein binding / sequence-specific DNA binding / transcription activator/ transcription factor	Encodes a homeodomain leucine zipper class I (HD-Zip I) protein that is a target of the protein phosphatase ABI1 and regulates hormone responses in Arabidopsis.	ATHB6; FUNCTIONS IN: protein binding, transcription factor activity, sequence-specific DNA binding, transcription activator activity, DNA binding; INVOLVED IN: response to water deprivation, positive regulation of transcription, negative regulation of abscisic acid mediated signaling, abscisic acid mediated signaling, regulation of transcription, DNA-dependent; LOCATED IN: nucleus; EXPRESSED IN: …	GO:0005634 | GO:0005634	nucleus | nucleus	AnalysisReference:501730468 | Communication:501714663	GO:0003677 | GO:0003677 | GO:0003700 | GO:0003700 | GO:0005515 | GO:0005515 | GO:0016563 | GO:0043565	DNA binding | DNA binding | transcription factor activity | transcription factor activity | protein binding | protein binding | transcription activator activity | sequence-specific DNA binding	Publication:501681575|PMID:12065416 | Publication:501681575|PMID:12065416 | Publication:501681575|PMID:12065416 | Publication:1345963|PMID:11118137 | Publication:501681575|PMID:12065416 | Publication:501681575|PMID:12065416 | Publication:501717432|PMID:16055682 | Publication:501680370|PMID:11247607	GO:0006355 | GO:0009414 | GO:0009738 | GO:0009788 | GO:0045941	regulation of transcription, DNA-dependent | response to water deprivation | abscisic acid mediated signaling | negative regulation of abscisic acid mediated signaling | positive regulation of transcription	Communication:501714663 | Publication:1078|PMID:10527431 | Publication:501681575|PMID:12065416 | Publication:501681575|PMID:12065416 | Publication:501717432|PMID:16055682	HB6	1529	512	598	555	1081	932	1006.5	1187	1184	1185.5	1137	1262	1199.5	1378	1722	1550	2048	2741	2394.5	1777	2149	1963	1682	1398	1540	1569	1894	1731.5
AT2G29500	AT2G29500	AT2G29500	14	90	1	AT2G29500	1	protein_coding	17.6 kDa class I small heat shock protein (HSP17.6B-CI)	---	17.6 kDa class I small heat shock protein (HSP17.6B-CI); FUNCTIONS IN: molecular_function unknown; INVOLVED IN: response to oxidative stress, response to cyclopentenone, response to high light intensity, response to hydrogen peroxide, response to heat; EXPRESSED IN: 17 plant structures; EXPRESSED DURING: 9 growth stages; CONTAINS InterPro DOMAIN/s: Heat shock protein Hsp20 (InterPro:IPR002068), H…	---	---	---	GO:0003674	molecular_function	Communication:1345790	GO:0006979 | GO:0009408 | GO:0009408 | GO:0009644 | GO:0042542	response to oxidative stress | response to heat | response to heat | response to high light intensity | response to hydrogen peroxide	Publication:501714511|PMID:15634198 | Communication:501714663 | Publication:501720058|PMID:17059409 | Publication:501720058|PMID:17059409 | Publication:501720058|PMID:17059409	AT2G29500	715	124	212	168	233	162	197.5	115	77	96	30	72	51	30	44	37	38	78	58	155	94	124.5	47	47	47	76	94	85
TCH3	AT2G41100	AT2G41100	14	108	1	AT2G41100	1	protein_coding	TCH3 (TOUCH 3); calcium ion binding	encodes a calmodulin-like protein, with six potential calcium binding domains. Calcium binding shown by Ca(2+)-specific shift in electrophoretic mobility. Expression induced by touch and darkness. Expression may also be developmentally controlled. Expression in growing regions of roots, vascular tissue, root/shoot junctions, trichomes, branch points of the shoot, and regions of siliques and flowe…	TOUCH 3 (TCH3); FUNCTIONS IN: calcium ion binding; INVOLVED IN: thigmotropism, response to temperature stimulus, response to mechanical stimulus, response to absence of light; LOCATED IN: plasma membrane; EXPRESSED IN: 26 plant structures; EXPRESSED DURING: 14 growth stages; CONTAINS InterPro DOMAIN/s: EF-HAND 1 (InterPro:IPR018247), EF-HAND 2 (InterPro:IPR018249), EF-Hand type (InterPro:IPR01199…	GO:0005886	plasma membrane	Publication:501720626|PMID:17151019	GO:0005509	calcium ion binding	Publication:4671|PMID:7827491	GO:0009266 | GO:0009612 | GO:0009646 | GO:0009652	response to temperature stimulus | response to mechanical stimulus | response to absence of light | thigmotropism	Publication:1547126 | Publication:4671|PMID:7827491 | Publication:4671|PMID:7827491 | Publication:4240|PMID:8564305	TCH3	1400	2908	2352	2630	3067	3497	3282	4180	4735	4457.5	3705	4909	4307	1807	2960	2383.5	1464	1873	1668.5	2877	2845	2861	3313	3266	3289.5	3669	4623	4146
PRXCA	AT3G49110	AT3G49110	14	142	2	AT3G49110	2	protein_coding	PRXCA (PEROXIDASE CA); peroxidase	Class III peroxidase Perx33. Expressed in roots. Located in the cell wall. Involved in cell elongation. Expression activated by light. May play a role in generating H2O2 during defense response.	PEROXIDASE CA (PRXCA); FUNCTIONS IN: peroxidase activity; INVOLVED IN: oxygen and reactive oxygen species metabolic process, defense response to fungus, defense response to bacterium, response to light stimulus, unidimensional cell growth; LOCATED IN: vacuole, plant-type cell wall; EXPRESSED IN: stem, root; CONTAINS InterPro DOMAIN/s: Haem peroxidase (InterPro:IPR010255), Plant peroxidase (InterP…	GO:0005773 | GO:0009505 | GO:0009505	vacuole | plant-type cell wall | plant-type cell wall	Publication:501714874|PMID:15539469 | Publication:501718084|PMID:16284776 | Publication:501721524|PMID:17526915	GO:0004601 | GO:0004601	peroxidase activity | peroxidase activity	Publication:501719821|PMID:16889645 | Communication:501714663	GO:0006800 | GO:0009416 | GO:0009826 | GO:0042742 | GO:0050832	oxygen and reactive oxygen species metabolic process | response to light stimulus | unidimensional cell growth | defense response to bacterium | defense response to fungus	Publication:501719821|PMID:16889645 | Publication:501718084|PMID:16284776 | Publication:501718084|PMID:16284776 | Publication:501719821|PMID:16889645 | Publication:501719821|PMID:16889645	PRXCA	1365	25	22	23.5	44	20	32	41	33	37	29	28	28.5	46	25	35.5	72	74	73	34	40	37	67	66	66.5	33	41	37
WRKY18	AT4G31800	AT4G31800	14	347	2	NA	NA	protein_coding	WRKY18; transcription factor	Pathogen-induced transcription factor. Binds W-box sequences in vitro. Forms protein complexes with itself and with WRKY40 and WRKY60. Constitutive expression of WRKY18 enhanced resistance to P. syringae, but its coexpression with WRKY40 or WRKY60 made plants more susceptible to both P. syringae and B. cinerea. WRKY18, WRKY40, and WRKY60 have partially redundant roles in response to the hemibiotr…	WRKY18; FUNCTIONS IN: transcription factor activity; INVOLVED IN: in 7 processes; LOCATED IN: nucleus; EXPRESSED IN: 24 plant structures; EXPRESSED DURING: 13 growth stages; CONTAINS InterPro DOMAIN/s: DNA-binding WRKY (InterPro:IPR003657); BEST Arabidopsis thaliana protein match is: WRKY60; transcription factor (TAIR:AT2G25000.1); Has 1943 Blast hits to 1667 proteins in 114 species: Archae - 0; …	GO:0005634	nucleus	Publication:501718948|PMID:16603654	GO:0003700 | GO:0003700 | GO:0003700 | GO:0003700 | GO:0003700 | GO:0003700 | GO:0003700	transcription factor activity | transcription factor activity | transcription factor activity | transcription factor activity | transcription factor activity | transcription factor activity | transcription factor activity	Publication:501722638|PMID:17096590 | Publication:501681548|PMID:12068113 | Communication:501714663 | Publication:492|PMID:10785665 | Communication:1674991 | Publication:1345963|PMID:11118137 | Publication:492|PMID:10785665	GO:0006355 | GO:0009751 | GO:0010200 | GO:0031347 | GO:0031347 | GO:0042742 | GO:0050691 | GO:0050832	regulation of transcription, DNA-dependent | response to salicylic acid stimulus | response to chitin | regulation of defense response | regulation of defense response | defense response to bacterium | regulation of defense response to virus by host | defense response to fungus	Communication:501714663 | Publication:501683335|PMID:12602888 | Publication:501722879|PMID:17722694 | Publication:501681548|PMID:12068113 | Publication:501722638|PMID:17096590 | Publication:501683335|PMID:12602888 | Publication:501722637|PMID:17185563 | Publication:501718948|PMID:16603654	WRKY18	1245	89	68	78.5	208	197	202.5	67	71	69	96	168	132	73	106	89.5	95	140	117.5	167	213	190	105	80	92.5	93	94	93.5
JKD	AT5G03150	AT5G03150	14	352	2	NA	NA	protein_coding	JKD (JACKDAW); nucleic acid binding / protein binding / protein homodimerization/ transcription factor/ zinc ion binding	JKD is a nuclear-localized putative transcription factor with three zinc finger domains. jkd mutants show a number of root patterning defects including ectopic periclinal divisions in the cortex, increased cell numbers in the cortical and epidermal layers, a disrupted QC marker expression pattern, and disorganized QC and columella cells. jkd mutants also have a reduced number of meristematic cell…	JACKDAW (JKD); FUNCTIONS IN: protein binding, transcription factor activity, protein homodimerization activity, zinc ion binding, nucleic acid binding; INVOLVED IN: regulation of meristem growth, regulation of cell division, root development, regulation of transcription; LOCATED IN: intracellular; EXPRESSED IN: 6 plant structures; EXPRESSED DURING: 6 growth stages; CONTAINS InterPro DOMAIN/s: Zin…	GO:0005622	intracellular	AnalysisReference:501730468	GO:0003676 | GO:0003700 | GO:0005515 | GO:0005515 | GO:0005515 | GO:0008270 | GO:0042803	nucleic acid binding | transcription factor activity | protein binding | protein binding | protein binding | zinc ion binding | protein homodimerization activity	Communication:501714663 | Publication:1345963|PMID:11118137 | Publication:501723231|PMID:17785527 | Publication:501723231|PMID:17785527 | Publication:501723231|PMID:17785527 | Communication:501714663 | Publication:501723231|PMID:17785527	GO:0010075 | GO:0045449 | GO:0048364 | GO:0051302	regulation of meristem growth | regulation of transcription | root development | regulation of cell division	Publication:501723231|PMID:17785527 | Publication:1345963|PMID:11118137 | Publication:501723231|PMID:17785527 | Publication:501723231|PMID:17785527	JKD	2046	25	22	23.5	30	21	25.5	55	72	63.5	49	43	46	61	63	62	68	64	66	57	61	59	132	109	120.5	52	53	52.5
DOT3	AT5G10250	AT5G10250	14	186	1	AT5G10250	1	protein_coding	DOT3 (DEFECTIVELY ORGANIZED TRIBUTARIES 3); protein binding / signal transducer	Encodes a protein with an N-terminal BTB/POZ domain and a C-terminal NPH3 family domain. dot3 mutants have defects in shoot and primary root growth and produce an aberrant parallel venation pattern in juvenile leaves.	DEFECTIVELY ORGANIZED TRIBUTARIES 3 (DOT3); FUNCTIONS IN: protein binding, signal transducer activity; INVOLVED IN: in 6 processes; LOCATED IN: cellular_component unknown; EXPRESSED IN: leaf primordium; CONTAINS InterPro DOMAIN/s: NPH3 (InterPro:IPR004249), BTB/POZ fold (InterPro:IPR011333), BTB/POZ-like (InterPro:IPR000210); BEST Arabidopsis thaliana protein match is: NPH3 (NON-PHOTOTROPIC HYPOC…	GO:0005575	cellular_component	Communication:1345790	GO:0004871 | GO:0004871 | GO:0005515	signal transducer activity | signal transducer activity | protein binding	Communication:501714663 | AnalysisReference:501730468 | AnalysisReference:501730468	GO:0009416 | GO:0010087 | GO:0010305 | GO:0010588 | GO:0048367	response to light stimulus | phloem or xylem histogenesis | leaf vascular tissue pattern formation | cotyledon vascular tissue pattern formation | shoot development	Communication:501714663 | Publication:501727292|PMID:18643975 | Publication:501727292|PMID:18643975 | Publication:501727292|PMID:18643975 | Publication:501727292|PMID:18643975	DOT3	1824	296	327	311.5	434	323	378.5	292	270	281	285	366	325.5	324	385	354.5	228	337	282.5	425	457	441	330	315	322.5	223	277	250
BNQ2	AT5G15160	AT5G15160	14	191	3	AT5G15160	3	protein_coding	bHLH family protein	---	bHLH family protein; FUNCTIONS IN: transcription factor activity, DNA binding; INVOLVED IN: regulation of transcription; LOCATED IN: vacuole; EXPRESSED IN: 19 plant structures; EXPRESSED DURING: 12 growth stages; CONTAINS InterPro DOMAIN/s: Basic helix-loop-helix dimerisation region bHLH (InterPro:IPR001092); BEST Arabidopsis thaliana protein match is: PRE1 (PACLOBUTRAZOL RESISTANCE1); DNA bindin…	GO:0005773	vacuole	Publication:501714874|PMID:15539469	GO:0003677 | GO:0003700	DNA binding | transcription factor activity	Communication:501714663 | Publication:501705886|PMID:12679534	GO:0045449	regulation of transcription	AnalysisReference:501730468	BNQ2	601	7	5	6	7	6	6.5	17	16	16.5	14	6	10	18	11	14.5	32	22	27	19	18	18.5	40	52	46	10	22	16
ESE3	AT5G25190	AT5G25190	14	365	5	NA	NA	protein_coding	ethylene-responsive element-binding protein, putative	encodes a member of the ERF (ethylene response factor) subfamily B-6 of ERF/AP2 transcription factor family. The protein contains one AP2 domain. There are 12 members in this subfamily including RAP2.11.	ethylene-responsive element-binding protein, putative; FUNCTIONS IN: transcription factor activity, DNA binding; INVOLVED IN: ethylene mediated signaling pathway, regulation of transcription, DNA-dependent; LOCATED IN: nucleus; EXPRESSED IN: 19 plant structures; EXPRESSED DURING: 12 growth stages; CONTAINS InterPro DOMAIN/s: DNA-binding, integrase-type (InterPro:IPR016177), Pathogenesis-related t…	GO:0005634	nucleus	Communication:501714663	GO:0003677 | GO:0003700 | GO:0003700 | GO:0003700	DNA binding | transcription factor activity | transcription factor activity | transcription factor activity	Communication:501714663 | Communication:501714663 | Publication:2298|PMID:9687012 | Publication:1345963|PMID:11118137	GO:0006355 | GO:0009873	regulation of transcription, DNA-dependent | ethylene mediated signaling pathway	Communication:501714663 | Publication:2298|PMID:9687012	ESE3	856	10	8	9	46	34	40	15	22	18.5	62	81	71.5	70	87	78.5	47	92	69.5	63	146	104.5	618	642	630	24	23	23.5
KCS20	AT5G43760	AT5G43760	14	195	1	AT5G43760	1	protein_coding	KCS20 (3-KETOACYL-COA SYNTHASE 20); fatty acid elongase	Encodes KCS20, a member of the 3-ketoacyl-CoA synthase family involved in the biosynthesis of VLCFA (very long chain fatty acids).	3-KETOACYL-COA SYNTHASE 20 (KCS20); FUNCTIONS IN: fatty acid elongase activity; INVOLVED IN: response to light stimulus, response to cold, response to osmotic stress; LOCATED IN: membrane; EXPRESSED IN: 28 plant structures; EXPRESSED DURING: 13 growth stages; CONTAINS InterPro DOMAIN/s: Thiolase-like (InterPro:IPR016039), Very-long-chain 3-ketoacyl-CoA synthase (InterPro:IPR012392), FAE1/Type III…	GO:0016020	membrane	AnalysisReference:501730468	GO:0009922	fatty acid elongase activity	Publication:501712777|PMID:15277688	GO:0009409 | GO:0009416	response to cold | response to light stimulus	Publication:501724806|PMID:18465198 | Publication:501724806|PMID:18465198	KCS20	1841	4392	5948	5170	9787	8206	8996.5	7950	8349	8149.5	5429	7190	6309.5	4781	5902	5341.5	4143	5421	4782	7866	8124	7995	5390	4442	4916	5425	6395	5910
AT5G44260	AT5G44260	AT5G44260	14	375	5	NA	NA	protein_coding	zinc finger (CCCH-type) family protein	---	zinc finger (CCCH-type) family protein; FUNCTIONS IN: transcription factor activity, nucleic acid binding; EXPRESSED IN: 9 plant structures; EXPRESSED DURING: LP.06 six leaves visible, 4 anthesis, C globular stage, petal differentiation and expansion stage; CONTAINS InterPro DOMAIN/s: Zinc finger, CCCH-type (InterPro:IPR000571); BEST Arabidopsis thaliana protein match is: SOM (SOMNUS); nucleic ac…	---	---	---	GO:0003676 | GO:0003700	nucleic acid binding | transcription factor activity	Communication:501714663 | Publication:1345963|PMID:11118137	---	---	---	AT5G44260	1600	11	6	8.5	21	10	15.5	20	23	21.5	16	33	24.5	33	51	42	119	187	153	61	73	67	107	106	106.5	29	30	29.5
COL5	AT5G57660	AT5G57660	14	213	6	AT5G57660	6	protein_coding	zinc finger (B-box type) family protein	---	zinc finger (B-box type) family protein; FUNCTIONS IN: transcription factor activity, zinc ion binding; INVOLVED IN: regulation of transcription; LOCATED IN: intracellular; EXPRESSED IN: 22 plant structures; EXPRESSED DURING: 13 growth stages; CONTAINS InterPro DOMAIN/s: CCT domain (InterPro:IPR010402), Zinc finger, B-box (InterPro:IPR000315); BEST Arabidopsis thaliana protein match is: zinc fing…	GO:0005622	intracellular	AnalysisReference:501730468	GO:0003700 | GO:0008270	transcription factor activity | zinc ion binding	Publication:1345963|PMID:11118137 | Communication:501714663	GO:0045449	regulation of transcription	Publication:1345963|PMID:11118137	COL5	1437	1229	1377	1303	2300	1908	2104	2932	2970	2951	2317	3258	2787.5	3267	3996	3631.5	3483	4727	4105	5463	6537	6000	5266	4152	4709	4162	4930	4546
GA2OX6	AT1G02400	AT1G02400	13	3	4	AT1G02400	4	protein_coding	GA2OX6 (GIBBERELLIN 2-OXIDASE 6); gibberellin 2-beta-dioxygenase	Encodes a gibberellin 2-oxidase.	GIBBERELLIN 2-OXIDASE 6 (GA2OX6); FUNCTIONS IN: gibberellin 2-beta-dioxygenase activity; INVOLVED IN: response to red or far red light, gibberellin catabolic process; EXPRESSED IN: 19 plant structures; EXPRESSED DURING: 8 growth stages; CONTAINS InterPro DOMAIN/s: 2OG-Fe(II) oxygenase (InterPro:IPR005123); BEST Arabidopsis thaliana protein match is: ATGA2OX4 (ARABIDOPSIS THALIANA GIBBERELLIN 2-OX…	---	---	---	GO:0045543	gibberellin 2-beta-dioxygenase activity	Publication:501728683|PMID:18805991	GO:0009639 | GO:0045487	response to red or far red light | gibberellin catabolic process	Publication:501720219|PMID:17010113 | Publication:501728683|PMID:18805991	GA2OX6	1339	16	16	16	13	15	14	14	15	14.5	21	28	24.5	28	38	33	41	48	44.5	36	39	37.5	376	345	360.5	27	34	30.5
GH3.17	AT1G28130	AT1G28130	13	894	2	NA	NA	protein_coding	GH3.17; indole-3-acetic acid amido synthetase	encodes an IAA-amido synthase that conjugates Asp and other amino acids to auxin in vitro. Lines carrying insertions in this gene are hypersensitive to auxin.	GH3.17; FUNCTIONS IN: indole-3-acetic acid amido synthetase activity; INVOLVED IN: auxin homeostasis, response to auxin stimulus; LOCATED IN: nucleus, cytoplasm; EXPRESSED IN: 15 plant structures; EXPRESSED DURING: 6 growth stages; CONTAINS InterPro DOMAIN/s: GH3 auxin-responsive promoter (InterPro:IPR004993); BEST Arabidopsis thaliana protein match is: DFL1 (DWARF IN LIGHT 1); indole-3-acetic ac…	GO:0005634 | GO:0005737	nucleus | cytoplasm	Publication:501714452|PMID:15610358 | Publication:501714452|PMID:15610358	GO:0010279	indole-3-acetic acid amido synthetase activity	Publication:501714420|PMID:15659623	GO:0009733 | GO:0009733 | GO:0010252	response to auxin stimulus | response to auxin stimulus | auxin homeostasis	Publication:501714420|PMID:15659623 | Communication:501714663 | Publication:501714420|PMID:15659623	GH3.17	2212	538	554	546	783	606	694.5	522	545	533.5	509	581	545	678	622	650	316	344	330	1364	1353	1358.5	1226	1009	1117.5	1014	1040	1027
AT1G76350	AT1G76350	AT1G76350	13	268	1	NA	NA	protein_coding	RWP-RK domain-containing protein	---	RWP-RK domain-containing protein; FUNCTIONS IN: transcription factor activity; INVOLVED IN: regulation of transcription; EXPRESSED IN: 23 plant structures; EXPRESSED DURING: 13 growth stages; CONTAINS InterPro DOMAIN/s: Octicosapeptide/Phox/Bem1p (InterPro:IPR000270), Plant regulator RWP-RK (InterPro:IPR003035); BEST Arabidopsis thaliana protein match is: RWP-RK domain-containing protein (TAIR:AT…	---	---	---	GO:0003700	transcription factor activity	Publication:1345963|PMID:11118137	GO:0045449	regulation of transcription	Publication:1345963|PMID:11118137	AT1G76350	2908	612	803	707.5	797	724	760.5	473	517	495	586	850	718	674	986	830	532	733	632.5	1001	990	995.5	786	594	690	803	906	854.5
OZF1	AT2G19810	AT2G19810	13	276	2	NA	NA	protein_coding	zinc finger (CCCH-type) family protein	---	zinc finger (CCCH-type) family protein; FUNCTIONS IN: transcription factor activity, nucleic acid binding; INVOLVED IN: regulation of transcription; EXPRESSED IN: 22 plant structures; EXPRESSED DURING: 13 growth stages; CONTAINS InterPro DOMAIN/s: Zinc finger, CCCH-type (InterPro:IPR000571); BEST Arabidopsis thaliana protein match is: zinc finger (CCCH-type) family protein (TAIR:AT4G29190.1); Has…	---	---	---	GO:0003676 | GO:0003700	nucleic acid binding | transcription factor activity	Communication:501714663 | Publication:1345963|PMID:11118137	GO:0045449	regulation of transcription	Publication:1345963|PMID:11118137	OZF1	1546	64	84	74	133	84	108.5	90	67	78.5	103	129	116	142	169	155.5	189	246	217.5	112	95	103.5	168	150	159	80	117	98.5
RSM1	AT2G21650	AT2G21650	13	85	3	AT2G21650	3	protein_coding	MEE3 (MATERNAL EFFECT EMBRYO ARREST 3); DNA binding / transcription factor	---	MATERNAL EFFECT EMBRYO ARREST 3 (MEE3); FUNCTIONS IN: transcription factor activity, DNA binding; INVOLVED IN: embryonic development ending in seed dormancy, regulation of transcription, DNA-dependent; EXPRESSED IN: 23 plant structures; EXPRESSED DURING: 12 growth stages; CONTAINS InterPro DOMAIN/s: SANT, DNA-binding (InterPro:IPR001005), Molecular chaperone, heat shock protein, Hsp40, DnaJ (Inte…	---	---	---	GO:0003677 | GO:0003700 | GO:0003700	DNA binding | transcription factor activity | transcription factor activity	Communication:501714663 | Communication:501714663 | Publication:1345963|PMID:11118137	GO:0006355 | GO:0009793	regulation of transcription, DNA-dependent | embryonic development ending in seed dormancy	Communication:501714663 | Publication:501714637|PMID:15634699	RSM1	614	66	39	52.5	102	111	106.5	38	21	29.5	101	164	132.5	200	261	230.5	127	214	170.5	49	75	62	47	37	42	50	55	52.5
CYP734A1	AT2G26710	AT2G26710	13	498	3	NA	NA	protein_coding	BAS1 (PHYB ACTIVATION TAGGED SUPPRESSOR 1); oxygen binding / steroid hydroxylase	Encodes a member of the cytochrome p450 family that serves as a control point between multiple photoreceptor systems and brassinosteroid signal transduction. Involved in brassinolide metabolism. Mediates response to a variety of light signals including hypocotyl elongation and cotyledon expansion.	PHYB ACTIVATION TAGGED SUPPRESSOR 1 (BAS1); FUNCTIONS IN: steroid hydroxylase activity, oxygen binding; INVOLVED IN: response to light stimulus, brassinosteroid homeostasis, response to brassinosteroid stimulus, brassinosteroid metabolic process; LOCATED IN: endomembrane system; EXPRESSED IN: 12 plant structures; EXPRESSED DURING: 6 growth stages; CONTAINS InterPro DOMAIN/s: Cytochrome P450 (Inte…	GO:0012505	endomembrane system	AnalysisReference:501730133	GO:0008395 | GO:0019825	steroid hydroxylase activity | oxygen binding	Publication:882|PMID:10611382 | Communication:501714663	GO:0009416 | GO:0009741 | GO:0010268 | GO:0016131 | GO:0016131	response to light stimulus | response to brassinosteroid stimulus | brassinosteroid homeostasis | brassinosteroid metabolic process | brassinosteroid metabolic process	Publication:501715001|PMID:15773851 | Publication:501716542|PMID:15908602 | Publication:501716542|PMID:15908602 | Publication:501715001|PMID:15773851 | Publication:882|PMID:10611382	CYP734A1	1970	66	65	65.5	355	281	318	147	147	147	194	274	234	353	466	409.5	275	325	300	1039	1340	1189.5	880	772	826	190	171	180.5
NAC047	AT3G04070	AT3G04070	13	305	1	NA	NA	protein_coding	anac047 (Arabidopsis NAC domain containing protein 47); transcription factor	---	Arabidopsis NAC domain containing protein 47 (anac047); FUNCTIONS IN: transcription factor activity; INVOLVED IN: multicellular organismal development, regulation of transcription; LOCATED IN: cellular_component unknown; EXPRESSED IN: 16 plant structures; EXPRESSED DURING: 7 growth stages; CONTAINS InterPro DOMAIN/s: No apical meristem (NAM) protein (InterPro:IPR003441); BEST Arabidopsis thaliana…	GO:0005575	cellular_component	Communication:1345790	GO:0003700	transcription factor activity	Publication:1345963|PMID:11118137	GO:0007275 | GO:0045449	multicellular organismal development | regulation of transcription	Communication:501714663 | AnalysisReference:501730468	NAC047	1254	9	11	10	37	27	32	11	9	10	14	10	12	30	21	25.5	42	55	48.5	15	10	12.5	17	14	15.5	10	19	14.5
EDF3	AT3G25730	AT3G25730	13	313	1	NA	NA	protein_coding	AP2 domain-containing transcription factor, putative	---	AP2 domain-containing transcription factor, putative; FUNCTIONS IN: transcription factor activity; INVOLVED IN: regulation of transcription, DNA-dependent; LOCATED IN: chloroplast; EXPRESSED IN: cotyledon, hypocotyl, flower, root, seed; EXPRESSED DURING: petal differentiation and expansion stage; CONTAINS InterPro DOMAIN/s: DNA-binding, integrase-type (InterPro:IPR016177), Transcriptional factor …	GO:0009507	chloroplast	AnalysisReference:501730133	GO:0003700	transcription factor activity	Publication:1345963|PMID:11118137	GO:0006355	regulation of transcription, DNA-dependent	AnalysisReference:501730468	EDF3	1328	12	19	15.5	16	9	12.5	46	44	45	13	15	14	28	24	26	12	25	18.5	23	20	21.5	20	33	26.5	20	26	23
MYB55	AT4G01680	AT4G01680	13	332	2	NA	NA	protein_coding	MYB55 (myb domain protein 55); DNA binding / transcription factor	Encodes a putative transcription factor (MYB55).	myb domain protein 55 (MYB55); FUNCTIONS IN: transcription factor activity, DNA binding; INVOLVED IN: regulation of transcription; EXPRESSED IN: petal, inflorescence meristem, flower; EXPRESSED DURING: 4 anthesis, petal differentiation and expansion stage; CONTAINS InterPro DOMAIN/s: SANT, DNA-binding (InterPro:IPR001005), Homeodomain-like (InterPro:IPR009057), Myb, DNA-binding (InterPro:IPR01477…	---	---	---	GO:0003677 | GO:0003700	DNA binding | transcription factor activity	Communication:501714663 | Publication:1345963|PMID:11118137	GO:0045449	regulation of transcription	Publication:1345963|PMID:11118137	MYB55	1429	56	73	64.5	46	25	35.5	100	112	106	56	41	48.5	57	62	59.5	19	21	20	36	51	43.5	62	65	63.5	107	106	106.5
SAG21	AT4G02380	AT4G02380	13	150	1	AT4G02380	1	protein_coding	SAG21 (SENESCENCE-ASSOCIATED GENE 21)	Encodes AtLEA5 (late embryogenesis abundant like protein). Also known as SENESCENCE-ASSOCIATED GENE 21 (SAG21). Has a role on oxidative stress tolerance. mRNA levels are elevated in response to various stresses.	SENESCENCE-ASSOCIATED GENE 21 (SAG21); FUNCTIONS IN: molecular_function unknown; INVOLVED IN: embryonic development, response to reactive oxygen species, response to oxidative stress, response to cold, cellular response to water deprivation; EXPRESSED IN: 24 plant structures; EXPRESSED DURING: 12 growth stages; CONTAINS InterPro DOMAIN/s: Late embryogenesis abundant protein 3 (InterPro:IPR004926)…	---	---	---	GO:0003674	molecular_function	Communication:501683652	GO:0000302 | GO:0006979 | GO:0009409 | GO:0009409 | GO:0009790 | GO:0042631	response to reactive oxygen species | response to oxidative stress | response to cold | response to cold | embryonic development | cellular response to water deprivation	Publication:1276|PMID:10444084 | Publication:501720402|PMID:17092320 | Publication:501680321|PMID:11158529 | Publication:501717819|PMID:16258011 | Communication:501714663 | Publication:501720402|PMID:17092320	SAG21	698	373	549	461	852	603	727.5	6598	5360	5979	748	910	829	356	477	416.5	423	662	542.5	276	211	243.5	381	298	339.5	746	895	820.5
PFA-DSP4	AT4G03960	AT4G03960	13	1883	1	NA	NA	protein_coding	tyrosine specific protein phosphatase family protein	---	tyrosine specific protein phosphatase family protein; FUNCTIONS IN: phosphatase activity, protein tyrosine phosphatase activity, phosphoprotein phosphatase activity; INVOLVED IN: dephosphorylation; LOCATED IN: cellular_component unknown; EXPRESSED IN: 22 plant structures; EXPRESSED DURING: 13 growth stages; CONTAINS InterPro DOMAIN/s: Protein-tyrosine phosphatase, active site (InterPro:IPR016130)…	GO:0005575	cellular_component	Communication:1345790	GO:0004721 | GO:0004725 | GO:0016791	phosphoprotein phosphatase activity | protein tyrosine phosphatase activity | phosphatase activity	Communication:501714663 | AnalysisReference:501730468 | AnalysisReference:501730468	GO:0016311	dephosphorylation	AnalysisReference:501730468	PFA-DSP4	953	64	97	80.5	60	65	62.5	55	53	54	33	17	25	44	39	41.5	45	48	46.5	78	118	98	41	34	37.5	94	110	102
TCX2	AT4G14770	AT4G14770	13	335	1	NA	NA	protein_coding	TCX2 (TESMIN/TSO1-LIKE CXC 2); transcription factor	---	TESMIN/TSO1-LIKE CXC 2 (TCX2); FUNCTIONS IN: transcription factor activity; INVOLVED IN: regulation of transcription; LOCATED IN: chloroplast; EXPRESSED IN: 16 plant structures; EXPRESSED DURING: 9 growth stages; CONTAINS InterPro DOMAIN/s: Tesmin/TSO1-like, CXC (InterPro:IPR005172); BEST Arabidopsis thaliana protein match is: TSO1 (CHINESE FOR 'UGLY'); transcription factor (TAIR:AT3G22780.1); Ha…	GO:0009507	chloroplast	AnalysisReference:501730133	GO:0003700	transcription factor activity	Publication:1345963|PMID:11118137	GO:0045449	regulation of transcription	Publication:1345963|PMID:11118137	TCX2	2177	698	827	762.5	852	791	821.5	634	666	650	714	921	817.5	741	870	805.5	533	705	619	896	943	919.5	895	743	819	855	977	916
BT5	AT4G37610	AT4G37610	13	348	1	NA	NA	protein_coding	BT5 (BTB AND TAZ DOMAIN PROTEIN 5); protein binding / transcription regulator	BTB and TAZ domain protein. Located in cytoplasm and expressed in fruit, flower and leaves.	BTB AND TAZ DOMAIN PROTEIN 5 (BT5); FUNCTIONS IN: protein binding, transcription regulator activity; INVOLVED IN: response to auxin stimulus, response to chitin; LOCATED IN: cytoplasm; EXPRESSED IN: 24 plant structures; EXPRESSED DURING: 15 growth stages; CONTAINS InterPro DOMAIN/s: BTB/POZ (InterPro:IPR013069), Zinc finger, TAZ-type (InterPro:IPR000197), BTB/POZ fold (InterPro:IPR011333), Kelch …	GO:0005737	cytoplasm	Publication:501729424|PMID:19054356	GO:0005515 | GO:0030528	protein binding | transcription regulator activity	Communication:501714663 | Publication:603|PMID:10748221	GO:0009733 | GO:0010200	response to auxin stimulus | response to chitin	Publication:501729424|PMID:19054356 | Publication:501722879|PMID:17722694	BT5	1438	1270	967	1118.5	2381	2115	2248	349	318	333.5	771	1152	961.5	1245	1576	1410.5	959	1480	1219.5	1887	1989	1938	1940	1370	1655	1024	1030	1027
IAA4	AT5G43700	AT5G43700	13	372	5	NA	NA	protein_coding	ATAUX2-11 (AUXIN INDUCIBLE 2-11); DNA binding / transcription factor	Auxin inducible protein similar to transcription factors.	AUXIN INDUCIBLE 2-11 (ATAUX2-11); FUNCTIONS IN: transcription factor activity, DNA binding; INVOLVED IN: response to cyclopentenone, response to auxin stimulus, regulation of translation; LOCATED IN: nucleus, intracellular; EXPRESSED IN: 22 plant structures; EXPRESSED DURING: 13 growth stages; CONTAINS InterPro DOMAIN/s: Aux/IAA-ARF-dimerisation (InterPro:IPR011525), AUX/IAA protein (InterPro:IPR…	GO:0005622 | GO:0005634	intracellular | nucleus	Communication:501714663 | Publication:4968|PMID:8278386	GO:0003677 | GO:0003700	DNA binding | transcription factor activity	Publication:4968|PMID:8278386 | Publication:1345963|PMID:11118137	GO:0006417 | GO:0009733 | GO:0009733 | GO:0010583	regulation of translation | response to auxin stimulus | response to auxin stimulus | response to cyclopentenone	Communication:501714663 | Communication:501714663 | Publication:4306|PMID:7658471 | Publication:501724352|PMID:18334669	IAA4	1168	692	696	694	1098	890	994	1000	969	984.5	854	1151	1002.5	1160	1421	1290.5	1133	1585	1359	1630	1723	1676.5	2386	1972	2179	883	1019	951
HB52	AT5G53980	AT5G53980	13	382	2	NA	NA	protein_coding	ATHB52 (ARABIDOPSIS THALIANA HOMEOBOX PROTEIN 52); transcription factor	Encodes a homeodomain leucine zipper class I (HD-Zip I) protein.	ARABIDOPSIS THALIANA HOMEOBOX PROTEIN 52 (ATHB52); FUNCTIONS IN: transcription factor activity; INVOLVED IN: response to blue light, regulation of transcription, DNA-dependent, response to absence of light; LOCATED IN: nucleus; EXPRESSED IN: flower, root; EXPRESSED DURING: seedling growth; CONTAINS InterPro DOMAIN/s: Homeobox (InterPro:IPR001356), Homeobox, conserved site (InterPro:IPR017970), Ho…	GO:0005634 | GO:0005634	nucleus | nucleus	AnalysisReference:501730468 | Communication:501714663	GO:0003700	transcription factor activity	Publication:1345963|PMID:11118137	GO:0006355 | GO:0009637 | GO:0009646	regulation of transcription, DNA-dependent | response to blue light | response to absence of light	Communication:501714663 | Publication:501717432|PMID:16055682 | Publication:501717432|PMID:16055682	HB52	705	2	2	2	2	0	1	19	12	15.5	1	3	2	6	3	4.5	4	3	3.5	2	3	2.5	11	10	10.5	10	9	9.5
GH3.6	AT5G54510	AT5G54510	13	897	5	NA	NA	protein_coding	DFL1 (DWARF IN LIGHT 1); indole-3-acetic acid amido synthetase	Encodes an IAA-amido synthase that conjugates Ala, Asp, Phe, and Trp to auxin. Lines overexpressing this gene accumulate IAA-ASP and are hypersensitive to several auxins. Identified as a dominant mutation that displays shorter hypocotyls in light grown plants when compared to wild type siblings. Protein is similar to auxin inducible gene from pea (GH3).	DWARF IN LIGHT 1 (DFL1); FUNCTIONS IN: indole-3-acetic acid amido synthetase activity; INVOLVED IN: auxin homeostasis, auxin mediated signaling pathway, response to auxin stimulus, unidimensional cell growth; LOCATED IN: chloroplast, cytoplasm; EXPRESSED IN: 19 plant structures; EXPRESSED DURING: 12 growth stages; CONTAINS InterPro DOMAIN/s: GH3 auxin-responsive promoter (InterPro:IPR004993); BES…	GO:0005737 | GO:0009507	cytoplasm | chloroplast	Publication:501680345|PMID:11169197 | Publication:501712079|PMID:15028209	GO:0010279	indole-3-acetic acid amido synthetase activity	Publication:501714420|PMID:15659623	GO:0009733 | GO:0009733 | GO:0009734 | GO:0009826 | GO:0010252	response to auxin stimulus | response to auxin stimulus | auxin mediated signaling pathway | unidimensional cell growth | auxin homeostasis	Publication:501714420|PMID:15659623 | Communication:501714663 | Publication:501680345|PMID:11169197 | Publication:501680345|PMID:11169197 | Publication:501714420|PMID:15659623	GH3.6	2181	191	205	198	202	171	186.5	216	278	247	297	298	297.5	559	548	553.5	595	777	686	893	789	841	1124	991	1057.5	440	570	505
bHLH093	AT5G65640	AT5G65640	13	394	2	NA	NA	protein_coding	bHLH093 (beta HLH protein 93); DNA binding / transcription factor	---	beta HLH protein 93 (bHLH093); FUNCTIONS IN: transcription factor activity, DNA binding; INVOLVED IN: regulation of transcription; LOCATED IN: nucleus; EXPRESSED IN: 22 plant structures; EXPRESSED DURING: 13 growth stages; CONTAINS InterPro DOMAIN/s: Basic helix-loop-helix dimerisation region bHLH (InterPro:IPR001092), Helix-loop-helix DNA-binding (InterPro:IPR011598); BEST Arabidopsis thaliana p…	GO:0005634	nucleus	AnalysisReference:501730468	GO:0003677 | GO:0003700 | GO:0003700	DNA binding | transcription factor activity | transcription factor activity	Communication:501714663 | Publication:1345963|PMID:11118137 | Publication:501705886|PMID:12679534	GO:0045449	regulation of transcription	AnalysisReference:501730468	bHLH093	1318	31	48	39.5	32	17	24.5	82	70	76	31	36	33.5	38	35	36.5	52	71	61.5	37	32	34.5	60	42	51	57	61	59
LSH6	AT1G07090	AT1G07090	12	7	1	AT1G07090	1	protein_coding	LSH6 (LIGHT SENSITIVE HYPOCOTYLS 6)	---	LIGHT SENSITIVE HYPOCOTYLS 6 (LSH6); FUNCTIONS IN: molecular_function unknown; INVOLVED IN: biological_process unknown; LOCATED IN: cellular_component unknown; EXPRESSED IN: 20 plant structures; EXPRESSED DURING: 13 growth stages; CONTAINS InterPro DOMAIN/s: Protein of unknown function DUF640 (InterPro:IPR006936); BEST Arabidopsis thaliana protein match is: LSH5 (LIGHT SENSITIVE HYPOCOTYLS 5) (TA…	GO:0005575	cellular_component	Communication:501683652	GO:0003674	molecular_function	Communication:501683652	GO:0008150	biological_process	Communication:501683652	LSH6	943	32	36	34	32	32	32	68	68	68	32	37	34.5	35	27	31	35	36	35.5	42	58	50	37	40	38.5	105	137	121
PPCK1	AT1G08650	AT1G08650	12	737	1	NA	NA	protein_coding	PPCK1 (PHOSPHOENOLPYRUVATE CARBOXYLASE KINASE); kinase/ protein serine/threonine kinase	Encodes a phosphoenolpyruvate carboxylase kinase that is expressed at highest levels in leaves. Expression is induced by light.	PHOSPHOENOLPYRUVATE CARBOXYLASE KINASE (PPCK1); FUNCTIONS IN: protein serine/threonine kinase activity, kinase activity; INVOLVED IN: protein amino acid phosphorylation; LOCATED IN: cellular_component unknown; EXPRESSED IN: 20 plant structures; EXPRESSED DURING: 13 growth stages; CONTAINS InterPro DOMAIN/s: Protein kinase, ATP binding site (InterPro:IPR017441), Protein kinase, core (InterPro:IPR0…	GO:0005575	cellular_component	Communication:1345790	GO:0004674 | GO:0016301	protein serine/threonine kinase activity | kinase activity	Publication:977|PMID:10571893 | Communication:501714663	GO:0006468	protein amino acid phosphorylation	AnalysisReference:501730468	PPCK1	1429	341	455	398	150	120	135	86	88	87	127	132	129.5	164	155	159.5	164	221	192.5	474	323	398.5	176	118	147	404	364	384
FT	AT1G65480	AT1G65480	12	55	3	AT1G65480	3	protein_coding	FT (FLOWERING LOCUS T); phosphatidylethanolamine binding / protein binding	FT, together with LFY, promotes flowering and is antagonistic with its homologous gene, TERMINAL FLOWER1 (TFL1). FT is expressed in leaves and is induced by long day treatment. Either the FT mRNA or protein is translocated to the shoot apex where it induces its own expression. Recent data suggests that FT protein acts as a long-range signal. FT is a target of CO and acts upstream of SOC1.	FLOWERING LOCUS T (FT); FUNCTIONS IN: phosphatidylethanolamine binding, protein binding; INVOLVED IN: photoperiodism, flowering, positive regulation of flower development; LOCATED IN: nucleus, cytoplasm; EXPRESSED IN: 14 plant structures; EXPRESSED DURING: 7 growth stages; CONTAINS InterPro DOMAIN/s: Phosphatidylethanolamine-binding, conserved site (InterPro:IPR001858), Phosphatidylethanolamine-b…	GO:0005634 | GO:0005737	nucleus | cytoplasm	Publication:501718823|PMID:16099979 | Publication:501718823|PMID:16099979	GO:0005515 | GO:0008429	protein binding | phosphatidylethanolamine binding	Publication:501717507|PMID:16099980 | Publication:948|PMID:10583961	GO:0009911 | GO:0009911 | GO:0048573	positive regulation of flower development | positive regulation of flower development | "photoperiodism, flowering"	Publication:948|PMID:10583961 | Publication:949|PMID:10583960 | Publication:501721368|PMID:17446353	FT	855	2	0	1	6	4	5	0	0	0	4	4	4	1	2	1.5	13	12	12.5	5	16	10.5	19	19	19	1	1	1
SAW2	AT2G23760	AT2G23760	12	283	2	NA	NA	protein_coding	BLH4 (BEL1-LIKE HOMEODOMAIN 4); DNA binding / transcription factor	Encodes a member of the BEL family of homeodomain proteins. Plants doubly mutant for saw1/saw2 (blh2/blh4) have serrated leaves. BP is expressed in the serrated leaves, therefore saw2 and saw1 may act redundantly to repress BP in leaves.	BEL1-LIKE HOMEODOMAIN 4 (BLH4); FUNCTIONS IN: transcription factor activity, DNA binding; INVOLVED IN: leaf morphogenesis; LOCATED IN: nucleus; EXPRESSED IN: 24 plant structures; EXPRESSED DURING: 12 growth stages; CONTAINS InterPro DOMAIN/s: Homeobox, conserved site (InterPro:IPR017970), Homeobox (InterPro:IPR001356), Homeodomain-like (InterPro:IPR009057), POX (InterPro:IPR006563), Homeodomain-r…	GO:0005634	nucleus	AnalysisReference:501730468	GO:0003677 | GO:0003700	DNA binding | transcription factor activity	Communication:501714663 | Publication:1345963|PMID:11118137	GO:0006499 | GO:0009965	N-terminal protein myristoylation | leaf morphogenesis	Publication:501710157|PMID:12912986 | Publication:501723148|PMID:17873098	SAW2	2541	388	523	455.5	974	838	906	573	581	577	740	1008	874	944	1166	1055	953	1370	1161.5	1383	1805	1594	1243	961	1102	928	1056	992
EIL1	AT2G27050	AT2G27050	12	285	2	NA	NA	protein_coding	EIL1 (ETHYLENE-INSENSITIVE3-LIKE 1); transcription factor/ transcription regulator	ethylene-insensitive3-like1 (EIL1)	ETHYLENE-INSENSITIVE3-LIKE 1 (EIL1); FUNCTIONS IN: transcription factor activity, transcription regulator activity; INVOLVED IN: response to ethylene stimulus, ethylene mediated signaling pathway; LOCATED IN: nucleus; EXPRESSED IN: 24 plant structures; EXPRESSED DURING: 15 growth stages; CONTAINS InterPro DOMAIN/s: Ethylene insensitive 3 (InterPro:IPR006957); BEST Arabidopsis thaliana protein mat…	GO:0005634	nucleus	AnalysisReference:501730468	GO:0003700 | GO:0003700 | GO:0003700 | GO:0030528	transcription factor activity | transcription factor activity | transcription factor activity | transcription regulator activity	Publication:3192|PMID:9215635 | Publication:501683645|PMID:12606727 | Publication:1345963|PMID:11118137 | Publication:3192|PMID:9215635	GO:0009723 | GO:0009873 | GO:0009873	response to ethylene stimulus | ethylene mediated signaling pathway | ethylene mediated signaling pathway	Publication:501683645|PMID:12606727 | Publication:3192|PMID:9215635 | Publication:501683645|PMID:12606727	EIL1	2266	729	850	789.5	913	755	834	1319	1200	1259.5	841	1039	940	972	1171	1071.5	988	1290	1139	1332	1379	1355.5	1466	1229	1347.5	962	989	975.5
AT3G08570	AT3G08570	AT3G08570	12	114	2	AT3G08570	2	protein_coding	protein binding / signal transducer	---	protein binding / signal transducer; FUNCTIONS IN: protein binding, signal transducer activity; INVOLVED IN: response to light stimulus; LOCATED IN: chloroplast; EXPRESSED IN: 7 plant structures; EXPRESSED DURING: F mature embryo stage, petal differentiation and expansion stage, D bilateral stage, E expanded cotyledon stage; CONTAINS InterPro DOMAIN/s: NPH3 (InterPro:IPR004249), BTB/POZ (InterPro…	GO:0009507	chloroplast	AnalysisReference:501730133	GO:0004871 | GO:0004871 | GO:0005515	signal transducer activity | signal transducer activity | protein binding	Communication:501714663 | AnalysisReference:501730468 | AnalysisReference:501730468	GO:0009416 | GO:0009416	response to light stimulus | response to light stimulus	Communication:501714663 | AnalysisReference:501730468	AT3G08570	1854	66	106	86	84	80	82	85	99	92	77	96	86.5	55	80	67.5	35	62	48.5	212	171	191.5	189	153	171	179	193	186
HAT3	AT3G60390	AT3G60390	12	326	1	NA	NA	protein_coding	HAT3 (HOMEOBOX-LEUCINE ZIPPER PROTEIN 3); transcription factor	Encodes homeobox protein HAT3.	HOMEOBOX-LEUCINE ZIPPER PROTEIN 3 (HAT3); FUNCTIONS IN: transcription factor activity; INVOLVED IN: regulation of transcription, DNA-dependent, transcription, regulation of transcription; LOCATED IN: nucleus; EXPRESSED IN: 20 plant structures; EXPRESSED DURING: 12 growth stages; CONTAINS InterPro DOMAIN/s: HD-ZIP protein, N-terminal (InterPro:IPR006712), Homeobox, conserved site (InterPro:IPR0179…	GO:0005634 | GO:0005634	nucleus | nucleus	AnalysisReference:501730468 | Communication:501714663	GO:0003700	transcription factor activity	Publication:1345963|PMID:11118137	GO:0006350 | GO:0006355 | GO:0006355 | GO:0045449	transcription | "regulation of transcription, DNA-dependent" | "regulation of transcription, DNA-dependent" | regulation of transcription	AnalysisReference:501730468 | Communication:501714663 | AnalysisReference:501730468 | AnalysisReference:501730468	HAT3	1357	157	173	165	225	151	188	206	246	226	195	268	231.5	321	395	358	430	593	511.5	319	328	323.5	314	230	272	644	681	662.5
IAA29	AT4G32280	AT4G32280	12	167	6	AT4G32280	6	protein_coding	IAA29 (INDOLE-3-ACETIC ACID INDUCIBLE 29); transcription factor	Auxin inducible protein.	INDOLE-3-ACETIC ACID INDUCIBLE 29 (IAA29); FUNCTIONS IN: transcription factor activity; INVOLVED IN: response to cyclopentenone, response to auxin stimulus, response to red light, response to far red light; LOCATED IN: nucleus; EXPRESSED IN: 7 plant structures; EXPRESSED DURING: 6 growth stages; CONTAINS InterPro DOMAIN/s: Aux/IAA-ARF-dimerisation (InterPro:IPR011525), AUX/IAA protein (InterPro:I…	GO:0005634	nucleus	AnalysisReference:501730468	GO:0003700	transcription factor activity	Publication:1345963|PMID:11118137	GO:0009733 | GO:0010114 | GO:0010218 | GO:0010583	response to auxin stimulus | response to red light | response to far red light | response to cyclopentenone	Publication:501681609|PMID:12036262 | Publication:501720486|PMID:17076805 | Publication:501720486|PMID:17076805 | Publication:501724352|PMID:18334669	IAA29	989	10	10	10	33	22	27.5	16	10	13	29	30	29.5	52	119	85.5	126	191	158.5	760	1167	963.5	1658	1475	1566.5	100	137	118.5
TOPP6	AT5G43380	AT5G43380	12	2192	1	NA	NA	protein_coding	TOPP6; protein serine/threonine phosphatase	encodes a type I serine/threonine protein phosphatase expressed in expressed in roots, rosettes and flowers.	TOPP6; FUNCTIONS IN: protein serine/threonine phosphatase activity; INVOLVED IN: protein amino acid dephosphorylation; LOCATED IN: cellular_component unknown; EXPRESSED IN: 10 plant structures; EXPRESSED DURING: 4 anthesis, LP.04 four leaves visible, petal differentiation and expansion stage; CONTAINS InterPro DOMAIN/s: Metallophosphoesterase (InterPro:IPR004843), Serine/threonine-specific protei…	GO:0005575	cellular_component	Communication:1345790	GO:0004722 | GO:0004722	protein serine/threonine phosphatase activity | protein serine/threonine phosphatase activity	Publication:2553|PMID:9617814 | Publication:2553|PMID:9617814	GO:0006470	protein amino acid dephosphorylation	Publication:2553|PMID:9617814	TOPP6	1613	83	140	111.5	56	52	54	118	123	120.5	66	79	72.5	30	51	40.5	42	47	44.5	49	40	44.5	43	45	44	93	137	115
FRO7	AT5G49740	AT5G49740	12	931	1	NA	NA	protein_coding	ATFRO7 (FERRIC REDUCTION OXIDASE 7); ferric-chelate reductase/ oxidoreductase	Encodes a chloroplast ferric chelate reductase. Shows differential splicing and has three different mRNA products. Expressed in the shoot, flower and cotyledon.	FERRIC REDUCTION OXIDASE 7 (ATFRO7); FUNCTIONS IN: oxidoreductase activity, ferric-chelate reductase activity; INVOLVED IN: photosynthetic electron transport chain; LOCATED IN: chloroplast, membrane; EXPRESSED IN: shoot, cotyledon, fruit, flower; CONTAINS InterPro DOMAIN/s: Ferredoxin reductase-type FAD-binding domain (InterPro:IPR017927), Ferric reductase, NAD binding (InterPro:IPR013121), Cytoc…	GO:0009507 | GO:0016020	chloroplast | membrane	Publication:501727270|PMID:18647837 | Communication:501714663	GO:0000293 | GO:0000293 | GO:0016491	ferric-chelate reductase activity | ferric-chelate reductase activity | oxidoreductase activity	Publication:501727270|PMID:18647837 | Publication:501717438|PMID:16006655 | Communication:501714663	GO:0009767	photosynthetic electron transport chain	Publication:501727270|PMID:18647837	FRO7	2553	1632	1498	1565	2895	2473	2684	1564	1442	1503	2908	4100	3504	3942	4747	4344.5	2442	3100	2771	3218	4289	3753.5	3577	3565	3571	1581	1874	1727.5
GA20OX2	AT5G51810	AT5G51810	12	206	1	AT5G51810	1	protein_coding	GA20OX2 (GIBBERELLIN 20 OXIDASE 2); gibberellin 20-oxidase	Encodes gibberellin 20-oxidase. Involved in gibberellin biosynthesis. Up-regulated by far red light in elongating petioles. Not regulated by a circadian clock.	GIBBERELLIN 20 OXIDASE 2 (GA20OX2); FUNCTIONS IN: gibberellin 20-oxidase activity; INVOLVED IN: in 6 processes; EXPRESSED IN: 13 plant structures; EXPRESSED DURING: 7 growth stages; CONTAINS InterPro DOMAIN/s: Isopenicillin N synthase (InterPro:IPR002283), 2OG-Fe(II) oxygenase (InterPro:IPR005123); BEST Arabidopsis thaliana protein match is: GA20OX1; gibberellin 20-oxidase (TAIR:AT4G25420.1); Has…	---	---	---	GO:0045544	gibberellin 20-oxidase activity	Publication:4364|PMID:7630935	GO:0009639 | GO:0009686 | GO:0009739 | GO:0009739 | GO:0009739 | GO:0009826 | GO:0009908	response to red or far red light | gibberellin biosynthetic process | response to gibberellin stimulus | response to gibberellin stimulus | response to gibberellin stimulus | unidimensional cell growth | flower development	Publication:501716353|PMID:15923331 | Publication:4364|PMID:7630935 | Publication:501723369|PMID:17933900 | Publication:501717287|PMID:15927942 | Publication:501723369|PMID:17933900 | Publication:501723787|PMID:18069939 | Publication:501723787|PMID:18069939	GA20OX2	1400	11	8	9.5	61	37	49	3	13	8	36	35	35.5	53	55	54	87	98	92.5	114	119	116.5	67	65	66	13	25	19
PHYA	AT1G09570	AT1G09570	11	9	5	AT1G09570	5	protein_coding	PHYA (PHYTOCHROME A); G-protein coupled photoreceptor/ protein histidine kinase/ red or far-red light photoreceptor/ signal transducer	Light-labile cytoplasmic red/far-red light photoreceptor involved in the regulation of photomorphogenesis. It exists in two inter-convertible forms: Pr and Pfr (active) and functions as a dimer.The N terminus carries a single tetrapyrrole chromophore, and the C terminus is involved in dimerization. It is the sole photoreceptor mediating the FR high irradiance response (HIR). Major regulator in re…	PHYTOCHROME A (PHYA); FUNCTIONS IN: red or far-red light photoreceptor activity, protein histidine kinase activity, G-protein coupled photoreceptor activity, signal transducer activity; INVOLVED IN: in 8 processes; LOCATED IN: nuclear body, nucleus, cytoplasm; EXPRESSED IN: 22 plant structures; EXPRESSED DURING: 13 growth stages; CONTAINS InterPro DOMAIN/s: PAC motif (InterPro:IPR001610), Phytoch…	GO:0005634 | GO:0005737 | GO:0016604	nucleus | cytoplasm | nuclear body	Publication:501681668|PMID:12119377 | Publication:501681668|PMID:12119377 | Publication:501718285|PMID:16332538	GO:0004673 | GO:0004673 | GO:0004871 | GO:0008020 | GO:0009883 | GO:0009883	protein histidine kinase activity | protein histidine kinase activity | signal transducer activity | G-protein coupled photoreceptor activity | red or far-red light photoreceptor activity | red or far-red light photoreceptor activity	Communication:1675000 | Communication:1675000 | Communication:501714663 | Communication:501714663 | Publication:5105|PMID:8400877 | Publication:5105|PMID:8400877	GO:0006355 | GO:0009630 | GO:0009638 | GO:0010161 | GO:0010201 | GO:0010203 | GO:0010218 | GO:0046685	regulation of transcription, DNA-dependent | gravitropism | phototropism | red light signaling pathway | response to continuous far red light stimulus by the high-irradiance response system | response to very low fluence red light stimulus | response to far red light | response to arsenic	Communication:501714663 | Publication:501714588|PMID:15695459 | Publication:501711570|PMID:14686433 | Publication:501720486|PMID:17076805 | Publication:3002|PMID:9351250 | Publication:3002|PMID:9351250 | Publication:501714488|PMID:15665470 | Publication:501721161|PMID:17335514	PHYA	3829	1066	1471	1268.5	1173	935	1054	3427	3403	3415	1036	1367	1201.5	1425	1571	1498	1482	1907	1694.5	1508	1626	1567	2810	2856	2833	1473	1639	1556
IAA34	AT1G15050	AT1G15050	11	239	4	NA	NA	protein_coding	IAA34 (INDOLE-3-ACETIC ACID INDUCIBLE 34); transcription factor	Belongs to auxin inducible gene family.	INDOLE-3-ACETIC ACID INDUCIBLE 34 (IAA34); FUNCTIONS IN: transcription factor activity; INVOLVED IN: response to auxin stimulus; LOCATED IN: nucleus; CONTAINS InterPro DOMAIN/s: Aux/IAA-ARF-dimerisation (InterPro:IPR011525), AUX/IAA protein (InterPro:IPR003311); BEST Arabidopsis thaliana protein match is: IAA32 (INDOLE-3-ACETIC ACID INDUCIBLE 32); transcription factor (TAIR:AT2G01200.2); Has 857 …	GO:0005634	nucleus	AnalysisReference:501730468	GO:0003700	transcription factor activity	Publication:1345963|PMID:11118137	GO:0009733	response to auxin stimulus	Publication:501681609|PMID:12036262	IAA34	558	5	6	5.5	7	4	5.5	3	4	3.5	7	8	7.5	13	8	10.5	18	27	22.5	22	10	16	102	128	115	1	5	3
AT1G52770	AT1G52770	AT1G52770	11	37	1	AT1G52770	1	protein_coding	phototropic-responsive NPH3 family protein	---	phototropic-responsive NPH3 family protein; FUNCTIONS IN: signal transducer activity; INVOLVED IN: response to light stimulus; LOCATED IN: cellular_component unknown; EXPRESSED IN: 13 plant structures; EXPRESSED DURING: 12 growth stages; CONTAINS InterPro DOMAIN/s: NPH3 (InterPro:IPR004249); BEST Arabidopsis thaliana protein match is: phototropic-responsive NPH3 family protein (TAIR:AT3G15570.1);…	GO:0005575	cellular_component	Communication:1345790	GO:0004871 | GO:0004871	signal transducer activity | signal transducer activity	Communication:501714663 | AnalysisReference:501730468	GO:0009416 | GO:0009416	response to light stimulus | response to light stimulus	Communication:501714663 | AnalysisReference:501730468	AT1G52770	1723	26	32	29	46	45	45.5	7	7	7	14	21	17.5	30	22	26	23	28	25.5	19	31	25	24	16	20	17	20	18.5
AT1G75490	AT1G75490	AT1G75490	11	266	5	NA	NA	protein_coding	DNA binding / transcription factor	encodes a member of the DREB subfamily A-2 of ERF/AP2 transcription factor family. The protein contains one AP2 domain. There are eight members in this subfamily including DREB2A AND DREB2B that are involved in response to drought.	DNA binding / transcription factor; FUNCTIONS IN: transcription factor activity, DNA binding; INVOLVED IN: response to chitin, regulation of transcription, DNA-dependent; LOCATED IN: nucleus; CONTAINS InterPro DOMAIN/s: DNA-binding, integrase-type (InterPro:IPR016177), Pathogenesis-related transcriptional factor and ERF, DNA-binding (InterPro:IPR001471); BEST Arabidopsis thaliana protein match is…	GO:0005634	nucleus	Communication:501714663	GO:0003677 | GO:0003700 | GO:0003700	DNA binding | transcription factor activity | transcription factor activity	Communication:501714663 | Communication:501714663 | Publication:1345963|PMID:11118137	GO:0006355 | GO:0010200	regulation of transcription, DNA-dependent | response to chitin	Communication:501714663 | Publication:501722879|PMID:17722694	AT1G75490	1205	9	8	8.5	10	5	7.5	4	3	3.5	9	12	10.5	13	19	16	13	22	17.5	23	18	20.5	37	33	35	17	14	15.5
ARF11	AT2G46530	AT2G46530	11	302	3	NA	NA	protein_coding	ARF11 (AUXIN RESPONSE FACTOR 11); transcription factor	---	AUXIN RESPONSE FACTOR 11 (ARF11); FUNCTIONS IN: transcription factor activity; INVOLVED IN: response to hormone stimulus, regulation of transcription, DNA-dependent, regulation of transcription; LOCATED IN: endomembrane system, nucleus; EXPRESSED IN: 20 plant structures; EXPRESSED DURING: 13 growth stages; CONTAINS InterPro DOMAIN/s: Aux/IAA-ARF-dimerisation (InterPro:IPR011525), Transcriptional …	GO:0005634 | GO:0012505	nucleus | endomembrane system	AnalysisReference:501730468 | AnalysisReference:501730133	GO:0003700 | GO:0003700	transcription factor activity | transcription factor activity	Communication:501714663 | Publication:1345963|PMID:11118137	GO:0006355 | GO:0009725 | GO:0045449	regulation of transcription, DNA-dependent | response to hormone stimulus | regulation of transcription	AnalysisReference:501730468 | AnalysisReference:501730468 | AnalysisReference:501730468	ARF11	2533	410	564	487	486	408	447	973	969	971	387	424	405.5	480	605	542.5	385	534	459.5	433	361	397	655	525	590	650	785	717.5
MSG2	AT3G15540	AT3G15540	11	117	5	AT3G15540	5	protein_coding	IAA19 (INDOLE-3-ACETIC ACID INDUCIBLE 19); transcription factor	IAA induced protein 19	INDOLE-3-ACETIC ACID INDUCIBLE 19 (IAA19); FUNCTIONS IN: transcription factor activity; INVOLVED IN: phototropism, response to auxin stimulus, gravitropism, response to brassinosteroid stimulus; LOCATED IN: nucleus; EXPRESSED IN: 22 plant structures; EXPRESSED DURING: 13 growth stages; CONTAINS InterPro DOMAIN/s: Aux/IAA-ARF-dimerisation (InterPro:IPR011525), AUX/IAA protein (InterPro:IPR003311);…	GO:0005634	nucleus	AnalysisReference:501730468	GO:0003700	transcription factor activity	Publication:1345963|PMID:11118137	GO:0009630 | GO:0009638 | GO:0009733 | GO:0009733	gravitropism | phototropism | response to auxin stimulus | response to auxin stimulus	Publication:1546560 | Publication:1546560 | Publication:1546560 | Publication:501681609|PMID:12036262	MSG2	970	26	34	30	192	101	146.5	26	26	26	178	222	200	191	303	247	204	267	235.5	785	1102	943.5	1683	1662	1672.5	101	103	102
PAP12_2	AT3G16500	AT3G16500	11	308	2	NA	NA	protein_coding	PAP1 (PHYTOCHROME-ASSOCIATED PROTEIN 1); transcription factor	phytochrome-associated protein 1 (PAP1)	PHYTOCHROME-ASSOCIATED PROTEIN 1 (PAP1); FUNCTIONS IN: transcription factor activity; INVOLVED IN: response to auxin stimulus; LOCATED IN: nucleus; EXPRESSED IN: 22 plant structures; EXPRESSED DURING: 13 growth stages; CONTAINS InterPro DOMAIN/s: Aux/IAA-ARF-dimerisation (InterPro:IPR011525), AUX/IAA protein (InterPro:IPR003311); BEST Arabidopsis thaliana protein match is: IAA18 (INDOLE-3-ACETIC …	GO:0005634	nucleus	AnalysisReference:501730468	GO:0003700	transcription factor activity	Publication:1345963|PMID:11118137	GO:0009733	response to auxin stimulus	Publication:501681609|PMID:12036262	PAP12_2	1313	735	851	793	586	549	567.5	1103	1061	1082	542	574	558	624	736	680	497	625	561	558	595	576.5	819	704	761.5	730	816	773
PGP19	AT3G28860	AT3G28860	11	135	1	AT3G28860	1	protein_coding	ABCB19; ATPase, coupled to transmembrane movement of substances / auxin efflux transmembrane transporter	Belongs to the family of ATP-binding cassette (ABC) transporters. Also known as AtMDR11 and PGP19. Possibly regulates auxin-dependent responses by influencing basipetal auxin transport in the root. Acts upstream of phyA in regulating hypocotyl elongation and gravitropic response. Exerts nonredundant, partially overlapping functions with the ABC transporter encoded by AtPGP1.	ABCB19; FUNCTIONS IN: ATPase activity, coupled to transmembrane movement of substances, auxin efflux transmembrane transporter activity; INVOLVED IN: in 14 processes; LOCATED IN: plasma membrane; EXPRESSED IN: 28 plant structures; EXPRESSED DURING: 13 growth stages; CONTAINS InterPro DOMAIN/s: ATPase, AAA+ type, core (InterPro:IPR003593), ABC transporter-like (InterPro:IPR003439), ABC transporter…	GO:0005886 | GO:0005886	plasma membrane | plasma membrane	Publication:501718909|PMID:16618929 | Publication:501718960|PMID:16601150	GO:0010329 | GO:0042626	auxin efflux transmembrane transporter activity | "ATPase activity, coupled to transmembrane movement of substances"	Publication:501718960|PMID:16601150 | Communication:1674994	GO:0008361 | GO:0009637 | GO:0009639 | GO:0009640 | GO:0009733 | GO:0009926 | GO:0009958 | GO:0010218 | GO:0010540 | GO:0010541 | GO:0043481 | GO:0048364 | GO:0048443 | GO:0048527	regulation of cell size | response to blue light | response to red or far red light | photomorphogenesis | response to auxin stimulus | auxin polar transport | positive gravitropism | response to far red light | basipetal auxin transport | acropetal auxin transport | anthocyanin accumulation in tissues in response to UV light | root development | stamen development | lateral root development	Publication:501716336|PMID:15908594 | Publication:501716336|PMID:15908594 | Publication:501716336|PMID:15908594 | Publication:501716336|PMID:15908594 | Publication:501716336|PMID:15908594 | Publication:1546043|PMID:11701880 | Publication:501716336|PMID:15908594 | Publication:501716336|PMID:15908594 | Publication:1546043|PMID:11701880 | Publication:501722561|PMID:17557805 | Publication:501716336|P…	PGP19	4228	1846	2173	2009.5	1809	1464	1636.5	3860	3788	3824	1987	2290	2138.5	2357	2597	2477	2069	2676	2372.5	2620	2824	2722	2819	2795	2807	2896	3227	3061.5
PIL2	AT3G62090	AT3G62090	11	149	5	AT3G62090	5	protein_coding	PIL2 (PHYTOCHROME INTERACTING FACTOR 3-LIKE 2); protein binding / transcription factor	encodes a novel Myc-related bHLH transcription factor, which physically associated with APRR1/TOC1 and is a member of PIF3 transcription factor family.	PHYTOCHROME INTERACTING FACTOR 3-LIKE 2 (PIL2); FUNCTIONS IN: protein binding, transcription factor activity; INVOLVED IN: red or far red light signaling pathway; LOCATED IN: nucleus; EXPRESSED IN: stem, hypocotyl, root; CONTAINS InterPro DOMAIN/s: Basic helix-loop-helix dimerisation region bHLH (InterPro:IPR001092), Helix-loop-helix DNA-binding (InterPro:IPR011598); BEST Arabidopsis thaliana pro…	GO:0005634	nucleus	AnalysisReference:501730468	GO:0003700 | GO:0003700 | GO:0005515	transcription factor activity | transcription factor activity | protein binding	Publication:501705886|PMID:12679534 | Publication:501706884|PMID:12826627 | Publication:501706884|PMID:12826627	GO:0010017	red or far red light signaling pathway	Publication:501723260|PMID:17965713	PIL2	1805	21	17	19	39	30	34.5	63	61	62	29	54	41.5	31	50	40.5	28	49	38.5	60	78	69	127	148	137.5	45	38	41.5
DREB1B	AT4G25490	AT4G25490	11	342	1	NA	NA	protein_coding	CBF1 (C-REPEAT/DRE BINDING FACTOR 1); DNA binding / transcription activator/ transcription factor	Transcriptional activator that binds to the DRE/CRT regulatory element and induces COR (cold-regulated) gene expression increasing plant freezing tolerance. It encodes a member of the DREB subfamily A-1 of ERF/AP2 transcription factor family (CBF1). The protein contains one AP2 domain. There are six members in this subfamily, including CBF1, CBF2, and CBF3. This gene is involved in response to lo…	C-REPEAT/DRE BINDING FACTOR 1 (CBF1); FUNCTIONS IN: transcription factor activity, transcription activator activity, DNA binding; INVOLVED IN: cold acclimation, response to water deprivation, response to cold, response to abscisic acid stimulus, circadian rhythm; LOCATED IN: nucleus; EXPRESSED IN: 10 plant structures; EXPRESSED DURING: 4 anthesis, C globular stage, LP.02 two leaves visible, petal…	GO:0005634	nucleus	Publication:3426|PMID:9023378	GO:0003677 | GO:0003700 | GO:0016563 | GO:0016563 | GO:0016563	DNA binding | transcription factor activity | transcription activator activity | transcription activator activity | transcription activator activity	Publication:3426|PMID:9023378 | Publication:1345963|PMID:11118137 | Publication:3426|PMID:9023378 | Publication:2251|PMID:9707537 | Publication:3426|PMID:9023378	GO:0009409 | GO:0009409 | GO:0009409 | GO:0009409 | GO:0009414 | GO:0009631 | GO:0009631 | GO:0009631	response to cold | response to cold | response to cold | response to cold | response to water deprivation | cold acclimation | cold acclimation | cold acclimation	Publication:2201|PMID:9735350 | Publication:2251|PMID:9707537 | Publication:3426|PMID:9023378 | Publication:501717819|PMID:16258011 | Publication:3426|PMID:9023378 | Publication:2656|PMID:9525853 | Publication:501723725|PMID:18093929 | Publication:2201|PMID:9735350	DREB1B	946	0	2	1	0	4	2	60	134	97	2	1	1.5	8	0	4	16	17	16.5	7	4	5.5	3	0	1.5	9	2	5.5
AT5G28300	AT5G28300	AT5G28300	11	366	1	NA	NA	protein_coding	trihelix DNA-binding protein, putative	---	trihelix DNA-binding protein, putative; FUNCTIONS IN: transcription factor activity; INVOLVED IN: regulation of transcription; LOCATED IN: chloroplast; EXPRESSED IN: 22 plant structures; EXPRESSED DURING: 13 growth stages; CONTAINS InterPro DOMAIN/s: SANT, DNA-binding (InterPro:IPR001005), MYB-like (InterPro:IPR017877); BEST Arabidopsis thaliana protein match is: trihelix DNA-binding protein, put…	GO:0009507	chloroplast	AnalysisReference:501730133	GO:0003700	transcription factor activity	Publication:1345963|PMID:11118137	GO:0045449	regulation of transcription	Publication:1345963|PMID:11118137	AT5G28300	2180	361	413	387	352	286	319	776	694	735	447	520	483.5	473	564	518.5	474	660	567	674	713	693.5	464	405	434.5	865	957	911
AT1G01070	AT1G01070	AT1G01070	10	398	1	NA	NA	protein_coding	nodulin MtN21 family protein	---	nodulin MtN21 family protein; LOCATED IN: membrane; EXPRESSED IN: 17 plant structures; EXPRESSED DURING: 7 growth stages; CONTAINS InterPro DOMAIN/s: Protein of unknown function DUF6, transmembrane (InterPro:IPR000620); BEST Arabidopsis thaliana protein match is: nodulin MtN21 family protein (TAIR:AT1G11450.2); Has 1106 Blast hits to 1099 proteins in 165 species: Archae - 10; Bacteria - 379; Meta…	GO:0016020	membrane	AnalysisReference:501730468	---	---	---	---	---	---	AT1G01070	1450	43	20	31.5	58	51	54.5	51	48	49.5	43	42	42.5	44	33	38.5	28	24	26	37	30	33.5	25	21	23	44	48	46
PAP8	AT2G01890	AT2G01890	10	1019	1	NA	NA	protein_coding	PAP8 (PURPLE ACID PHOSPHATASE 8); acid phosphatase/ protein serine/threonine phosphatase	Encodes a purple acid phosphatase (PAP) belonging to the low molecular weight plant PAP group.	PURPLE ACID PHOSPHATASE 8 (PAP8); FUNCTIONS IN: protein serine/threonine phosphatase activity, acid phosphatase activity; INVOLVED IN: dephosphorylation; LOCATED IN: endomembrane system; EXPRESSED IN: 22 plant structures; EXPRESSED DURING: 12 growth stages; CONTAINS InterPro DOMAIN/s: Metallophosphoesterase (InterPro:IPR004843); BEST Arabidopsis thaliana protein match is: PAP3 (PURPLE ACID PHOSPH…	GO:0012505	endomembrane system	AnalysisReference:501730133	GO:0003993 | GO:0003993 | GO:0004722	acid phosphatase activity | acid phosphatase activity | protein serine/threonine phosphatase activity	Publication:501681413|PMID:12021284 | Publication:501717843|PMID:16244908 | Communication:501714663	GO:0016311	dephosphorylation	Publication:325|PMID:10854785	PAP8	1265	784	963	873.5	994	743	868.5	1521	1620	1570.5	780	1170	975	977	1284	1130.5	724	1034	879	762	742	752	621	509	565	996	1141	1068.5
GRF3	AT2G36400	AT2G36400	10	290	1	NA	NA	protein_coding	AtGRF3 (GROWTH-REGULATING FACTOR 3); transcription activator	Growth regulating factor encoding transcription activator. One of the nine members of a GRF gene family, containing nuclear targeting domain. Mutants result in smaller leaves indicating the role of the gene in leaf development. Expressed in root, shoot and flower.	GROWTH-REGULATING FACTOR 3 (AtGRF3); FUNCTIONS IN: transcription activator activity; INVOLVED IN: leaf development; LOCATED IN: nucleus; EXPRESSED IN: 22 plant structures; EXPRESSED DURING: 14 growth stages; CONTAINS InterPro DOMAIN/s: Glutamine-Leucine-Glutamine, QLQ (InterPro:IPR014978), WRC (InterPro:IPR014977); BEST Arabidopsis thaliana protein match is: AtGRF4 (GROWTH-REGULATING FACTOR 4); t…	GO:0005634	nucleus	Publication:501710542|PMID:12974814	GO:0016563	transcription activator activity	Publication:501710542|PMID:12974814	GO:0048366	leaf development	Publication:501710542|PMID:12974814	GRF3	1615	216	296	256	356	242	299	629	588	608.5	301	300	300.5	377	387	382	748	926	837	868	1017	942.5	507	395	451	655	696	675.5
BZIP34	AT2G42380	AT2G42380	10	296	1	NA	NA	protein_coding	bZIP transcription factor family protein	Encodes a member of the BZIP family of transcription factors. Forms heterodimers with the related protein AtbZIP61. Binds to G-boxes in vitro and is localized to the nucleus in onion epidermal cells.	BZIP34; FUNCTIONS IN: transcription factor activity, transcription activator activity, DNA binding; INVOLVED IN: regulation of transcription, DNA-dependent; LOCATED IN: nucleus; EXPRESSED IN: male gametophyte, flower, carpel; EXPRESSED DURING: L mature pollen stage, M germinated pollen stage, 4 anthesis, petal differentiation and expansion stage; CONTAINS InterPro DOMAIN/s: Basic-leucine zipper (…	GO:0005634	nucleus	Publication:501722898|PMID:17719007	GO:0003677 | GO:0003677 | GO:0003700 | GO:0003700 | GO:0016563	DNA binding | DNA binding | transcription factor activity | transcription factor activity | transcription activator activity	Publication:501722898|PMID:17719007 | Communication:501714663 | Publication:1345963|PMID:11118137 | Publication:1547369|PMID:11906833 | Publication:501722898|PMID:17719007	GO:0006355	regulation of transcription, DNA-dependent	AnalysisReference:501730468	BZIP34	1556	305	389	347	920	739	829.5	667	819	743	927	1359	1143	974	1310	1142	1009	1411	1210	1077	1119	1098	1326	1058	1192	896	1129	1012.5
PAR1	AT2G42870	AT2G42870	10	109	6	AT2G42870	6	protein_coding	PAR1 (PHY RAPIDLY REGULATED 1)	Encodes PHYTOCHROME RAPIDLY REGULATED1 (PAR1), an atypical basic helix-loop-helix (bHLP) protein. Closely related to PAR2 (At3g58850). Up regulated after simulated shade perception. Acts in the nucleus to control plant development and as a negative regulator of shade avoidance response. Functions as transcriptional repressor of auxin-responsive genes SAUR15 (AT4G38850) and SAUR68 (AT1G29510).	PHY RAPIDLY REGULATED 1 (PAR1); INVOLVED IN: developmental process, shade avoidance; LOCATED IN: nucleus; EXPRESSED IN: 11 plant structures; EXPRESSED DURING: 8 growth stages; BEST Arabidopsis thaliana protein match is: PAR2 (PHY RAPIDLY REGULATED 2) (TAIR:AT3G58850.1); Has 47 Blast hits to 47 proteins in 6 species: Archae - 0; Bacteria - 0; Metazoa - 0; Fungi - 0; Plants - 47; Viruses - 0; Other…	GO:0005634	nucleus	Publication:501723325|PMID:17948056	---	---	---	GO:0009641 | GO:0009641 | GO:0009641 | GO:0032502	shade avoidance | shade avoidance | shade avoidance | developmental process	Publication:501723325|PMID:17948056 | Publication:501718653|PMID:16565297 | Publication:501723325|PMID:17948056 | Publication:501723325|PMID:17948056	PAR1	835	35	59	47	43	30	36.5	76	73	74.5	38	59	48.5	74	85	79.5	97	176	136.5	262	323	292.5	183	150	166.5	251	304	277.5
WRKY22	AT4G01250	AT4G01250	10	331	2	NA	NA	protein_coding	WRKY22; transcription factor	member of WRKY Transcription Factor; Group II-e	WRKY22; FUNCTIONS IN: transcription factor activity; INVOLVED IN: response to chitin, regulation of transcription, DNA-dependent; LOCATED IN: nucleus; EXPRESSED IN: 21 plant structures; EXPRESSED DURING: 13 growth stages; CONTAINS InterPro DOMAIN/s: DNA-binding WRKY (InterPro:IPR003657); BEST Arabidopsis thaliana protein match is: WRKY27; transcription factor (TAIR:AT5G52830.1); Has 1940 Blast hi…	GO:0005634	nucleus	AnalysisReference:501730468	GO:0003700 | GO:0003700 | GO:0003700 | GO:0003700	transcription factor activity | transcription factor activity | transcription factor activity | transcription factor activity	Publication:492|PMID:10785665 | Communication:1674991 | Publication:1345963|PMID:11118137 | Publication:492|PMID:10785665	GO:0006355 | GO:0010200	regulation of transcription, DNA-dependent | response to chitin	Publication:492|PMID:10785665 | Publication:501722879|PMID:17722694	WRKY22	1219	23	28	25.5	108	80	94	97	131	114	109	164	136.5	94	122	108	118	155	136.5	108	134	121	283	217	250	106	126	116
AT4G16750	AT4G16750	AT4G16750	10	336	3	NA	NA	protein_coding	DRE-binding transcription factor, putative	encodes a member of the DREB subfamily A-4 of ERF/AP2 transcription factor family. The protein contains one AP2 domain. There are 17 members in this subfamily including TINY.	DRE-binding transcription factor, putative; FUNCTIONS IN: transcription factor activity, DNA binding; INVOLVED IN: multicellular organismal development; LOCATED IN: nucleus; EXPRESSED IN: 10 plant structures; EXPRESSED DURING: 4 anthesis, LP.04 four leaves visible, 4 leaf senescence stage, petal differentiation and expansion stage; CONTAINS InterPro DOMAIN/s: DNA-binding, integrase-type (InterPro…	GO:0005634	nucleus	Publication:4759|PMID:7919989	GO:0003677 | GO:0003700 | GO:0003700	DNA binding | transcription factor activity | transcription factor activity	Communication:501714663 | Publication:4759|PMID:7919989 | Publication:1345963|PMID:11118137	GO:0007275	multicellular organismal development	Publication:3195|PMID:9192694	AT4G16750	843	37	40	38.5	25	21	23	43	80	61.5	29	11	20	28	41	34.5	36	53	44.5	36	41	38.5	41	34	37.5	78	94	86
DWF2	AT4G39400	AT4G39400	10	174	3	AT4G39400	3	protein_coding	BRI1 (BRASSINOSTEROID INSENSITIVE 1); kinase/ protein binding / protein heterodimerization/ protein homodimerization/ protein kinase/ protein serine/threonine kinase	Encodes a plasma membrane localized leucine-rich repeat receptor kinase involved in brassinosteroid signal transduction. BRI1 ligand is brassinolide which binds at the extracellular domain. Binding results in phosphorylation of the kinase domain which activates the BRI1 protein leading to BR responses. Residue T-1049 and either S-1044 or T-1045 were essential for kinase function in vitro and norm…	BRASSINOSTEROID INSENSITIVE 1 (BRI1); FUNCTIONS IN: in 6 functions; INVOLVED IN: in 6 processes; LOCATED IN: endosome, plasma membrane, protein complex; EXPRESSED IN: 24 plant structures; EXPRESSED DURING: 13 growth stages; CONTAINS InterPro DOMAIN/s: Protein kinase, ATP binding site (InterPro:IPR017441), Protein kinase, core (InterPro:IPR000719), Leucine-rich repeat, N-terminal (InterPro:IPR0132…	GO:0005768 | GO:0005886 | GO:0005886 | GO:0005886 | GO:0043234	endosome | plasma membrane | plasma membrane | plasma membrane | protein complex	Publication:501714894|PMID:15548744 | Publication:147|PMID:10938344 | Publication:501718909|PMID:16618929 | Publication:501729143|PMID:19004783 | Publication:501718545|PMID:16473966	GO:0004672 | GO:0004674 | GO:0005515 | GO:0005515 | GO:0005515 | GO:0016301 | GO:0042803 | GO:0046982 | GO:0046982	protein kinase activity | protein serine/threonine kinase activity | protein binding | protein binding | protein binding | kinase activity | protein homodimerization activity | protein heterodimerization activity | protein heterodimerization activity	Publication:501721274|PMID:16857903 | Publication:501716342|PMID:15935775 | Publication:501716492|PMID:15998311 | Publication:501681867|PMID:0012150929 | Publication:501716342|PMID:15935775 | Communication:1674994 | Publication:501714679|PMID:15650741 | Publication:501714894|PMID:15548744 | Publication:501721274|PMID:16857903	GO:0009729 | GO:0009742 | GO:0009742 | GO:0009826 | GO:0009911 | GO:0010224 | GO:0010268	detection of brassinosteroid stimulus | brassinosteroid mediated signaling | brassinosteroid mediated signaling | unidimensional cell growth | positive regulation of flower development | response to UV-B | brassinosteroid homeostasis	Publication:3078|PMID:9298904 | Publication:501729619|PMID:19124768 | Publication:3078|PMID:9298904 | Publication:501675225 | Publication:501722791|PMID:17611230 | Publication:501714274|PMID:15474373 | Publication:501716542|PMID:15908602	DWF2	4166	1884	2365	2124.5	3755	3102	3428.5	4181	4396	4288.5	3573	4698	4135.5	4432	5133	4782.5	4043	5567	4805	5901	6521	6211	6706	6369	6537.5	4419	4931	4675
BIM1	AT5G08130	AT5G08130	10	357	3	NA	NA	protein_coding	BIM1; DNA binding / protein binding / transcription factor	Arabidopsis thaliana basic helix-loop-helix (bHLH) family protein involved in brassinosteroid signaling. It synergistically interacts with BES1 to bind to E box sequences (CANNTG).	BIM1; FUNCTIONS IN: protein binding, transcription factor activity, DNA binding; INVOLVED IN: brassinosteroid mediated signaling, regulation of transcription; LOCATED IN: nucleus; EXPRESSED IN: 22 plant structures; EXPRESSED DURING: 13 growth stages; CONTAINS InterPro DOMAIN/s: Basic helix-loop-helix dimerisation region bHLH (InterPro:IPR001092), Helix-loop-helix DNA-binding (InterPro:IPR011598);…	GO:0005634	nucleus	AnalysisReference:501730468	GO:0003677 | GO:0003700 | GO:0003700 | GO:0003700 | GO:0005515	DNA binding | transcription factor activity | transcription factor activity | transcription factor activity | protein binding	Communication:501714663 | Publication:1345963|PMID:11118137 | Publication:501705886|PMID:12679534 | Publication:501714486|PMID:15680330 | Publication:501714486|PMID:15680330	GO:0009742 | GO:0045449	brassinosteroid mediated signaling | regulation of transcription	Publication:501714486|PMID:15680330 | Publication:1345963|PMID:11118137	BIM1	2736	1124	1589	1356.5	1236	999	1117.5	1790	1969	1879.5	1087	1238	1162.5	1086	1268	1177	923	1211	1067	5189	6142	5665.5	2367	2120	2243.5	5305	5854	5579.5
PHYB	AT2G18790	AT2G18790	9	83	6	AT2G18790	6	protein_coding	PHYB (PHYTOCHROME B); G-protein coupled photoreceptor/ protein histidine kinase/ red or far-red light photoreceptor/ signal transducer	Red/far-red photoreceptor involved in the regulation of de-etiolation. Exists in two inter-convertible forms: Pr and Pfr (active). Involved in the light-promotion of seed germination and in the shade avoidance response.	PHYTOCHROME B (PHYB); FUNCTIONS IN: red or far-red light photoreceptor activity, protein histidine kinase activity, G-protein coupled photoreceptor activity, signal transducer activity; INVOLVED IN: in 15 processes; LOCATED IN: nucleus; EXPRESSED IN: 22 plant structures; EXPRESSED DURING: 15 growth stages; CONTAINS InterPro DOMAIN/s: Phytochrome, central region (InterPro:IPR013515), Signal transd…	GO:0005634 | GO:0005634	nucleus | nucleus	Publication:1571|PMID:10225946 | Publication:501715288|PMID:15823535	GO:0004673 | GO:0004871 | GO:0008020 | GO:0009883	protein histidine kinase activity | signal transducer activity | G-protein coupled photoreceptor activity | red or far-red light photoreceptor activity	Communication:1675000 | Communication:501714663 | Communication:501714663 | Publication:501681785|PMID:0012177480	GO:0006355 | GO:0009409 | GO:0009630 | GO:0009638 | GO:0009649 | GO:0009687 | GO:0009867 | GO:0010029 | GO:0010148 | GO:0010161 | GO:0010202 | GO:0010374 | GO:0010617 | GO:0015979 | GO:0031347	regulation of transcription, DNA-dependent | response to cold | gravitropism | phototropism | entrainment of circadian clock | abscisic acid metabolic process | jasmonic acid mediated signaling pathway | regulation of seed germination | transpiration | red light signaling pathway | response to low fluence red light stimulus | stomatal complex development | circadian regulation of calcium ion osci…	Communication:501714663 | Publication:501681880|PMID:12148528 | Publication:501714588|PMID:15695459 | Publication:501711570|PMID:14686433 | Publication:501681785|PMID:0012177480 | Publication:501720219|PMID:17010113 | Publication:501730123|PMID:19251652 | Publication:501720219|PMID:17010113 | Publication:501730235|PMID:19363093 | Publication:501720486|PMID:17076805 | Publication:3002|PMID:9351250…	PHYB	3996	3185	3871	3528	2807	2385	2596	4015	4114	4064.5	2370	3051	2710.5	2694	3359	3026.5	2097	2701	2399	9414	10253	9833.5	6291	5523	5907	9700	10625	10162.5
GATA2	AT2G45050	AT2G45050	9	110	3	AT2G45050	3	protein_coding	zinc finger (GATA type) family protein	---	zinc finger (GATA type) family protein; FUNCTIONS IN: transcription factor activity; INVOLVED IN: regulation of transcription, DNA-dependent; LOCATED IN: nucleus; EXPRESSED IN: leaf lamina base, petal, root, carpel; EXPRESSED DURING: 4 anthesis, petal differentiation and expansion stage; CONTAINS InterPro DOMAIN/s: Zinc finger, NHR/GATA-type (InterPro:IPR013088), Transcription factor, GATA, plant…	GO:0005634	nucleus	AnalysisReference:501730468	GO:0003700 | GO:0003700	transcription factor activity | transcription factor activity	Communication:501714663 | Publication:1345963|PMID:11118137	GO:0006355	regulation of transcription, DNA-dependent	AnalysisReference:501730468	GATA2	1119	68	100	84	58	44	51	85	95	90	57	50	53.5	59	70	64.5	63	93	78	67	90	78.5	93	54	73.5	177	179	178
AT3G08640	AT3G08640	AT3G08640	9	115	2	AT3G08640	2	protein_coding	alphavirus core protein family	---	alphavirus core protein family; FUNCTIONS IN: molecular_function unknown; INVOLVED IN: biological_process unknown; LOCATED IN: mitochondrion, chloroplast, plastid, chloroplast envelope; EXPRESSED IN: 23 plant structures; EXPRESSED DURING: 13 growth stages; BEST Arabidopsis thaliana protein match is: unknown protein (TAIR:AT3G08630.1); Has 10912 Blast hits to 4701 proteins in 450 species: Archae -…	GO:0005739 | GO:0009507 | GO:0009536 | GO:0009941	mitochondrion | chloroplast | plastid | chloroplast envelope	Publication:501718909|PMID:16618929 | Publication:501724486|PMID:18431481 | Publication:501718909|PMID:16618929 | Publication:501707066|PMID:12766230	GO:0003674	molecular_function	Communication:501683652	GO:0008150	biological_process	Communication:1345790	AT3G08640	1429	905	1102	1003.5	1123	908	1015.5	1227	1205	1216	768	875	821.5	972	971	971.5	742	970	856	1952	2603	2277.5	1409	1319	1364	1962	2202	2082
MYB10	AT3G12820	AT3G12820	9	307	4	NA	NA	protein_coding	AtMYB10 (myb domain protein 10); DNA binding / transcription factor	Member of the R2R3 factor gene family.	myb domain protein 10 (AtMYB10); FUNCTIONS IN: transcription factor activity, DNA binding; INVOLVED IN: N-terminal protein myristoylation, regulation of transcription, DNA-dependent; EXPRESSED IN: shoot apex, sepal, hypocotyl, flower, root; EXPRESSED DURING: petal differentiation and expansion stage; CONTAINS InterPro DOMAIN/s: SANT, DNA-binding (InterPro:IPR001005), Homeodomain-like (InterPro:IP…	---	---	---	GO:0003677 | GO:0003700	DNA binding | transcription factor activity	Communication:501714663 | Publication:1345963|PMID:11118137	GO:0006355 | GO:0006499	regulation of transcription, DNA-dependent | N-terminal protein myristoylation	Publication:1979|PMID:9839469 | Publication:501710157|PMID:12912986	MYB10	890	5	6	5.5	0	6	3	12	6	9	0	4	2	5	6	5.5	6	6	6	7	2	4.5	33	27	30	4	6	5
AT4G10240	AT4G10240	AT4G10240	9	1896	3	NA	NA	protein_coding	zinc finger (B-box type) family protein	---	zinc finger (B-box type) family protein; FUNCTIONS IN: transcription factor activity, zinc ion binding; INVOLVED IN: regulation of transcription; LOCATED IN: intracellular; EXPRESSED IN: leaf whorl, petal, carpel; EXPRESSED DURING: petal differentiation and expansion stage; CONTAINS InterPro DOMAIN/s: Zinc finger, B-box (InterPro:IPR000315); BEST Arabidopsis thaliana protein match is: LZF1 (LIGHT…	GO:0005622	intracellular	AnalysisReference:501730468	GO:0003700 | GO:0008270	transcription factor activity | zinc ion binding	Publication:1345963|PMID:11118137 | Communication:501714663	GO:0045449	regulation of transcription	Publication:1345963|PMID:11118137	AT4G10240	520	0	2	1	2	0	1	0	2	1	2	1	1.5	1	0	0.5	1	1	1	1	0	0.5	11	8	9.5	0	0	0
HAT12	AT4G17460	AT4G17460	9	338	1	NA	NA	protein_coding	HAT1; DNA binding / transcription factor	Encodes homeobox protein HAT1.	HAT1; FUNCTIONS IN: transcription factor activity, DNA binding; INVOLVED IN: regulation of transcription, DNA-dependent, transcription, regulation of transcription; LOCATED IN: nucleus; EXPRESSED IN: 22 plant structures; EXPRESSED DURING: 13 growth stages; CONTAINS InterPro DOMAIN/s: HD-ZIP protein, N-terminal (InterPro:IPR006712), Helix-turn-helix motif, lambda-like repressor (InterPro:IPR000047…	GO:0005634 | GO:0005634	nucleus | nucleus	AnalysisReference:501730468 | Communication:501714663	GO:0003677 | GO:0003700	DNA binding | transcription factor activity	Communication:501714663 | Publication:1345963|PMID:11118137	GO:0006350 | GO:0006355 | GO:0006355 | GO:0045449	transcription | "regulation of transcription, DNA-dependent" | "regulation of transcription, DNA-dependent" | regulation of transcription	AnalysisReference:501730468 | Communication:501714663 | AnalysisReference:501730468 | AnalysisReference:501730468	HAT12	1211	477	481	479	904	775	839.5	856	940	898	836	1261	1048.5	1025	1283	1154	880	1308	1094	941	1103	1022	969	871	920	2076	2602	2339
ORE1	AT5G39610	AT5G39610	9	370	1	NA	NA	protein_coding	ATNAC6 (ARABIDOPSIS NAC DOMAIN CONTAINING PROTEIN 6); protein heterodimerization/ protein homodimerization/ transcription factor	Encodes a NAC-domain transcription factor. Positively regulates aging-induced cell death and senescence in leaves. This gene is upregulated in response to salt stress in wildtype as well as NTHK1 transgenic lines although in the latter case the induction was drastically reduced. It was also upregulated by ABA, ACC and NAA treatment, although in the latter two cases, the induction occurred relativ…	ARABIDOPSIS NAC DOMAIN CONTAINING PROTEIN 6 (ATNAC6); FUNCTIONS IN: transcription factor activity, protein heterodimerization activity, protein homodimerization activity; INVOLVED IN: in 7 processes; LOCATED IN: nucleus; EXPRESSED IN: 13 plant structures; EXPRESSED DURING: 6 growth stages; CONTAINS InterPro DOMAIN/s: No apical meristem (NAM) protein (InterPro:IPR003441); BEST Arabidopsis thaliana…	GO:0005634	nucleus	Publication:501718231|PMID:16359384	GO:0003700 | GO:0003700 | GO:0042803	transcription factor activity | transcription factor activity | protein homodimerization activity	Publication:1345963|PMID:11118137 | Publication:501718231|PMID:16359384 | Publication:501718231|PMID:16359384	GO:0006979 | GO:0007275 | GO:0010149 | GO:0010150	response to oxidative stress | multicellular organismal development | senescence | leaf senescence	Publication:501713092|PMID:15295076 | Communication:501714663 | Publication:3011|PMID:9351240 | Publication:501729812|PMID:19229035	ORE1	1187	6	12	9	38	12	25	6	6	6	6	11	8.5	11	4	7.5	12	14	13	9	6	7.5	3	3	3	10	12	11
OBP4	AT5G60850	AT5G60850	9	387	2	NA	NA	protein_coding	OBP4; DNA binding / transcription factor	Encodes a zinc finger protein.	OBP4; FUNCTIONS IN: transcription factor activity, DNA binding; INVOLVED IN: regulation of transcription; LOCATED IN: cellular_component unknown; EXPRESSED IN: 23 plant structures; EXPRESSED DURING: 13 growth stages; CONTAINS InterPro DOMAIN/s: Zinc finger, Dof-type (InterPro:IPR003851); BEST Arabidopsis thaliana protein match is: Dof-type zinc finger domain-containing protein (TAIR:AT5G65590.1);…	GO:0005575	cellular_component	Communication:1345790	GO:0003677 | GO:0003700 | GO:0003700	DNA binding | transcription factor activity | transcription factor activity	Communication:501714663 | Publication:1345963|PMID:11118137 | Publication:501682896|PMID:12475498	GO:0045449	regulation of transcription	Publication:1345963|PMID:11118137	OBP4	1425	332	342	337	618	518	568	629	673	651	567	710	638.5	620	983	801.5	701	922	811.5	963	1105	1034	798	654	726	1170	1451	1310.5
IAA5	AT1G15580	AT1G15580	8	240	3	NA	NA	protein_coding	IAA5 (INDOLE-3-ACETIC ACID INDUCIBLE 5); transcription factor	auxin induced protein	INDOLE-3-ACETIC ACID INDUCIBLE 5 (IAA5); FUNCTIONS IN: transcription factor activity; INVOLVED IN: response to cyclopentenone, response to auxin stimulus, response to brassinosteroid stimulus; LOCATED IN: nucleus; EXPRESSED IN: flower; EXPRESSED DURING: petal differentiation and expansion stage; CONTAINS InterPro DOMAIN/s: Aux/IAA-ARF-dimerisation (InterPro:IPR011525), AUX/IAA protein (InterPro:I…	GO:0005634	nucleus	AnalysisReference:501730468	GO:0003700	transcription factor activity	Publication:1345963|PMID:11118137	GO:0009733 | GO:0009733 | GO:0010583	response to auxin stimulus | response to auxin stimulus | response to cyclopentenone	Publication:501681609|PMID:12036262 | Publication:5602|PMID:2102379 | Publication:501724352|PMID:18334669	IAA5	628	1	1	1	7	5	6	3	2	2.5	5	4	4.5	9	14	11.5	9	14	11.5	90	129	109.5	93	74	83.5	8	8	8
WEI8	AT1G70560	AT1G70560	8	58	3	AT1G70560	3	protein_coding	TAA1 (TRYPTOPHAN AMINOTRANSFERASE OF ARABIDOPSIS 1); L-alanine:2-oxoglutarate aminotransferase/ L-glutamine:2-oxoglutarate aminotransferase/ L-leucine:2-oxoglutarate aminotransferase/ L-methionine:2-oxoglutarate aminotransferase/ L-phenylalanine:2-oxoglut	TAA1 is involved in the shade-induced production of indole-3-pyruvate (IPA), a precursor to IAA, a biologically active auxin. It is also involved in regulating many aspects of plant growth and development from embryogenesis to flower formation and plays a role in ethylene-mediated signaling. This enzyme can catalyze the formation of IPA from L-tryptophan. Though L-Trp is expected to be the prefer…	TRYPTOPHAN AMINOTRANSFERASE OF ARABIDOPSIS 1 (TAA1); FUNCTIONS IN: in 12 functions; INVOLVED IN: in 15 processes; LOCATED IN: cytoplasm; EXPRESSED IN: 34 plant structures; EXPRESSED DURING: 10 growth stages; CONTAINS InterPro DOMAIN/s: Pyridoxal phosphate-dependent transferase, major region (InterPro:IPR015424), Pyridoxal phosphate-dependent transferase, major region, subdomain 1 (InterPro:IPR015…	GO:0005737	cytoplasm	Publication:501729939|PMID:18394996	GO:0004021 | GO:0004838 | GO:0016846 | GO:0030170 | GO:0047312 | GO:0050048 | GO:0050362	L-alanine:2-oxoglutarate aminotransferase activity | L-tyrosine:2-oxoglutarate aminotransferase activity | carbon-sulfur lyase activity | pyridoxal phosphate binding | L-phenylalanine:pyruvate aminotransferase activity | L-leucine:2-oxoglutarate aminotransferase activity | L-tryptophan:2-oxoglutarate aminotransferase activity	Publication:501729939|PMID:18394996 | Publication:501729939|PMID:18394996 | Communication:501714663 | Publication:501729939|PMID:18394996 | Publication:501729939|PMID:18394996 | Publication:501729939|PMID:18394996 | Publication:501729939|PMID:18394996	GO:0009641 | GO:0009684 | GO:0009723 | GO:0009793 | GO:0009908 | GO:0009958 | GO:0010078 | GO:0010087 | GO:0010588 | GO:0022621 | GO:0048364 | GO:0048366 | GO:0048467 | GO:0048825	shade avoidance | indoleacetic acid biosynthetic process | response to ethylene stimulus | embryonic development ending in seed dormancy | flower development | positive gravitropism | maintenance of root meristem identity | phloem or xylem histogenesis | cotyledon vascular tissue pattern formation | shoot system development | root development | leaf development | gynoecium development | cotyledon…	Publication:501729939|PMID:18394996 | Publication:501729939|PMID:18394996 | Publication:501729935|PMID:18394997 | Publication:501729935|PMID:18394997 | Publication:501729935|PMID:18394997 | Publication:501729935|PMID:18394997 | Publication:501729935|PMID:18394997 | Publication:501729935|PMID:18394997 | Publication:501729935|PMID:18394997 | Publication:501729935|PMID:18394997 | Publication:5017299…	WEI8	1399	117	155	136	164	129	146.5	501	414	457.5	267	251	259	296	290	293	439	501	470	67	77	72	97	68	82.5	197	238	217.5
AT2G36080	AT2G36080	AT2G36080	8	289	1	NA	NA	protein_coding	DNA-binding protein, putative	Encodes a plant-specific B3 DNA-binding domain transcription factor. Has transcription repressor activity.	DNA-binding protein, putative; FUNCTIONS IN: transcription repressor activity, transcription factor activity; INVOLVED IN: regulation of transcription, DNA-dependent; LOCATED IN: cellular_component unknown; EXPRESSED IN: 9 plant structures; EXPRESSED DURING: 4 anthesis, LP.04 four leaves visible, C globular stage, petal differentiation and expansion stage; CONTAINS InterPro DOMAIN/s: Transcriptio…	GO:0005575	cellular_component	Communication:1345790	GO:0003700 | GO:0016564	transcription factor activity | transcription repressor activity	Publication:1345963|PMID:11118137 | Publication:501729963|PMID:19324928	GO:0006355	regulation of transcription, DNA-dependent	AnalysisReference:501730468	AT2G36080	1608	85	113	99	66	69	67.5	147	139	143	39	51	45	65	70	67.5	106	131	118.5	181	169	175	81	54	67.5	145	135	140
IAA7	AT3G23050	AT3G23050	8	310	4	NA	NA	protein_coding	IAA7 (INDOLE-3-ACETIC ACID 7); transcription factor	Transcription regulator acting as repressor of auxin-inducible gene expression. Plays role in the control of gravitropic growth and development in light-grown seedlings. Auxin induces the degradation of the protein in a dosage-dependent manner in a process mediated by AtRac1. Auxin induced the relocalization of the protein within the nucleus from a diffused nucleoplasmic pattern to a discrete par…	INDOLE-3-ACETIC ACID 7 (IAA7); FUNCTIONS IN: transcription factor activity; INVOLVED IN: in 6 processes; LOCATED IN: proteasome complex, signalosome, SCF ubiquitin ligase complex, nucleus; EXPRESSED IN: 22 plant structures; EXPRESSED DURING: 13 growth stages; CONTAINS InterPro DOMAIN/s: Aux/IAA-ARF-dimerisation (InterPro:IPR011525), AUX/IAA protein (InterPro:IPR003311); BEST Arabidopsis thaliana …	GO:0000502 | GO:0005634 | GO:0008180 | GO:0019005	proteasome complex | nucleus | signalosome | SCF ubiquitin ligase complex	Publication:501716539|PMID:15994909 | Publication:501716539|PMID:15994909 | Publication:501716539|PMID:15994909 | Publication:501716539|PMID:15994909	GO:0003700	transcription factor activity	Publication:1345963|PMID:11118137	GO:0009414 | GO:0009611 | GO:0009630 | GO:0009733 | GO:0009753 | GO:0040008	response to water deprivation | response to wounding | gravitropism | response to auxin stimulus | response to jasmonic acid stimulus | regulation of growth	Publication:3673|PMID:8979397 | Publication:501717417|PMID:16021335 | Publication:5626|PMID:2148800 | Publication:501681609|PMID:12036262 | Publication:501717417|PMID:16021335 | Publication:314|PMID:10859186	IAA7	1562	2567	2888	2727.5	3114	2555	2834.5	3254	3317	3285.5	3242	3878	3560	3484	4041	3762.5	2655	3434	3044.5	3738	4120	3929	5847	5387	5617	3335	4003	3669
ORG3	AT3G56980	AT3G56980	8	323	1	NA	NA	protein_coding	BHLH039; DNA binding / transcription factor	---	BHLH039; FUNCTIONS IN: transcription factor activity, DNA binding; INVOLVED IN: regulation of transcription; LOCATED IN: nucleus; EXPRESSED IN: 7 plant structures; EXPRESSED DURING: LP.06 six leaves visible, LP.04 four leaves visible, LP.10 ten leaves visible, LP.12 twelve leaves visible, LP.08 eight leaves visible; CONTAINS InterPro DOMAIN/s: Achaete-scute transcription factor related (InterPro:…	GO:0005634	nucleus	AnalysisReference:501730468	GO:0003677 | GO:0003700 | GO:0003700	DNA binding | transcription factor activity | transcription factor activity	Communication:501714663 | Publication:1345963|PMID:11118137 | Publication:501705886|PMID:12679534	GO:0045449	regulation of transcription	Publication:1345963|PMID:11118137	ORG3	843	6	13	9.5	13	4	8.5	2	1	1.5	1	2	1.5	5	9	7	6	1	3.5	13	51	32	0	4	2	5	194	99.5
SRG2	AT3G60140	AT3G60140	8	560	1	NA	NA	protein_coding	DIN2 (DARK INDUCIBLE 2); catalytic/ cation binding / hydrolase, hydrolyzing O-glycosyl compounds	Encodes a protein similar to beta-glucosidase and is a member of glycoside hydrolase family 1. Expression is induced after 24 hours of dark treatment, in senescing leaves and treatment with exogenous photosynthesis inhibitor. Induction of gene expression was suppressed in excised leaves supplied with sugar. The authors suggest that the gene's expression pattern is responding to the level of sugar…	DARK INDUCIBLE 2 (DIN2); FUNCTIONS IN: cation binding, hydrolase activity, hydrolyzing O-glycosyl compounds, catalytic activity; INVOLVED IN: response to light stimulus, aging, response to sucrose stimulus; LOCATED IN: endomembrane system; EXPRESSED IN: 10 plant structures; EXPRESSED DURING: 4 anthesis, LP.04 four leaves visible, 4 leaf senescence stage; CONTAINS InterPro DOMAIN/s: Glycoside hydr…	GO:0012505	endomembrane system	AnalysisReference:501730133	GO:0003824 | GO:0004553 | GO:0004553 | GO:0043169	catalytic activity | "hydrolase activity, hydrolyzing O-glycosyl compounds" | "hydrolase activity, hydrolyzing O-glycosyl compounds" | cation binding	AnalysisReference:501730468 | Communication:501714663 | AnalysisReference:501730468 | AnalysisReference:501730468	GO:0007568 | GO:0009416 | GO:0009744	aging | response to light stimulus | response to sucrose stimulus	Publication:501683242|PMID:11240919 | Publication:501683242|PMID:11240919 | Publication:501683242|PMID:11240919	SRG2	1929	105	221	163	450	315	382.5	229	196	212.5	149	217	183	126	147	136.5	88	196	142	172	133	152.5	86	42	64	208	192	200
SLR	AT4G14550	AT4G14550	8	333	1	NA	NA	protein_coding	IAA14 (INDOLE-3-ACETIC ACID INDUCIBLE 14); protein binding / transcription factor/ transcription repressor	IAA14 is a member of the Aux/IAA protein family. Involved in lateral root development. Gain of function mutation decreases auxin-inducible gene expression. Protein is localized to the nucleus. Expressed in stele and root tip epidermis. Functions as a negative regulator of ARF7/19.	INDOLE-3-ACETIC ACID INDUCIBLE 14 (IAA14); FUNCTIONS IN: protein binding, transcription repressor activity, transcription factor activity; INVOLVED IN: response to auxin stimulus, lateral root morphogenesis; LOCATED IN: nucleus; EXPRESSED IN: 24 plant structures; EXPRESSED DURING: 13 growth stages; CONTAINS InterPro DOMAIN/s: Aux/IAA-ARF-dimerisation (InterPro:IPR011525), AUX/IAA protein (InterPr…	GO:0005634	nucleus	Publication:501681916|PMID:11862947	GO:0003700 | GO:0005515 | GO:0016564	transcription factor activity | protein binding | transcription repressor activity	Publication:1345963|PMID:11118137 | Publication:501717883|PMID:16236149 | Publication:501681916|PMID:11862947	GO:0009733 | GO:0010102	response to auxin stimulus | lateral root morphogenesis	Publication:501681609|PMID:12036262 | Publication:501681916|PMID:11862947	SLR	1482	309	436	372.5	443	357	400	265	289	277	341	480	410.5	428	509	468.5	271	378	324.5	765	719	742	737	622	679.5	437	574	505.5
AT5G05790	AT5G05790	AT5G05790	8	355	1	NA	NA	protein_coding	myb family transcription factor	---	myb family transcription factor; FUNCTIONS IN: transcription factor activity, DNA binding; INVOLVED IN: regulation of transcription; EXPRESSED IN: 17 plant structures; EXPRESSED DURING: 8 growth stages; CONTAINS InterPro DOMAIN/s: Molecular chaperone, heat shock protein, Hsp40, DnaJ (InterPro:IPR015609), SANT, eukarya (InterPro:IPR017884), Myb-like DNA-binding region, SHAQKYF class (InterPro:IPR0…	---	---	---	GO:0003677 | GO:0003700	DNA binding | transcription factor activity	Communication:501714663 | Publication:1345963|PMID:11118137	GO:0045449	regulation of transcription	Publication:1345963|PMID:11118137	AT5G05790	1343	75	104	89.5	155	106	130.5	111	106	108.5	141	169	155	129	162	145.5	112	153	132.5	80	89	84.5	94	85	89.5	94	132	113
VNI2	AT5G13180	AT5G13180	8	359	1	NA	NA	protein_coding	ANAC083 (ARABIDOPSIS NAC DOMAIN CONTAINING PROTEIN 83); transcription factor	---	ARABIDOPSIS NAC DOMAIN CONTAINING PROTEIN 83 (ANAC083); FUNCTIONS IN: transcription factor activity; INVOLVED IN: multicellular organismal development, regulation of transcription; LOCATED IN: cellular_component unknown; EXPRESSED IN: 22 plant structures; EXPRESSED DURING: 13 growth stages; CONTAINS InterPro DOMAIN/s: No apical meristem (NAM) protein (InterPro:IPR003441); BEST Arabidopsis thalian…	GO:0005575	cellular_component	Communication:1345790	GO:0003700	transcription factor activity	Publication:1345963|PMID:11118137	GO:0007275 | GO:0045449	multicellular organismal development | regulation of transcription	Communication:501714663 | AnalysisReference:501730468	VNI2	1101	2312	2910	2611	2229	1971	2100	2882	2924	2903	1867	2521	2194	2189	2622	2405.5	2039	2631	2335	2149	1918	2033.5	1356	1243	1299.5	1921	2409	2165
AT5G17780	AT5G17780	AT5G17780	8	192	1	AT5G17780	1	protein_coding	hydrolase, alpha/beta fold family protein	---	hydrolase, alpha/beta fold family protein; FUNCTIONS IN: hydrolase activity; LOCATED IN: endomembrane system; EXPRESSED IN: 13 plant structures; EXPRESSED DURING: 8 growth stages; CONTAINS InterPro DOMAIN/s: Alpha/beta hydrolase fold-1 (InterPro:IPR000073); BEST Arabidopsis thaliana protein match is: hydrolase, alpha/beta fold family protein (TAIR:AT5G17720.1); Has 5591 Blast hits to 5587 protein…	GO:0012505	endomembrane system	AnalysisReference:501730133	GO:0016787	hydrolase activity	Communication:501714663	---	---	---	AT5G17780	1480	295	364	329.5	295	256	275.5	259	220	239.5	209	226	217.5	210	233	221.5	105	154	129.5	341	384	362.5	290	299	294.5	370	334	352
NAC097	AT5G50820	AT5G50820	8	379	1	NA	NA	protein_coding	anac097 (Arabidopsis NAC domain containing protein 97); transcription factor	---	Arabidopsis NAC domain containing protein 97 (anac097); FUNCTIONS IN: transcription factor activity; INVOLVED IN: multicellular organismal development, regulation of transcription; LOCATED IN: cellular_component unknown; EXPRESSED IN: 9 plant structures; EXPRESSED DURING: 6 growth stages; CONTAINS InterPro DOMAIN/s: No apical meristem (NAM) protein (InterPro:IPR003441); BEST Arabidopsis thaliana …	GO:0005575	cellular_component	Communication:1345790	GO:0003700	transcription factor activity	Publication:1345963|PMID:11118137	GO:0007275 | GO:0045449	multicellular organismal development | regulation of transcription	Communication:501714663 | AnalysisReference:501730468	NAC097	701	33	45	39	22	11	16.5	19	15	17	32	46	39	17	31	24	14	15	14.5	46	19	32.5	17	10	13.5	46	40	43
AT5G54720	AT5G54720	AT5G54720	8	211	3	AT5G54720	3	protein_coding	ankyrin repeat family protein	---	ankyrin repeat family protein; FUNCTIONS IN: protein binding; INVOLVED IN: biological_process unknown; LOCATED IN: cellular_component unknown; EXPRESSED IN: 11 plant structures; EXPRESSED DURING: 8 growth stages; CONTAINS InterPro DOMAIN/s: Ankyrin (InterPro:IPR002110); BEST Arabidopsis thaliana protein match is: ankyrin repeat family protein (TAIR:AT5G54710.1); Has 165 Blast hits to 155 proteins…	GO:0005575	cellular_component	Communication:1345790	GO:0005515	protein binding	Communication:501714663	GO:0008150	biological_process	Communication:1345790	AT5G54720	755	129	124	126.5	133	136	134.5	180	178	179	156	198	177	148	179	163.5	97	153	125	111	98	104.5	92	90	91	149	200	174.5
HEC1	AT5G67060	AT5G67060	8	395	2	NA	NA	protein_coding	HEC1 (HECATE 1); transcription factor	---	HECATE 1 (HEC1); FUNCTIONS IN: transcription factor activity; INVOLVED IN: transmitting tissue development, carpel formation, regulation of transcription; LOCATED IN: nucleus; EXPRESSED IN: 9 plant structures; EXPRESSED DURING: 6 growth stages; CONTAINS InterPro DOMAIN/s: Basic helix-loop-helix dimerisation region bHLH (InterPro:IPR001092), Helix-loop-helix DNA-binding (InterPro:IPR011598); BEST …	GO:0005634	nucleus	AnalysisReference:501730468	GO:0003700 | GO:0003700	transcription factor activity | transcription factor activity	Publication:1345963|PMID:11118137 | Publication:501705886|PMID:12679534	GO:0010500 | GO:0045449 | GO:0048462	transmitting tissue development | regulation of transcription | carpel formation	Publication:501723168|PMID:17855426 | Publication:1345963|PMID:11118137 | Publication:501723168|PMID:17855426	HEC1	1123	9	17	13	8	10	9	45	28	36.5	8	12	10	18	12	15	18	22	20	21	19	20	31	18	24.5	11	22	16.5
GA2OX4	AT1G47990	AT1G47990	7	20	1	AT1G47990	1	protein_coding	ATGA2OX4 (ARABIDOPSIS THALIANA GIBBERELLIN 2-OXIDASE 4); gibberellin 2-beta-dioxygenase	Encodes a gibberellin 2-oxidase. AtGA2OX4 expression is responsive to cytokinin and KNOX activities.	ARABIDOPSIS THALIANA GIBBERELLIN 2-OXIDASE 4 (ATGA2OX4); FUNCTIONS IN: gibberellin 2-beta-dioxygenase activity; INVOLVED IN: gibberellin catabolic process; LOCATED IN: membrane; EXPRESSED IN: shoot apical meristem, leaf primordium, leaf; CONTAINS InterPro DOMAIN/s: Isopenicillin N synthase (InterPro:IPR002283), 2OG-Fe(II) oxygenase (InterPro:IPR005123); BEST Arabidopsis thaliana protein match is:…	GO:0016020	membrane	Publication:501721401|PMID:17432890	GO:0045543	gibberellin 2-beta-dioxygenase activity	Publication:501717792|PMID:16139211	GO:0045487	gibberellin catabolic process	Publication:501717792|PMID:16139211	GA2OX4	966	13	19	16	17	16	16.5	29	30	29.5	19	15	17	14	24	19	23	23	23	31	23	27	27	15	21	21	29	25
BIM2	AT1G69010	AT1G69010	7	261	1	NA	NA	protein_coding	BIM2 (BES1-interacting Myc-like protein 2); DNA binding / transcription factor	---	BES1-interacting Myc-like protein 2 (BIM2); FUNCTIONS IN: transcription factor activity, DNA binding; INVOLVED IN: dTDP-rhamnose biosynthetic process, regulation of transcription; LOCATED IN: nucleus; EXPRESSED IN: 22 plant structures; EXPRESSED DURING: 13 growth stages; CONTAINS InterPro DOMAIN/s: Basic helix-loop-helix dimerisation region bHLH (InterPro:IPR001092), Helix-loop-helix DNA-binding …	GO:0005634	nucleus	AnalysisReference:501730468	GO:0003677 | GO:0003700 | GO:0003700 | GO:0003700	DNA binding | transcription factor activity | transcription factor activity | transcription factor activity	Communication:501714663 | Communication:501714663 | Publication:1345963|PMID:11118137 | Publication:501705886|PMID:12679534	GO:0019305 | GO:0045449	dTDP-rhamnose biosynthetic process | regulation of transcription	AnalysisReference:1445901 | AnalysisReference:501730468	BIM2	1302	466	662	564	545	472	508.5	614	588	601	394	495	444.5	497	553	525	352	468	410	999	1122	1060.5	662	546	604	872	939	905.5
PIN3	AT1G70940	AT1G70940	7	68	3	AT1G70940	3	protein_coding	PIN3 (PIN-FORMED 3); auxin:hydrogen symporter/ transporter	A regulator of auxin efflux and involved in differential growth. PIN3 is expressed in gravity-sensing tissues, with PIN3 protein accumulating predominantly at the lateral cell surface. PIN3 localizes to the plasma membrane and to vesicles. In roots, PIN3 is expressed without pronounced polarity in tiers two and three of the columella cells, at the basal side of vascular cells, and to the lateral …	PIN-FORMED 3 (PIN3); FUNCTIONS IN: auxin:hydrogen symporter activity, transporter activity; INVOLVED IN: in 8 processes; LOCATED IN: lateral plasma membrane, plasma membrane, vesicle membrane, cell surface; EXPRESSED IN: 26 plant structures; EXPRESSED DURING: 13 growth stages; CONTAINS InterPro DOMAIN/s: Auxin efflux carrier, subgroup (InterPro:IPR014024), Auxin efflux carrier (InterPro:IPR004776…	GO:0005886 | GO:0005886 | GO:0009986 | GO:0012506 | GO:0016328	plasma membrane | plasma membrane | cell surface | vesicle membrane | lateral plasma membrane	Publication:1547297|PMID:11845211 | Publication:501720929|PMID:17317660 | Publication:501719016|PMID:16731587 | Publication:1547297|PMID:11845211 | Publication:1547297|PMID:11845211	GO:0005215 | GO:0005215 | GO:0009672	transporter activity | transporter activity | auxin:hydrogen symporter activity	Communication:1674994 | Communication:1674994 | Communication:501714663	GO:0007389 | GO:0009606 | GO:0009630 | GO:0009926 | GO:0009926 | GO:0009926 | GO:0010082 | GO:0048364 | GO:0048766 | GO:0048767	pattern specification process | tropism | gravitropism | auxin polar transport | auxin polar transport | auxin polar transport | regulation of root meristem growth | root development | root hair initiation | root hair elongation	Publication:501714510|PMID:15635403 | Publication:1547297|PMID:11845211 | Publication:501717730|PMID:16141452 | Publication:1547297|PMID:11845211 | Communication:501714663 | Publication:1547297|PMID:11845211 | Publication:501714510|PMID:15635403 | Publication:501714510|PMID:15635403 | Publication:501719016|PMID:16731587 | Publication:501719016|PMID:16731587	PIN3	2563	2820	3766	3293	3406	2985	3195.5	5227	5220	5223.5	2921	3867	3394	3064	3898	3481	1658	2330	1994	7091	8088	7589.5	6168	5695	5931.5	4902	5731	5316.5
KCS9	AT2G16280	AT2G16280	7	79	1	AT2G16280	1	protein_coding	KCS9 (3-KETOACYL-COA SYNTHASE 9); acyltransferase/ catalytic/ transferase, transferring acyl groups other than amino-acyl groups	Encodes KCS9, a member of the 3-ketoacyl-CoA synthase family involved in the biosynthesis of VLCFA (very long chain fatty acids).	3-KETOACYL-COA SYNTHASE 9 (KCS9); FUNCTIONS IN: transferase activity, transferring acyl groups other than amino-acyl groups, catalytic activity, acyltransferase activity; INVOLVED IN: very-long-chain fatty acid metabolic process, response to light stimulus, response to cold, response to osmotic stress, cuticle development; LOCATED IN: membrane; EXPRESSED IN: 25 plant structures; EXPRESSED DURING:…	GO:0016020	membrane	AnalysisReference:501730468	GO:0003824 | GO:0008415 | GO:0016747	catalytic activity | acyltransferase activity | "transferase activity, transferring acyl groups other than amino-acyl groups"	AnalysisReference:501730468 | AnalysisReference:501730468 | AnalysisReference:501730468	GO:0000038 | GO:0009409 | GO:0009416 | GO:0042335	very-long-chain fatty acid metabolic process | response to cold | response to light stimulus | cuticle development	Publication:1519|PMID:10330468 | Publication:501724806|PMID:18465198 | Publication:501724806|PMID:18465198 | Publication:1519|PMID:10330468	KCS9	1954	5015	5637	5326	8990	7561	8275.5	6505	6037	6271	7384	10207	8795.5	6978	8114	7546	5560	6903	6231.5	6677	7243	6960	6716	6044	6380	5150	6464	5807
AT2G22200	AT2G22200	AT2G22200	7	278	1	NA	NA	protein_coding	AP2 domain-containing transcription factor	encodes a member of the DREB subfamily A-6 of ERF/AP2 transcription factor family. The protein contains one AP2 domain. There are 8 members in this subfamily including RAP2.4.	AP2 domain-containing transcription factor; FUNCTIONS IN: transcription factor activity, DNA binding; INVOLVED IN: regulation of transcription, DNA-dependent; LOCATED IN: nucleus; CONTAINS InterPro DOMAIN/s: DNA-binding, integrase-type (InterPro:IPR016177), Pathogenesis-related transcriptional factor and ERF, DNA-binding (InterPro:IPR001471); BEST Arabidopsis thaliana protein match is: AP2 domain…	GO:0005634	nucleus	Publication:3195|PMID:9192694	GO:0003677 | GO:0003700 | GO:0003700	DNA binding | transcription factor activity | transcription factor activity	Communication:501714663 | Publication:3195|PMID:9192694 | Publication:1345963|PMID:11118137	GO:0006355 | GO:0006355	regulation of transcription, DNA-dependent | "regulation of transcription, DNA-dependent"	Communication:501714663 | AnalysisReference:501730468	AT2G22200	1296	116	132	124	308	205	256.5	342	355	348.5	203	244	223.5	218	223	220.5	149	137	143	102	140	121	101	78	89.5	139	234	186.5
IAA13	AT2G33310	AT2G33310	7	288	1	NA	NA	protein_coding	IAA13; transcription factor	Auxin induced gene, IAA13 (IAA13).	IAA13; FUNCTIONS IN: transcription factor activity; INVOLVED IN: response to cyclopentenone, response to auxin stimulus; LOCATED IN: nucleus; EXPRESSED IN: 22 plant structures; EXPRESSED DURING: 13 growth stages; CONTAINS InterPro DOMAIN/s: Aux/IAA-ARF-dimerisation (InterPro:IPR011525), AUX/IAA protein (InterPro:IPR003311); BEST Arabidopsis thaliana protein match is: IAA12 (AUXIN-INDUCED PROTEIN …	GO:0005634	nucleus	AnalysisReference:501730468	GO:0003700	transcription factor activity	Publication:1345963|PMID:11118137	GO:0009733 | GO:0010583	response to auxin stimulus | response to cyclopentenone	Publication:501681609|PMID:12036262 | Publication:501724352|PMID:18334669	IAA13	2146	247	316	281.5	418	415	416.5	380	404	392	329	424	376.5	395	478	436.5	295	410	352.5	617	708	662.5	580	522	551	333	411	372
BEH1	AT3G50750	AT3G50750	7	318	1	NA	NA	protein_coding	brassinosteroid signalling positive regulator-related	---	brassinosteroid signalling positive regulator-related; FUNCTIONS IN: transcription regulator activity; INVOLVED IN: biological_process unknown; LOCATED IN: vacuole; EXPRESSED IN: 17 plant structures; EXPRESSED DURING: 12 growth stages; CONTAINS InterPro DOMAIN/s: BZR1, transcriptional repressor (InterPro:IPR008540); BEST Arabidopsis thaliana protein match is: BZR1 (BRASSINAZOLE-RESISTANT 1); DNA …	GO:0005773	vacuole	Publication:501714874|PMID:15539469	GO:0030528	transcription regulator activity	Publication:501707644|PMID:11970900	GO:0008150	biological_process	Communication:1345790	BEH1	1311	629	786	707.5	700	578	639	883	908	895.5	747	933	840	705	883	794	544	796	670	1027	1139	1083	1039	912	975.5	1384	1598	1491
AT3G55240	AT3G55240	AT3G55240	7	1836	4	NA	NA	protein_coding	---	Overexpression leads to PEL (Pseudo-Etiolation in Light) phenotype.	FUNCTIONS IN: molecular_function unknown; INVOLVED IN: developmental process; LOCATED IN: endomembrane system; CONTAINS InterPro DOMAIN/s: Conserved hypothetical protein CHP01589, plant (InterPro:IPR006476); BEST Arabidopsis thaliana protein match is: unknown protein (TAIR:AT3G28990.1); Has 117 Blast hits to 117 proteins in 12 species: Archae - 0; Bacteria - 0; Metazoa - 0; Fungi - 0; Plants - 11…	GO:0012505	endomembrane system	AnalysisReference:501730133	GO:0003674	molecular_function	Communication:501683652	GO:0032502	developmental process	Publication:501720764|PMID:17227551	AT3G55240	681	52	55	53.5	45	25	35	127	149	138	68	47	57.5	146	82	114	114	99	106.5	115	139	127	222	231	226.5	132	144	138
PIF7	AT5G61270	AT5G61270	7	214	3	AT5G61270	3	protein_coding	PIF7 (PHYTOCHROME-INTERACTING FACTOR7); DNA binding / double-stranded DNA binding / transcription factor	Basic helix-loop-helix (bHLH) phytochrome interacting factor. Interacts specifically with the far-red light–absorbing Pfr form of phyB through a conserved domain called the active phyB binding motif. Upon light exposure, PIF7 rapidly migrates to intranuclear speckles, where it colocalizes with phyB. Role as negative regulator of phyB-mediated seedling deetiolation.	PHYTOCHROME-INTERACTING FACTOR7 (PIF7); FUNCTIONS IN: double-stranded DNA binding, transcription factor activity, DNA binding; INVOLVED IN: de-etiolation, response to light stimulus, regulation of transcription; LOCATED IN: nuclear speck; CONTAINS InterPro DOMAIN/s: Basic helix-loop-helix dimerisation region bHLH (InterPro:IPR001092), Helix-loop-helix DNA-binding (InterPro:IPR011598); BEST Arabid…	GO:0016607	nuclear speck	Publication:501724198|PMID:18252845	GO:0003677 | GO:0003690 | GO:0003700 | GO:0003700 | GO:0003700 | GO:0003700	DNA binding | double-stranded DNA binding | transcription factor activity | transcription factor activity | transcription factor activity | transcription factor activity	Communication:501714663 | Publication:501724198|PMID:18252845 | Communication:501714663 | Publication:1345963|PMID:11118137 | Publication:501705886|PMID:12679534 | Publication:501724198|PMID:18252845	GO:0009416 | GO:0009704 | GO:0045449	response to light stimulus | de-etiolation | regulation of transcription	Publication:501724198|PMID:18252845 | Publication:501724198|PMID:18252845 | Publication:1345963|PMID:11118137	PIF7	1470	1665	2114	1889.5	1892	1755	1823.5	1702	1814	1758	1503	1984	1743.5	1798	2293	2045.5	1259	1670	1464.5	1230	1165	1197.5	988	885	936.5	1725	1940	1832.5
AT5G66080	AT5G66080	AT5G66080	7	2303	5	NA	NA	protein_coding	protein phosphatase 2C family protein / PP2C family protein	---	protein phosphatase 2C family protein / PP2C family protein; FUNCTIONS IN: protein serine/threonine phosphatase activity, catalytic activity; INVOLVED IN: protein amino acid dephosphorylation; LOCATED IN: protein serine/threonine phosphatase complex; EXPRESSED IN: 16 plant structures; EXPRESSED DURING: 10 growth stages; CONTAINS InterPro DOMAIN/s: Protein phosphatase 2C, manganese/magnesium aspar…	GO:0008287	protein serine/threonine phosphatase complex	AnalysisReference:501730468	GO:0003824 | GO:0004722 | GO:0004722	catalytic activity | protein serine/threonine phosphatase activity | protein serine/threonine phosphatase activity	AnalysisReference:501730468 | Communication:501714663 | AnalysisReference:501730468	GO:0006470	protein amino acid dephosphorylation	AnalysisReference:501730468	AT5G66080	1691	113	163	138	146	106	126	240	235	237.5	231	221	226	220	325	272.5	241	357	299	340	315	327.5	336	373	354.5	450	564	507
AT1G06070	AT1G06070	AT1G06070	6	235	3	NA	NA	protein_coding	bZIP transcription factor, putative (bZIP69)	---	bZIP transcription factor, putative (bZIP69); FUNCTIONS IN: transcription factor activity, DNA binding; INVOLVED IN: regulation of transcription, DNA-dependent; LOCATED IN: nucleus, chloroplast; EXPRESSED IN: 23 plant structures; EXPRESSED DURING: 13 growth stages; CONTAINS InterPro DOMAIN/s: Basic-leucine zipper (bZIP) transcription factor (InterPro:IPR004827), bZIP transcription factor, bZIP-1 …	GO:0005634 | GO:0009507	nucleus | chloroplast	AnalysisReference:501730468 | AnalysisReference:501730133	GO:0003677 | GO:0003700 | GO:0003700	DNA binding | transcription factor activity | transcription factor activity	Communication:501714663 | Publication:1345963|PMID:11118137 | Publication:1547369|PMID:11906833	GO:0006355	regulation of transcription, DNA-dependent	AnalysisReference:501730468	AT1G06070	1893	317	377	347	389	286	337.5	560	541	550.5	302	343	322.5	335	418	376.5	358	467	412.5	387	407	397	751	674	712.5	385	461	423
WAV5	AT2G38120	AT2G38120	6	1582	3	NA	NA	protein_coding	AUX1 (AUXIN RESISTANT 1); amino acid transmembrane transporter/ auxin binding / auxin influx transmembrane transporter/ transporter	Encodes an auxin influx transporter. AUX1 resides at the apical plasma membrane of protophloem cells and at highly dynamic subpopulations of Golgi apparatus and endosomes in all cell types. AUX1 action in the lateral root cap and/or epidermal cells influences lateral root initiation and positioning.	AUXIN RESISTANT 1 (AUX1); FUNCTIONS IN: auxin binding, auxin influx transmembrane transporter activity, amino acid transmembrane transporter activity, transporter activity; INVOLVED IN: in 9 processes; LOCATED IN: endosome, Golgi apparatus, plasma membrane, cell surface, membrane; EXPRESSED IN: 27 plant structures; EXPRESSED DURING: 13 growth stages; CONTAINS InterPro DOMAIN/s: Amino acid transpo…	GO:0005768 | GO:0005794 | GO:0005886 | GO:0009986 | GO:0016020	endosome | Golgi apparatus | plasma membrane | cell surface | membrane	Publication:501720331|PMID:17114355 | Publication:501720331|PMID:17114355 | Publication:501720225|PMID:16690816 | Publication:1545932|PMID:11641271 | Communication:501714663	GO:0005215 | GO:0010011 | GO:0010328 | GO:0015171 | GO:0015171	transporter activity | auxin binding | auxin influx transmembrane transporter activity | amino acid transmembrane transporter activity | amino acid transmembrane transporter activity	Communication:1674994 | Publication:501727367|PMID:18614710 | Publication:501720014|PMID:16677815 | Communication:1674994 | Publication:2781|PMID:9484486	GO:0001736 | GO:0006865 | GO:0009624 | GO:0009723 | GO:0009733 | GO:0009926 | GO:0009958 | GO:0010311 | GO:0010311 | GO:0048765	establishment of planar polarity | amino acid transport | response to nematode | response to ethylene stimulus | response to auxin stimulus | auxin polar transport | positive gravitropism | lateral root formation | lateral root formation | root hair cell differentiation	Publication:501720447|PMID:17084699 | Communication:501714663 | Publication:501718529|PMID:16478044 | Publication:501676062 | Publication:501676062 | Publication:501719218|PMID:16839804 | Publication:3750|PMID:8688077 | Publication:501720826|PMID:17215297 | Publication:501729245|PMID:18622388 | Publication:501720447|PMID:17084699	WAV5	2135	1111	1361	1236	1472	1193	1332.5	2656	2807	2731.5	1368	1800	1584	1716	2065	1890.5	1537	2086	1811.5	2924	3253	3088.5	2509	2043	2276	3505	3901	3703
ORE7	AT1G20900	AT1G20900	5	15	1	AT1G20900	1	protein_coding	ESC (ESCAROLA); double-stranded DNA binding	Encodes an AT hook domain containing protein that acts redundantly with SOB3 to modulate hypocotyl growth inhibition in response to light.	ESCAROLA (ESC); FUNCTIONS IN: double-stranded DNA binding; INVOLVED IN: leaf senescence, establishment or maintenance of chromatin architecture, photomorphogenesis; LOCATED IN: nucleus; EXPRESSED IN: 15 plant structures; EXPRESSED DURING: 7 growth stages; CONTAINS InterPro DOMAIN/s: Protein of unknown function DUF296 (InterPro:IPR005175), Predicted AT-hook DNA-binding (InterPro:IPR014476); BEST A…	GO:0005634	nucleus	Publication:501723249|PMID:17971039	GO:0003690	double-stranded DNA binding	Publication:501723249|PMID:17971039	GO:0006325 | GO:0009640 | GO:0010150	chromatin organization | photomorphogenesis | leaf senescence	Publication:501723249|PMID:17971039 | Publication:501723741|PMID:18088311 | Publication:501723249|PMID:17971039	ORE7	1517	3	18	10.5	18	11	14.5	11	11	11	12	15	13.5	9	12	10.5	12	16	14	21	14	17.5	8	16	12	18	13	15.5
PAP2	AT1G66390	AT1G66390	4	258	1	NA	NA	protein_coding	MYB90 (MYB DOMAIN PROTEIN 90); DNA binding / transcription factor	production of anthocyanin pigment 2 protein (PAP2)	MYB DOMAIN PROTEIN 90 (MYB90); FUNCTIONS IN: transcription factor activity, DNA binding; INVOLVED IN: regulation of transcription; EXPRESSED IN: stem, leaf whorl, embryo, sepal, stamen; EXPRESSED DURING: 4 anthesis, D bilateral stage; CONTAINS InterPro DOMAIN/s: SANT, DNA-binding (InterPro:IPR001005), Homeodomain-like (InterPro:IPR009057), Myb, DNA-binding (InterPro:IPR014778), Myb-type HTH DNA-b…	---	---	---	GO:0003677 | GO:0003700 | GO:0003700	DNA binding | transcription factor activity | transcription factor activity	Communication:501714663 | Communication:501714663 | Publication:1345963|PMID:11118137	GO:0045449	regulation of transcription	Publication:1345963|PMID:11118137	PAP2	986	6	7	6.5	8	11	9.5	1	3	2	7	6	6.5	5	7	6	5	5	5	10	16	13	18	8	13	10	11	10.5
BCAT4	AT3G19710	AT3G19710	4	120	1	AT3G19710	1	protein_coding	BCAT4 (BRANCHED-CHAIN AMINOTRANSFERASE4); catalytic/ methionine-oxo-acid transaminase	Belongs to the branched-chain amino acid aminotransferase gene family. Encodes a methionine-oxo-acid transaminase. Involved in the methionine chain elongation pathway that leads to the ultimate biosynthesis of methionine-derived glucosinolates.	BRANCHED-CHAIN AMINOTRANSFERASE4 (BCAT4); FUNCTIONS IN: methionine-oxo-acid transaminase activity, catalytic activity; INVOLVED IN: glucosinolate biosynthetic process; LOCATED IN: cytosol; EXPRESSED IN: 22 plant structures; EXPRESSED DURING: 12 growth stages; CONTAINS InterPro DOMAIN/s: Aminotransferase, class IV (InterPro:IPR001544), Branched-chain amino acid aminotransferase II (InterPro:IPR005…	GO:0005829	cytosol	Publication:501720068|PMID:17056707	GO:0003824 | GO:0010326	catalytic activity | methionine-oxo-acid transaminase activity	Communication:501714663 | Publication:501720068|PMID:17056707	GO:0019761	glucosinolate biosynthetic process	Publication:501720068|PMID:17056707	BCAT4	1366	428	398	413	701	529	615	277	260	268.5	683	810	746.5	1103	651	877	597	736	666.5	523	1234	878.5	559	786	672.5	729	932	830.5
AT3G50840	AT3G50840	AT3G50840	3	144	4	AT3G50840	4	protein_coding	phototropic-responsive NPH3 family protein	---	phototropic-responsive NPH3 family protein; FUNCTIONS IN: protein binding, signal transducer activity; INVOLVED IN: response to light stimulus; LOCATED IN: cellular_component unknown; CONTAINS InterPro DOMAIN/s: NPH3 (InterPro:IPR004249), BTB/POZ fold (InterPro:IPR011333), BTB/POZ-like (InterPro:IPR000210); BEST Arabidopsis thaliana protein match is: phototropic-responsive NPH3 family protein (TA…	GO:0005575	cellular_component	Communication:1345790	GO:0004871 | GO:0004871 | GO:0005515	signal transducer activity | signal transducer activity | protein binding	Communication:501714663 | AnalysisReference:501730468 | AnalysisReference:501730468	GO:0009416 | GO:0009416	response to light stimulus | response to light stimulus	Communication:501714663 | AnalysisReference:501730468	AT3G50840	2135	104	128	116	94	91	92.5	115	122	118.5	105	109	107	187	205	196	203	240	221.5	64	53	58.5	48	35	41.5	78	72	75
ARF18	AT3G61830	AT3G61830	3	328	4	NA	NA	protein_coding	ARF18 (AUXIN RESPONSE FACTOR 18); transcription factor	---	AUXIN RESPONSE FACTOR 18 (ARF18); FUNCTIONS IN: transcription factor activity; INVOLVED IN: response to hormone stimulus, regulation of transcription, DNA-dependent, regulation of transcription; LOCATED IN: nucleus; EXPRESSED IN: 22 plant structures; EXPRESSED DURING: 13 growth stages; CONTAINS InterPro DOMAIN/s: Aux/IAA-ARF-dimerisation (InterPro:IPR011525), Transcriptional factor B3 (InterPro:I…	GO:0005634	nucleus	AnalysisReference:501730468	GO:0003700	transcription factor activity	Publication:1345963|PMID:11118137	GO:0006355 | GO:0009725 | GO:0045449	regulation of transcription, DNA-dependent | response to hormone stimulus | regulation of transcription	AnalysisReference:501730468 | AnalysisReference:501730468 | AnalysisReference:501730468	ARF18	2347	242	300	271	397	242	319.5	460	486	473	319	319	319	298	334	316	226	311	268.5	423	450	436.5	707	621	664	444	488	466
WES1	AT4G27260	AT4G27260	3	896	5	NA	NA	protein_coding	WES1; indole-3-acetic acid amido synthetase	encodes an IAA-amido synthase that conjugates Asp and other amino acids to auxin in vitro. Lines carrying insertions in this gene are hypersensitive to auxin.	WES1; FUNCTIONS IN: indole-3-acetic acid amido synthetase activity; INVOLVED IN: auxin homeostasis, response to auxin stimulus; LOCATED IN: cellular_component unknown; EXPRESSED IN: 21 plant structures; EXPRESSED DURING: 12 growth stages; CONTAINS InterPro DOMAIN/s: GH3 auxin-responsive promoter (InterPro:IPR004993); BEST Arabidopsis thaliana protein match is: DFL1 (DWARF IN LIGHT 1); indole-3-ac…	GO:0005575	cellular_component	Communication:1345790	GO:0010279	indole-3-acetic acid amido synthetase activity	Publication:501714420|PMID:15659623	GO:0009733 | GO:0009733 | GO:0010252	response to auxin stimulus | response to auxin stimulus | auxin homeostasis	Publication:501714420|PMID:15659623 | Communication:501714663 | Publication:501714420|PMID:15659623	WES1	2246	281	407	344	442	366	404	378	368	373	357	411	384	429	582	505.5	331	491	411	925	839	882	1933	1916	1924.5	457	511	484
RGL3	AT5G17490	AT5G17490	3	363	1	NA	NA	protein_coding	RGL3 (RGA-LIKE PROTEIN 3); transcription factor	DELLA subfamily member involved in GA signal transduction	RGA-LIKE PROTEIN 3 (RGL3); FUNCTIONS IN: transcription factor activity; INVOLVED IN: response to gibberellin stimulus, gibberellic acid mediated signaling; LOCATED IN: nucleus; EXPRESSED IN: 7 plant structures; EXPRESSED DURING: 4 anthesis, petal differentiation and expansion stage, D bilateral stage; CONTAINS InterPro DOMAIN/s: GRAS transcription factor (InterPro:IPR005202); BEST Arabidopsis tha…	GO:0005634	nucleus	Publication:501681968|PMID:11826301	GO:0003700 | GO:0003700	transcription factor activity | transcription factor activity	Publication:501681968|PMID:11826301 | Publication:1345963|PMID:11118137	GO:0009739 | GO:0009739 | GO:0009740	response to gibberellin stimulus | response to gibberellin stimulus | gibberellic acid mediated signaling	Publication:501721172|PMID:17333251 | Publication:501681968|PMID:11826301 | Publication:501681968|PMID:11826301	RGL3	2015	31	29	30	31	35	33	61	64	62.5	24	39	31.5	41	60	50.5	42	59	50.5	65	89	77	76	61	68.5	58	75	66.5
HAT2	AT5G47370	AT5G47370	3	202	5	AT5G47370	5	protein_coding	HAT2; DNA binding / transcription factor/ transcription repressor	homeobox-leucine zipper genes induced by auxin, but not by other phytohormones. Plays opposite roles in the shoot and root tissues in regulating auxin-mediated morphogenesis.	HAT2; FUNCTIONS IN: transcription repressor activity, transcription factor activity, DNA binding; INVOLVED IN: auxin mediated signaling pathway, response to auxin stimulus, regulation of transcription, DNA-dependent, shade avoidance, unidimensional cell growth; LOCATED IN: nucleus; EXPRESSED IN: 21 plant structures; EXPRESSED DURING: 13 growth stages; CONTAINS InterPro DOMAIN/s: HD-ZIP protein, N…	GO:0005634 | GO:0005634	nucleus | nucleus	AnalysisReference:501730468 | Communication:501714663	GO:0003677 | GO:0003700 | GO:0016564	DNA binding | transcription factor activity | transcription repressor activity	Publication:501682840|PMID:12492842 | Publication:1345963|PMID:11118137 | Publication:501682840|PMID:12492842	GO:0006355 | GO:0009641 | GO:0009733 | GO:0009734 | GO:0009826	regulation of transcription, DNA-dependent | shade avoidance | response to auxin stimulus | auxin mediated signaling pathway | unidimensional cell growth	Communication:501714663 | Publication:501718653|PMID:16565297 | Publication:501682840|PMID:12492842 | Publication:501682840|PMID:12492842 | Publication:501682840|PMID:12492842	HAT2	1284	133	169	151	397	365	381	263	241	252	374	479	426.5	526	858	692	633	916	774.5	2310	2548	2429	2297	1938	2117.5	1023	1133	1078
HB-2	AT4G16780	AT4G16780	2	337	6	NA	NA	protein_coding	ATHB-2 (ARABIDOPSIS THALIANA HOMEOBOX PROTEIN 2); DNA binding / protein homodimerization/ sequence-specific DNA binding / transcription factor	Encodes a homeodomain-leucine zipper protein that is rapidly and strongly induced by changes in the ratio of red to far-red light. It is also involved in cell expansion and cell proliferation and in the response to auxin.	ARABIDOPSIS THALIANA HOMEOBOX PROTEIN 2 (ATHB-2); FUNCTIONS IN: transcription factor activity, sequence-specific DNA binding, protein homodimerization activity, DNA binding; INVOLVED IN: in 11 processes; LOCATED IN: nucleus; EXPRESSED IN: 9 plant structures; EXPRESSED DURING: 7 growth stages; CONTAINS InterPro DOMAIN/s: HD-ZIP protein, N-terminal (InterPro:IPR006712), Helix-turn-helix motif, lamb…	GO:0005634 | GO:0005634	nucleus | nucleus	Communication:501714663 | Publication:501714452|PMID:15610358	GO:0003677 | GO:0003700 | GO:0042803 | GO:0043565	DNA binding | transcription factor activity | protein homodimerization activity | sequence-specific DNA binding	Communication:501714663 | Publication:1345963|PMID:11118137 | Publication:5116|PMID:8253077 | Publication:5116|PMID:8253077	GO:0006355 | GO:0008283 | GO:0009641 | GO:0009733 | GO:0009735 | GO:0009826 | GO:0010016 | GO:0010017 | GO:0010218 | GO:0016481 | GO:0048364	regulation of transcription, DNA-dependent | cell proliferation | shade avoidance | response to auxin stimulus | response to cytokinin stimulus | unidimensional cell growth | shoot morphogenesis | red or far red light signaling pathway | response to far red light | negative regulation of transcription | root development	Communication:501714663 | Publication:1211|PMID:10477292 | Publication:501718653|PMID:16565297 | Publication:1211|PMID:10477292 | Publication:501717764|PMID:16212609 | Publication:1211|PMID:10477292 | Publication:5233|PMID:8449400 | Publication:501723260|PMID:17965713 | Publication:5118|PMID:8106086 | Publication:1211|PMID:10477292 | Publication:1211|PMID:10477292	HB-2	1171	63	80	71.5	120	99	109.5	173	210	191.5	136	167	151.5	154	206	180	136	149	142.5	3376	3871	3623.5	1416	1177	1296.5	6759	8051	7405
[truncated: 20 more rows]
[truncated: 21 more columns]

## Sheet: GLASSO_result
from_AT	to_AT	from_sym	to_sym	type
[truncated: 8,618 more rows]

## Sheet: JGL_result
from_AT	to_AT	from_sym	to_sym	type
[truncated: 8,188 more rows]

[truncated: 2 more sheets: HGLASSO_result, JRmGRN_result]
